# Supplementary material for: Biologically-informed deep neural networks provide quantitative assessment of intratumoral heterogeneity in post-treatment glioblastoma
Source: Research Square preprint supplement (doi:10.21203/rs.3.rs-3891425/v1), 2024-03-27
Supplement: Supplementary file 1 [file 2223057c0ea19e479959d7ab.xlsx]

## Sheet: Sheet2
#	subj	sequence	acqType	FOV	rows	cols	slices	sliceThickness	TR	flip	numVols	TE	TI	manufacterer	fieldStrength	model
1	x076	T1	3D	260	512	512	126	1	10	13	0	4	450	GE MEDICAL SYSTEMS	1.5T	Signa HDxt
2	x077	T1	3D	256	256	256	180	1	18	30	1	2	0	Philips Medical Systems	3T	Achieva
3	x101	T1	3D	256	512	512	512	1	18	30	1	2	0	Philips Medical Systems	3T	Achieva
4	x111	T1	3D	256	256	256	256	1	25	30	1	6	0	Philips Medical Systems	1.5T	Intera
5	x131	T1	3D	250	256	256	256	1	19	20	0	5	0	GE MEDICAL SYSTEMS	1.5T	SIGNA E
6	x154	T1	3D	260	512	512	146	1	10	13	0	4	450	GE MEDICAL SYSTEMS	3T	Signa HDxt
7	x170	T1	3D	250	256	256	256	1	19	20	0	5	0	GE MEDICAL SYSTEMS	1.5T	SIGNA E
8	x172	T1	3D	250	256	256	256	1	19	20	0	5	0	GE MEDICAL SYSTEMS	1.5T	SIGNA E
9	x186	T1	3D	256	256	256	256	1	25	30	1	6	0	Philips Medical Systems	1.5T	Intera
10	x190	T1	3D	256	256	256	256	1	25	30	1	6	0	Philips Medical Systems	1.5T	Intera
11	x191	T1	3D	253	240	256	256	1	2000	9	0	4	900	SIEMENS	3T	Skyra
12	x201	T1	3D	260	512	512	120	2	10	13	0	4	450	GE MEDICAL SYSTEMS	3T	Signa HDxt
13	x215	T1	3D	260	512	512	122	1	9	13	0	4	450	GE MEDICAL SYSTEMS	1.5T	Signa HDxt
14	x218	T1	3D	260	512	512	512	1	9	13	0	4	450	GE MEDICAL SYSTEMS	1.5T	Signa HDxt
15	x220	T1	3D	260	512	512	512	1	9	13	0	4	450	GE MEDICAL SYSTEMS	3T	Signa HDxt
16	x249	T1	3D	260	512	512	126	1	9	13	0	4	450	GE MEDICAL SYSTEMS	1.5T	Signa HDxt
17	x251	T1	3D	256	256	256	256	1	25	30	1	6	0	Philips Medical Systems	1.5T	Intera
18	x253	T1	3D	256	256	256	210	1	18	30	1	2	0	Philips Medical Systems	3T	Achieva
19	x257	T1	3D	260	512	512	138	1	9	13	0	4	450	GE MEDICAL SYSTEMS	1.5T	Signa HDxt
20	x265	T1	3D	260	512	512	138	1	9	13	0	4	450	GE MEDICAL SYSTEMS	1.5T	Signa HDxt
21	x269	T1	3D	260	512	512	130	1	9	13	0	4	450	GE MEDICAL SYSTEMS	1.5T	Signa HDxt
22	x275	T1	3D	256	256	256	180	1	6	8	1	3	0	Philips Medical Systems	3T	Achieva
23	x282	T1	3D	256	256	256	190	1	7	8	1	3	0	Philips Medical Systems	3T	Achieva
24	x289	T1	3D	256	256	256	256	1	8	12	0	3	450	GE MEDICAL SYSTEMS	1.5T	Signa HDxt
25	x306	T1	3D	240	512	512	121	2	9	12	0	3	450	GE MEDICAL SYSTEMS	3T	Signa HDxt
26	x307	T1	3D	260	512	512	120	2	10	13	0	4	450	GE MEDICAL SYSTEMS	3T	Signa HDxt
27	x319	T1	3D	256	512	512	512	1	21	30	1	6	0	Philips Medical Systems	1.5T	Intera
28	x324	T1	3D	266	256	256	256	1	8	12	0	3	450	GE MEDICAL SYSTEMS	1.5T	Signa HDxt
29	x338	T1	3D	260	512	512	512	1	8	13	0	3	450	GE MEDICAL SYSTEMS	3T	Signa HDxt
30	x365	T1	3D	240	672	672	672	0	6	8	1	3	0	Philips Medical Systems	3T	Achieva
31	x367	T1	3D	260	512	512	512	1	9	13	0	4	450	GE MEDICAL SYSTEMS	1.5T	Signa HDxt
#	subj	sequence	acqType	FOV	rows	cols	slices	sliceThickness	TR	flip	numVols	TE	TI	manufacterer	fieldStrength	model
1	x076	FLAIR	2D	240	256	256	32	5	8802	90	0	122	2200	GE MEDICAL SYSTEMS	1.5T	Signa HDxt
2	x077	FLAIR	3D	256	256	256	256	1	8000	90	1	337	2400	Philips Medical Systems	3T	Achieva
3	x101	FLAIR	2D	220	560	560	32	5	11000	90	1	125	2800	Philips Medical Systems	3T	Achieva
4	x111	FLAIR	2D	220	384	384	32	5	8000	90	1	120	2200	Philips Medical Systems	1.5T	Intera
5	x131	FLAIR	2D	230	256	256	32	5	8802	90	0	122	2200	GE MEDICAL SYSTEMS	1.5T	SIGNA E
6	x154	FLAIR	2D	220	512	512	27	6	9502	90	0	122	2250	GE MEDICAL SYSTEMS	3T	Signa HDxt
7	x170	FLAIR	2D	220	256	256	32	5	8802	90	0	123	2200	GE MEDICAL SYSTEMS	1.5T	SIGNA E
8	x172	FLAIR	2D	220	256	256	32	5	8802	90	0	122	2200	GE MEDICAL SYSTEMS	1.5T	SIGNA E
9	x186	FLAIR	2D	220	384	384	32	5	8000	90	1	120	2200	Philips Medical Systems	1.5T	Intera
10	x190	FLAIR	2D	220	384	384	32	5	8000	90	1	120	2200	Philips Medical Systems	1.5T	Intera
11	x191	FLAIR	2D	179	260	320	32	5	9000	150	0	123	2500	SIEMENS	3T	Skyra
12	x201	FLAIR	2D	220	512	512	29	5	9502	90	0	122	2250	GE MEDICAL SYSTEMS	3T	Signa HDxt
13	x215	FLAIR	2D	220	256	256	32	5	8802	90	0	125	2200	GE MEDICAL SYSTEMS	1.5T	Signa HDxt
14	x218	FLAIR	2D	220	256	256	34	5	8802	90	0	121	2200	GE MEDICAL SYSTEMS	1.5T	Signa HDxt
15	x220	FLAIR	2D	220	512	512	28	5	9502	90	0	125	2250	GE MEDICAL SYSTEMS	3T	Signa HDxt
16	x249	FLAIR	2D	260	256	256	32	5	8802	90	0	124	2200	GE MEDICAL SYSTEMS	1.5T	Signa HDxt
17	x251	FLAIR	2D	220	384	384	32	5	8000	90	1	120	2200	Philips Medical Systems	1.5T	Intera
18	x253	FLAIR	2D	220	560	560	32	5	11000	90	1	125	2800	Philips Medical Systems	3T	Achieva
19	x257	FLAIR	2D	220	256	256	32	5	8800	90	0	124	2200	GE MEDICAL SYSTEMS	1.5T	Signa HDxt
20	x265	FLAIR	2D	220	256	256	31	5	8800	90	0	126	2200	GE MEDICAL SYSTEMS	1.5T	Signa HDxt
21	x269	FLAIR	2D	220	256	256	32	5	8800	90	0	121	2200	GE MEDICAL SYSTEMS	1.5T	Signa HDxt
22	x275	FLAIR	2D	220	560	560	32	5	11000	90	1	125	2800	Philips Medical Systems	3T	Achieva
23	x282	FLAIR	2D	220	560	560	32	5	11000	90	1	125	2800	Philips Medical Systems	3T	Achieva
24	x289	FLAIR	2D	220	256	256	32	5	8800	90	0	124	2200	GE MEDICAL SYSTEMS	1.5T	Signa HDxt
25	x306	FLAIR	2D	240	512	512	32	5	9000	90	0	132	2250	GE MEDICAL SYSTEMS	3T	Signa HDxt
26	x307	FLAIR	2D	220	512	512	35	5	9000	90	0	137	2250	GE MEDICAL SYSTEMS	3T	Signa HDxt
27	x319	FLAIR	2D	220	1024	1024	32	5	8000	90	1	120	2200	Philips Medical Systems	1.5T	Intera
28	x324	FLAIR	2D	250	512	512	32	5	8800	90	0	124	2200	GE MEDICAL SYSTEMS	1.5T	Signa HDxt
29	x338	FLAIR	2D	230	512	512	40	4	9000	90	0	108	2200	GE MEDICAL SYSTEMS	3T	Signa HDxt
30	x365	FLAIR	2D	220	560	560	40	4	11000	90	1	125	2800	Philips Medical Systems	3T	Achieva
31	x367	FLAIR	2D	220	256	256	35	5	8800	90	0	123	2200	GE MEDICAL SYSTEMS	1.5T	Signa HDxt
#	subj	sequence	acqType	FOV	rows	cols	slices	sliceThickness	TR	flip	numVols	TE	TI	manufacterer	fieldStrength	model
1	x076	T2	2D	220	512	512	32	5	6500	90	0	138	0	GE MEDICAL SYSTEMS	3T	Signa HDxt
2	x077	T2	2D	220	512	512	32	5	5000	90	1	102	0	Philips Medical Systems	3T	Achieva
3	x101	T2	2D	220	512	512	32	5	5000	90	1	102	0	Philips Medical Systems	3T	Achieva
4	x111	T2	2D	220	512	512	32	5	4500	90	1	110	0	Philips Medical Systems	1.5T	Intera
5	x131	T2	2D	230	512	512	32	5	7100	90	0	104	0	GE MEDICAL SYSTEMS	1.5T	SIGNA E
6	x154	T2	2D	240	512	512	32	5	6500	90	0	169	0	GE MEDICAL SYSTEMS	3T	Signa HDxt
7	x170	T2	2D	220	512	512	32	5	7100	90	0	106	0	GE MEDICAL SYSTEMS	1.5T	SIGNA E
8	x172	T2	2D	220	512	512	32	5	7100	90	0	105	0	GE MEDICAL SYSTEMS	1.5T	SIGNA E
9	x186	T2	2D	220	288	288	32	5	4500	90	1	110	0	Philips Medical Systems	1.5T	Intera
10	x190	T2	2D	220	512	512	32	5	4500	90	1	110	0	Philips Medical Systems	1.5T	Intera
11	x191	T2	2D	220	384	384	32	5	4200	120	0	92	0	SIEMENS	3T	Skyra
12	x201	T2	2D	220	512	512	28	5	6500	90	0	152	0	GE MEDICAL SYSTEMS	3T	Signa HDxt
13	x215	T2	2D	220	512	512	32	5	4000	90	0	92	0	GE MEDICAL SYSTEMS	1.5T	Signa HDxt
14	x218	T2	2D	220	512	512	34	5	4000	90	0	98	0	GE MEDICAL SYSTEMS	1.5T	Signa HDxt
15	x220	T2	2D	220	512	512	28	5	6500	90	0	155	0	GE MEDICAL SYSTEMS	3T	Signa HDxt
16	x249	T2	2D	260	512	512	32	5	4000	90	0	91	0	GE MEDICAL SYSTEMS	1.5T	Signa HDxt
17	x251	T2	2D	220	512	512	32	5	4500	90	1	110	0	Philips Medical Systems	1.5T	Intera
18	x253	T2	2D	220	512	512	32	5	5000	90	1	102	0	Philips Medical Systems	3T	Achieva
19	x257	T2	2D	220	512	512	32	5	7100	90	0	102	0	GE MEDICAL SYSTEMS	1.5T	Signa HDxt
20	x265	T2	2D	220	512	512	31	5	4000	160	0	78	0	GE MEDICAL SYSTEMS	1.5T	Signa HDxt
21	x269	T2	2D	220	512	512	32	5	4000	160	0	85	0	GE MEDICAL SYSTEMS	1.5T	Signa HDxt
22	x275	T2	2D	220	512	512	32	5	5000	90	1	102	0	Philips Medical Systems	3T	Achieva
23	x282	T2	2D	220	512	512	32	5	5000	90	1	102	0	Philips Medical Systems	3T	Achieva
24	x289	T2	2D	220	512	512	32	5	7100	90	0	102	0	GE MEDICAL SYSTEMS	1.5T	Signa HDxt
25	x306	T2	2D	240	512	512	32	5	7612	142	0	116	0	GE MEDICAL SYSTEMS	3T	Signa HDxt
26	x307	T2	2D	220	512	512	35	5	8386	142	0	117	0	GE MEDICAL SYSTEMS	3T	Signa HDxt
27	x319	T2	2D	220	512	512	32	5	4500	90	1	110	0	Philips Medical Systems	1.5T	Intera
28	x324	T2	2D	250	512	512	32	5	7100	90	0	101	0	GE MEDICAL SYSTEMS	1.5T	Signa HDxt
29	x338	T2	2D	230	512	512	42	4	7131	142	0	116	0	GE MEDICAL SYSTEMS	3T	Signa HDxt
30	x365	T2	2D	220	640	640	40	4	5000	90	1	105	0	Philips Medical Systems	3T	Achieva
31	x367	T2	2D	220	512	512	35	5	4000	160	0	80	0	GE MEDICAL SYSTEMS	1.5T	Signa HDxt
#	subj	sequence	acqType	FOV	rows	cols	slices	sliceThickness	TR	flip	numVols	TE	TI	manufacterer	fieldStrength	model
1	x076	ADC	2D	220	256	256	32	5	7000	90	0	73	0	GE MEDICAL SYSTEMS	3T	Signa HDxt
2	x077	ADC	2D	220	448	448	32	5	3069	90	1	60	0	Philips Medical Systems	3T	Achieva
3	x101	ADC	2D	220	448	448	32	5	3093	90	1	60	0	Philips Medical Systems	3T	Achieva
4	x111	ADC	2D	220	256	256	32	5	6232	90	1	102	0	Philips Medical Systems	1.5T	Intera
5	x131	ADC	2D	230	256	256	32	5	8000	90	0	90	0	GE MEDICAL SYSTEMS	1.5T	SIGNA E
6	x154	ADC	2D	220	256	256	29	5	7000	90	0	74	0	GE MEDICAL SYSTEMS	3T	Signa HDxt
7	x170	ADC	2D	220	256	256	32	5	8000	90	0	97	0	GE MEDICAL SYSTEMS	1.5T	SIGNA E
8	x172	ADC	2D	220	256	256	32	5	8000	90	0	93	0	GE MEDICAL SYSTEMS	1.5T	SIGNA E
9	x186	ADC	2D	220	256	256	32	5	6232	90	1	102	0	Philips Medical Systems	1.5T	Intera
10	x190	ADC	2D	220	256	256	32	5	6286	90	1	104	0	Philips Medical Systems	1.5T	Intera
11	x191	ADC	2D	220	192	192	32	5	6200	180	0	68	0	SIEMENS	3T	Skyra
12	x201	ADC	2D	220	256	256	29	5	7000	90	0	73	0	GE MEDICAL SYSTEMS	3T	Signa HDxt
13	x215	ADC	2D	220	256	256	32	5	8000	90	0	89	0	GE MEDICAL SYSTEMS	1.5T	Signa HDxt
14	x218	ADC	2D	220	256	256	34	5	8000	90	0	98	0	GE MEDICAL SYSTEMS	1.5T	Signa HDxt
15	x220	ADC	2D	220	256	256	28	5	7000	90	0	73	0	GE MEDICAL SYSTEMS	3T	Signa HDxt
16	x249	ADC	2D	260	256	256	32	5	8000	90	0	88	0	GE MEDICAL SYSTEMS	1.5T	Signa HDxt
17	x251	ADC	2D	220	256	256	32	5	6232	90	1	102	0	Philips Medical Systems	1.5T	Intera
18	x253	ADC	2D	220	448	448	32	5	3069	90	1	60	0	Philips Medical Systems	3T	Achieva
19	x257	ADC	2D	220	256	256	32	5	8000	90	0	73	0	GE MEDICAL SYSTEMS	1.5T	Signa HDxt
20	x265	ADC	2D	240	256	256	32	5	8000	90	0	89	0	GE MEDICAL SYSTEMS	1.5T	Signa HDxt
21	x269	ADC	2D	240	256	256	32	5	8000	90	0	97	0	GE MEDICAL SYSTEMS	1.5T	Signa HDxt
22	x275	ADC	2D	220	448	448	32	5	3071	90	1	60	0	Philips Medical Systems	3T	Achieva
23	x282	ADC	2D	220	448	448	32	5	3069	90	1	60	0	Philips Medical Systems	3T	Achieva
24	x289	ADC	2D	220	256	256	32	5	8000	90	0	73	0	GE MEDICAL SYSTEMS	1.5T	Signa HDxt
25	x306	ADC	2D	240	256	256	32	5	8000	90	0	72	0	GE MEDICAL SYSTEMS	3T	Signa HDxt
26	x307	ADC	2D	240	256	256	59	3	8000	90	0	86	0	GE MEDICAL SYSTEMS	3T	Signa HDxt
27	x319	ADC	2D	220	128	128	32	5	8000	90	1	92	0	Philips Medical Systems	1.5T	Intera
28	x324	ADC	2D	250	256	256	32	5	8000	90	0	72	0	GE MEDICAL SYSTEMS	1.5T	Signa HDxt
29	x338	ADC	2D	240	256	256	55	3	7800	90	0	86	0	GE MEDICAL SYSTEMS	3T	Signa HDxt
30	x365	ADC	2D	220	448	448	48	3	8000	90	1	60	0	Philips Medical Systems	3T	Achieva
31	x367	ADC	2D	220	256	256	35	5	8000	90	0	89	0	GE MEDICAL SYSTEMS	1.5T	Signa HDxt
#	subj	sequence	acqType	FOV	rows	cols	slices	sliceThickness	TR	flip	numVols	TE	TI	manufacterer	fieldStrength	model
1	x076	SWI	2D	240	512	512	76	2	5000	90	0	25	0	GE MEDICAL SYSTEMS	3T	Signa HDxt
2	x077	SWI	3D	240	512	512	190	1	30	15	1	43	0	Philips Medical Systems	1.5T	Intera
3	x101	SWI	3D	220	512	512	512	0	16	15	1	23	0	Philips Medical Systems	3T	Achieva
4	x111	SWI	3D	220	480	480	480	0	30	15	1	43	0	Philips Medical Systems	1.5T	Intera
5	x131	SWI	2D	240	512	512	512	0	1700	40	0	39	0	GE MEDICAL SYSTEMS	1.5T	SIGNA E
6	x154	SWI	2D	240	512	512	68	2	5000	90	0	25	0	GE MEDICAL SYSTEMS	3T	Signa HDxt
7	x170	SWI	2D	240	512	512	512	0	1700	40	0	39	0	GE MEDICAL SYSTEMS	1.5T	SIGNA E
8	x172	SWI	2D	240	512	512	512	0	1700	40	0	39	0	GE MEDICAL SYSTEMS	1.5T	SIGNA E
9	x186	SWI	3D	240	512	512	512	0	30	15	1	43	0	Philips Medical Systems	1.5T	Intera
10	x190	SWI	3D	240	512	512	512	0	30	15	1	43	0	Philips Medical Systems	1.5T	Intera
11	x191	SWI	3D	179	260	320	96	2	28	15	0	20	0	SIEMENS	3T	Skyra
12	x201	SWI	3D	240	512	512	116	2	40	15	0	24	0	GE MEDICAL SYSTEMS	3T	Signa HDxt
13	x215	SWI	2D	240	512	512	67	2	5000	90	0	22	0	GE MEDICAL SYSTEMS	1.5T	Signa HDxt
14	x218	SWI	2D	240	512	512	512	0	5000	90	0	25	0	GE MEDICAL SYSTEMS	1.5T	Signa HDxt
15	x220	SWI	2D	240	512	512	55	3	5000	90	0	25	0	GE MEDICAL SYSTEMS	3T	Signa HDxt
16	x249	SWI	2D	240	512	512	66	2	5000	90	0	25	0	GE MEDICAL SYSTEMS	1.5T	Signa HDxt
17	x251	SWI	3D	220	512	512	160	1	34	15	1	49	0	Philips Medical Systems	1.5T	Intera
18	x253	SWI	3D	240	560	560	70	2	13	15	1	18	0	Philips Medical Systems	3T	Achieva
19	x257	SWI	3D	220	512	512	108	2	77	20	0	49	0	GE MEDICAL SYSTEMS	1.5T	Signa HDxt
20	x265	SWI	2D	240	512	512	64	2	5000	90	0	25	0	GE MEDICAL SYSTEMS	1.5T	Signa HDxt
21	x269	SWI	2D	240	512	512	68	2	5000	90	0	25	0	GE MEDICAL SYSTEMS	1.5T	Signa HDxt
22	x275	SWI	3D	240	560	560	70	2	13	15	1	18	0	Philips Medical Systems	3T	Achieva
23	x282	SWI	3D	220	528	528	70	2	13	15	1	18	0	Philips Medical Systems	3T	Achieva
24	x289	SWI	3D	220	512	512	108	2	77	20	0	49	0	GE MEDICAL SYSTEMS	1.5T	Signa HDxt
25	x306	SWI	2D	240	512	512	60	3	6000	60	0	30	0	GE MEDICAL SYSTEMS	3T	Signa HDxt
26	x307	SWI	2D	240	512	512	67	3	5000	60	0	30	0	GE MEDICAL SYSTEMS	3T	Signa HDxt
27	x319	SWI	3D	220	512	512	139	1	34	15	1	49	0	Philips Medical Systems	1.5T	Intera
28	x324	SWI	3D	240	512	512	108	1	76	20	0	49	0	GE MEDICAL SYSTEMS	1.5T	Signa HDxt
29	x338	SWI	3D	260	512	512	132	1	40	15	0	24	0	GE MEDICAL SYSTEMS	3T	Signa HDxt
30	x365	SWI	3D	220	400	400	60	3	14	15	1	20	0	Philips Medical Systems	3T	Achieva
31	x367	SWI	2D	220	512	512	70	3	5000	90	0	25	0	GE MEDICAL SYSTEMS	1.5T	Signa HDxt
#	subj	sequence	acqType	FOV	rows	cols	slices	sliceThickness	TR	flip	numVols	TE	TI	manufacterer	fieldStrength	model
