# Supplementary material for: Biologically-informed deep neural networks provide quantitative assessment of intratumoral heterogeneity in post-treatment glioblastoma
Source: Research Square preprint supplement (doi:10.21203/rs.3.rs-3891425/v1), 2024-03-27
Supplement: Supplementary file 2 [file cdeaf0380ef8969d98e258de.xlsx]

## Sheet: IHC-RNA corrs
	H&E	SOX2_LI	CD68_LI	Ki67_LI	NeuN_LI
SAMD11	-0.09733	-0.27176	0.043373	-0.02685	0.07156
NOC2L	-0.13878	-0.19955	-0.08213	-0.09904	-0.18452
KLHL17	-0.1474	-0.03484	0.013083	-0.10082	-0.14061
HES4	0.172291	0.39218	-0.25023	0.185298	0.004665
ISG15	-0.10582	0.159077	0.115001	-0.14012	-0.0783
AGRN	0.390034	0.206097	-0.14241	0.408897	-0.22059
C1orf159	-0.19111	-0.27593	0.24043	-0.09032	0.077313
TNFRSF18	-0.07105	0.05398	0.219124	-0.19657	-0.15725
TNFRSF4	0.431944	0.334949	0.110664	0.280356	-0.28947
SDF4	0.049735	-0.11467	-0.02586	0.051225	-0.24537
B3GALT6	0.118306	0.107473	-0.1352	0.242979	-0.18714
UBE2J2	-0.23004	0.030899	-0.02395	0.080955	0.187862
SCNN1D	-0.04455	0.109555	-0.04225	-0.00154	0.172807
ACAP3	-0.12822	-0.0457	-0.01302	0.048448	0.004588
PUSL1	-0.14266	-0.04836	0.091663	0.168485	0.10948
DVL1	-0.49884	-0.3632	-0.05975	-0.238	0.377828
MXRA8	-0.05066	-0.0331	0.378604	-0.01029	-0.0747
AURKAIP1	-0.20762	-0.16059	-0.02915	0.055808	0.024602
CCNL2	0.18697	0.126359	0.098392	0.176278	-0.25262
MRPL20	-0.44519	-0.26951	-0.04188	-0.04342	0.329414
ANKRD65	-0.4965	-0.56528	0.314399	-0.34009	0.162955
VWA1	-0.32791	-0.58341	0.351751	-0.28551	0.053594
ATAD3C	-0.20969	-0.32623	0.137836	0.03057	-0.0307
ATAD3B	0.188527	-0.08347	0.000569	0.17946	-0.13785
ATAD3A	0.183756	0.289076	-0.01818	0.321039	-0.15158
TMEM240	-0.07043	-0.05616	0.03292	0.065683	0.429254
SSU72	-0.27359	-0.07554	0.27405	-0.10496	0.189526
MIB2	-0.09655	-0.12772	0.021624	0.046105	0.072567
CDK11B	-0.04783	0.175307	-0.20759	-0.09253	0.108975
SLC35E2B	-0.03347	-0.13966	-0.06813	0.039255	0.039396
NADK	-0.18267	-0.34147	0.135949	0.113289	-0.03013
GNB1	-0.30521	-0.34286	0.008978	-0.01523	0.401849
CALML6	-0.19082	0.086786	-0.09214	0.173244	0.091102
TMEM52	0.06389	-0.20664	-0.12923	0.125618	0.15189
GABRD	-0.30734	-0.10995	-0.20022	0.053293	0.503656
PRKCZ	-0.24701	-0.19073	-0.22613	0.050697	0.161298
SKI	-0.1257	-0.00304	-0.14711	0.330709	0.353527
MORN1	0.05673	0.301961	0.071184	-0.09027	0.006121
RER1	-0.0968	-0.29588	0.262227	0.105803	-0.06237
PEX10	0.025366	-0.17067	0.263858	-0.23769	-0.16973
PLCH2	-0.46402	-0.54158	0.310705	-0.36352	0.122937
PANK4	-0.02508	0.008288	-0.15561	0.36393	0.060431
HES5	0.327581	0.338829	-0.33707	0.186458	-0.11623
TNFRSF14	0.056396	0.00194	0.232366	-0.02572	-0.2166
MMEL1	-0.06894	0.02394	-0.08731	0.049182	0.139576
PRDM16	-0.51482	-0.34192	0.031564	-0.14272	0.591664
ARHGEF16	-0.10934	-0.24842	0.349021	-0.16613	-0.17729
MEGF6	-0.2665	-0.20159	0.066392	-0.19549	0.153956
TPRG1L	-0.4089	-0.33276	-0.02873	-0.20405	0.535192
WRAP73	-0.03358	-0.12748	0.109554	0.075999	-0.11896
TP73	-0.03596	-0.06746	0.034616	-0.14287	-0.06325
SMIM1	-0.10769	-0.31271	0.202693	-0.06827	-0.05522
LRRC47	-0.19504	-0.07648	0.167799	-0.24638	0.006282
CEP104	-0.57547	-0.68285	0.283725	-0.34586	0.234353
DFFB	-0.41969	-0.27402	-0.34774	-0.17579	0.142387
C1orf174	-0.15933	-0.05255	0.244235	-0.03256	-0.11181
AJAP1	-0.41688	-0.45624	-0.18557	-0.15507	0.464394
NPHP4	-0.21261	0.140598	0.241617	-0.00228	-0.07099
KCNAB2	-0.40395	-0.20925	-0.2304	-0.01274	0.487989
CHD5	-0.40469	-0.25195	-0.34444	-0.0678	0.585781
RPL22	-0.04409	0.089343	-0.22594	0.219247	0.113289
RNF207	0.074489	0.018025	-0.32874	0.57986	0.07882
ICMT	-0.28334	-0.23595	-0.09786	-0.12602	0.221014
GPR153	0.181909	0.129631	-0.10919	0.254964	0.092939
ACOT7	-0.37835	-0.36449	-0.0396	-0.01802	0.474464
HES2	0.088434	0.048121	0.189412	-0.04281	-0.16665
ESPN	0.00149	-0.07755	-0.07851	-0.02688	0.274348
TNFRSF25	-0.32061	-0.06078	0.003247	0.002599	0.170898
PLEKHG5	-0.32246	-0.21358	-0.24342	0.154646	0.412433
NOL9	-0.07498	0.006745	0.17783	0.094476	-0.13981
TAS1R1	-0.00972	0.120049	-0.23752	0.099705	0.061607
ZBTB48	-0.28958	-0.20645	0.049495	0.0128	0.106649
KLHL21	-0.26315	-0.20007	0.219709	-0.28303	-0.12715
PHF13	0.012933	0.117171	0.014874	0.075844	0.134391
THAP3	0.024474	-0.03741	-0.03251	-0.06396	-0.14164
DNAJC11	-0.06024	-0.06889	-0.2508	-0.04759	0.069449
CAMTA1	-0.37448	-0.12543	-0.21446	-0.0741	0.538267
VAMP3	-0.4047	-0.50704	0.437538	-0.44929	-0.02523
PER3	-0.35113	-0.20161	0.106973	-0.32819	0.090431
UTS2	-0.07078	0.244362	-0.14401	-0.17942	-0.02915
TNFRSF9	-0.2141	-0.09648	0.422442	-0.10669	-0.03357
PARK7	-0.03698	0.10135	0.081183	-0.04555	-0.05622
ERRFI1	0.407675	0.356083	-0.0924	0.225503	-0.10481
SLC45A1	-0.20823	-0.11844	0.131068	-0.21376	0.057456
RERE	-0.3313	-0.16219	-0.11996	-0.15277	0.258206
ENO1	0.242674	0.174982	-0.00477	0.199398	-0.02506
SLC2A5	-0.01105	0.077566	0.168527	-0.00586	-0.21937
H6PD	0.024769	0.100095	0.367328	-0.16862	-0.27235
SPSB1	0.139935	-0.06417	0.20701	0.027796	-0.1887
SLC25A33	-0.2572	-0.10329	-0.097	-0.18317	0.163615
TMEM201	0.134131	0.071661	-0.14161	0.10439	-0.0528
PIK3CD	-0.05796	-0.01609	0.029778	-0.05255	-0.03425
CLSTN1	-0.23098	-0.06602	-0.09692	0.20601	0.270074
CTNNBIP1	-0.21274	-0.2887	0.017895	-0.07505	0.185331
LZIC	-0.07727	0.043343	0.077939	-0.24351	-0.05683
NMNAT1	0.015202	-0.04939	0.342155	0.153503	-0.0128
RBP7	-0.37426	-0.51403	0.32789	-0.37561	0.036189
UBE4B	-0.34063	-0.52536	0.164207	-0.26221	0.217355
KIF1B	-0.47295	-0.34056	-0.03051	-0.28171	0.425455
PGD	0.02758	-0.13526	0.247736	0.050317	-0.12028
CORT	-0.2677	-0.21654	0.295943	-0.21	0.134007
DFFA	0.134568	-0.00803	0.266882	-0.07363	-0.03885
PEX14	-0.465	-0.3598	0.032132	-0.03237	0.528157
CASZ1	0.057716	0.148437	0.017322	-0.19714	-0.02193
TARDBP	0.0748	0.069645	0.005752	-0.11844	-0.20949
MASP2	-0.20062	-0.08168	-0.00925	-0.02728	-0.03467
SRM	-0.06356	0.086325	-0.0201	0.111763	-0.12532
EXOSC10	-0.13932	-0.27902	0.19252	0.193641	0.041343
MTOR	-0.01518	-0.04081	0.074604	0.109422	0.106453
UBIAD1	-0.13125	-0.28183	0.34773	-0.20168	0.094274
FBXO2	-0.50801	-0.52753	0.141435	-0.27745	0.515195
FBXO44	-0.51606	-0.24059	-0.16385	-0.109	0.517364
FBXO6	-0.1203	0.113741	0.240513	-0.01237	0.012689
MAD2L2	0.180114	0.077335	0.140837	0.178974	-0.04111
DRAXIN	0.060234	0.194909	0.18387	0.093621	-0.07741
AGTRAP	-0.17257	-0.28069	0.230571	-0.19587	-0.03357
MTHFR	-0.4352	-0.39374	-0.04373	-0.09857	0.093674
CLCN6	-0.4803	-0.34785	0.126103	-0.39261	0.170701
NPPA	0.290184	0.246225	-0.18668	0.044297	-0.13083
NPPB	0.043186	0.118032	0.179264	-0.01719	-0.10927
KIAA2013	-0.18854	-0.408	0.187799	-0.19	-0.1358
PLOD1	0.144972	0.123944	0.085545	0.179053	-0.30434
MFN2	-0.30495	-0.12283	0.079477	-0.17976	0.129867
MIIP	0.085787	0.098301	0.118256	0.254166	-0.20495
TNFRSF8	0.114786	0.206814	0.092765	-0.01461	-0.09292
TNFRSF1B	-0.22288	-0.23562	0.348628	-0.01987	-0.24356
VPS13D	0.05893	0.135985	-0.18454	-0.13522	0.179431
DHRS3	-0.00347	-0.12853	0.327349	-0.13768	-0.11621
C1orf158	-0.02319	0.139095	0.246765	-0.19249	-0.1136
LRRC38	-0.25232	-0.1336	-0.17392	0.076159	0.473567
PDPN	0.221983	0.299939	0.101327	0.077536	-0.20638
PRDM2	-0.42569	-0.38229	-0.09666	-0.3034	0.466894
KAZN	-0.18841	-0.37273	0.236343	-0.34331	-0.05031
TMEM51	0.093008	-0.07191	0.18308	-0.08075	-0.34627
FHAD1	-0.11354	0.114456	0.146533	-0.21754	-0.15292
EFHD2	-0.2431	0.02689	-0.26934	-0.09031	0.280223
CELA2B	-0.11393	-0.07985	-0.04198	-0.16485	0.034388
CASP9	0.108654	0.148113	0.01238	0.254908	-0.19283
DNAJC16	-0.30551	-0.24244	-0.00371	-0.17803	0.234542
AGMAT	-0.1435	-0.08447	-0.07693	-0.00341	0.2598
DDI2	-0.07674	-0.09328	0.020444	-0.06386	-0.17992
RSC1A1	0.157592	0.009736	0.179776	-0.0324	-0.1165
PLEKHM2	-0.34534	-0.11474	-0.26471	-0.13788	0.459837
SLC25A34	-0.00326	-0.00396	-0.13693	0.006622	0.29476
FBLIM1	0.091705	0.028809	-0.0217	0.121728	-0.22644
UQCRHL	0.151423	0.311901	-0.05121	0.220521	0.044897
SPEN	-0.34005	-0.30103	0.047304	-0.3994	0.089818
ZBTB17	-0.40462	-0.25746	0.042196	-0.22623	0.067471
HSPB7	0.046507	0.022471	0.203149	-0.01585	0.180229
CLCNKA	0.052329	-0.11218	0.111525	0.04859	0.015374
FAM131C	-0.28462	-0.47423	0.436821	-0.31723	-0.13043
EPHA2	0.15652	0.110152	0.024229	0.340665	-0.02048
ARHGEF19	-0.18212	-0.22339	-0.03303	-0.02289	0.177255
FBXO42	0.052083	0.197753	0.269097	0.005706	-0.12565
SZRD1	-0.09301	-0.07732	0.01082	-0.09731	0.082428
SPATA21	0.024799	-0.0511	0.12437	-0.11744	-0.1117
NECAP2	-0.05305	0.064178	0.30573	-0.04063	-0.16431
NBPF1	-0.00692	0.15406	0.143396	-0.07317	-0.18989
CROCC	-0.13052	-0.10971	0.025646	0.102594	0.181906
ATP13A2	-0.45111	-0.19376	-0.09176	0.004684	0.489702
SDHB	-0.22063	-0.3461	-0.09554	-0.13043	0.292358
PADI2	-0.40265	-0.50966	0.390919	-0.43168	-0.00595
PADI4	-0.15056	-0.17963	-0.03707	-0.16384	0.295791
RCC2	0.281625	0.378496	0.072086	0.250273	-0.3248
ARHGEF10L	-0.01894	0.220133	-0.0495	0.076278	0.037912
IGSF21	-0.05034	0.141042	-0.39969	0.201427	0.194714
KLHDC7A	-0.09282	0.101348	-0.00752	-0.05066	0.09139
PAX7	-0.21204	-0.28021	-0.15459	-0.12631	0.375224
ALDH4A1	-0.2994	-0.02622	0.132483	0.034822	0.23009
IFFO2	0.166964	0.205098	-0.04467	-0.02623	-0.14016
UBR4	0.03724	0.062993	0.061466	0.162877	-0.09702
EMC1	-0.00875	0.087546	0.17489	0.066782	-0.13529
MRTO4	0.12212	0.284902	0.091575	0.074927	-0.15834
AKR7A3	-0.12216	-0.00629	-0.0736	-0.02538	0.184284
AKR7A2	-0.17729	-0.27147	0.172439	-0.08344	0.243162
CAPZB	-0.12081	-0.13711	0.244728	-0.0105	-0.0845
TMCO4	-0.08868	0.014583	0.145871	-0.08315	-0.21899
OTUD3	-0.2584	0.023474	-0.0434	-0.07542	0.164429
PLA2G2A	0.069764	0.168717	-0.03534	0.469704	-0.09785
PLA2G5	-0.22938	-0.00915	0.027886	0.0377	0.321331
PLA2G2D	0.070437	0.034417	0.087755	0.021509	-0.03077
UBXN10	-0.24975	-0.2693	0.14384	-0.16584	0.411969
CAMK2N1	-0.53843	-0.39116	-0.1442	-0.15604	0.588012
MUL1	0.012738	-0.006	0.248094	0.020639	-0.05194
FAM43B	0.106624	0.235442	-0.0216	0.067069	0.086657
CDA	0.170158	0.055235	-0.00823	0.358316	-0.05088
PINK1	-0.42376	-0.26519	-0.06843	-0.30035	0.497688
DDOST	0.01371	0.145025	-0.02501	-0.02756	-0.19228
KIF17	-0.27625	-0.09662	-0.13626	-0.1375	0.427649
SH2D5	-0.38444	-0.17918	-0.21739	0.046	0.490131
HP1BP3	-0.03908	0.109274	0.028398	-0.04297	-0.0404
EIF4G3	-0.34646	-0.18138	-0.0539	-0.14204	0.011639
ECE1	-0.04842	-0.11507	0.089296	-0.037	-0.11434
NBPF3	0.070622	-0.03456	-0.14355	-0.15316	0.13102
ALPL	-0.0499	-0.06569	0.188505	0.259755	-0.04915
RAP1GAP	-0.31232	-0.24289	-0.33034	-0.0359	0.576806
USP48	-0.3487	-0.38408	0.056916	-0.30496	0.127857
HSPG2	0.014931	0.061605	0.049092	0.400156	0.02443
CDC42	-0.1643	-0.31405	0.27171	-0.23788	-0.16188
WNT4	-0.16974	-0.22102	0.07104	0.042893	0.270103
ZBTB40	-0.01354	0.063741	0.078574	-0.13514	-0.21166
EPHA8	-0.18476	0.024421	-0.25837	0.218235	0.234639
C1QA	-0.22772	-0.26142	0.209415	-0.09316	-0.22767
C1QC	-0.23295	-0.26781	0.315541	-0.08268	-0.22926
C1QB	-0.22632	-0.27761	0.232921	-0.05194	-0.18575
EPHB2	-0.2317	-0.21621	0.485528	-0.20019	-0.10306
KDM1A	0.186707	0.435344	-0.04114	0.274602	-0.07363
LUZP1	-0.12551	0.107551	-0.22601	0.038294	0.254122
HTR1D	0.042437	0.109307	-0.04291	0.044006	0.017507
HNRNPR	0.140871	0.164134	0.095212	-0.04044	-0.0975
ZNF436	-0.09867	0.069007	-0.0209	0.141126	0.1573
TCEA3	-0.13438	-0.01579	0.2111	-0.09442	0.181315
ASAP3	0.02318	0.194602	0.100189	0.283054	-0.08207
E2F2	0.164352	0.171405	-0.11448	0.246396	-0.26168
ID3	0.05299	0.067996	0.004184	0.465836	-0.10748
RPL11	-0.00638	-0.09524	0.101075	0.135784	-0.14714
PITHD1	-0.60682	-0.48884	-0.0154	-0.34421	0.478564
LYPLA2	0.002736	-0.10446	0.257154	0.154029	-0.10174
GALE	-0.14593	-0.05684	0.402503	-0.02019	0.011069
HMGCL	-0.09361	-0.06849	0.337713	0.009319	-0.01241
FUCA1	-0.231	-0.2888	0.582671	-0.23128	-0.17472
PNRC2	-0.29329	-0.29626	-0.24674	-0.19557	0.360985
SRSF10	0.237335	0.337816	0.092136	0.081707	-0.22013
IL22RA1	-0.14517	-0.06373	0.13907	-0.08878	0.233731
IFNLR1	-0.24075	-0.04899	-0.03597	-0.10214	0.161591
GRHL3	0.143559	0.167881	-0.12891	-0.12603	-0.11672
STPG1	-0.26218	-0.36332	0.233747	-0.23074	0.08172
NIPAL3	-0.44755	-0.66241	0.284044	-0.37518	0.148377
RCAN3	-0.43368	-0.47651	0.251449	-0.36994	-0.16297
NCMAP	0.171429	0.02998	-0.01752	0.495834	-0.12493
SRRM1	-0.08848	0.102689	0.179176	-0.14749	-0.22027
CLIC4	-0.2807	-0.409	0.099669	-0.18498	-0.08499
RUNX3	-0.19438	-0.13504	0.212358	-0.17884	-0.25274
SYF2	-0.2075	-0.11563	0.007221	-0.24333	0.064602
RHD	-0.09035	0.060803	-0.01843	0.057251	-0.20236
TMEM50A	-0.21611	-0.33386	0.260485	-0.08673	-0.07259
RHCE	-0.13766	-0.25291	0.066801	-0.18383	-0.04749
LDLRAP1	-0.2209	-0.40191	0.404861	-0.33188	-0.06324
MAN1C1	-0.28802	-0.3218	0.316903	-0.12935	0.172514
MTFR1L	-0.06946	0.121455	-0.01344	0.01027	0.218067
AUNIP	-0.06429	-0.10749	0.063789	-0.15606	-0.16232
PAQR7	-0.08096	0.064014	0.248723	0.047413	-0.14055
STMN1	-0.38304	-0.48904	0.114016	-0.26017	0.188362
PAFAH2	-0.12191	-0.23899	0.447932	-0.1531	-0.12435
EXTL1	-0.17908	-0.0095	0.108284	-0.01391	0.121739
PDIK1L	0.08556	0.023779	0.115767	0.013072	0.073549
FAM110D	-0.02575	-0.01031	0.225165	-0.12262	-0.0928
ZNF593	0.139072	0.12751	0.125329	0.232584	-0.25426
CNKSR1	-0.18767	-0.22012	0.028807	-0.16072	-0.01203
CEP85	-0.25171	-0.24954	0.379103	-0.25108	-0.19457
SH3BGRL3	-0.17689	-0.18528	0.131898	-0.11499	-0.1245
UBXN11	0.046019	0.242756	0.096285	-0.08584	-0.08691
CD52	-0.14472	-0.21395	0.153242	-0.08654	-0.0484
ZNF683	-0.18717	-0.18476	-0.07838	-0.13645	-0.1418
LIN28A	0.06709	-0.07417	-0.00657	0.130887	0.013934
DHDDS	-0.12417	-0.25501	0.137626	-0.22422	-0.08341
HMGN2	0.125621	0.133882	0.021213	0.015079	-0.03006
RPS6KA1	-0.34023	-0.4077	0.311411	-0.32602	-0.06354
ARID1A	-0.08529	-0.04897	0.411999	-0.01349	-0.27507
PIGV	-0.04937	0.025173	0.257035	-0.23847	0.061279
ZDHHC18	0.003086	-0.01533	0.255972	-0.02102	-0.16692
SFN	-0.29387	-0.26143	0.100839	0.022613	0.382225
GPN2	-0.07914	-0.15199	0.365	-0.03944	-0.13696
GPATCH3	-0.2746	-0.16077	-0.1193	-0.18104	0.198046
NUDC	-0.29434	-0.2739	-0.07608	-0.07956	0.347815
TRNP1	0.064156	0.110092	-0.2069	0.058466	0.386506
SLC9A1	-0.10336	0.05655	0.105845	0.193383	0.147434
WDTC1	-0.33164	-0.2765	0.321887	-0.15967	0.008088
TMEM222	-0.1813	-0.03888	0.375159	-0.09058	0.052809
SYTL1	-0.22285	-0.22031	0.106891	-0.00017	0.099924
MAP3K6	0.162268	0.220765	0.183312	0.260366	-0.11716
FCN3	0.165493	-0.07597	0.02081	0.190908	-0.09205
CD164L2	-0.14335	0.064274	-0.0426	0.150659	0.341949
GPR3	0.118211	0.305613	-0.27971	0.202851	0.080903
WASF2	-0.21019	-0.31193	0.296759	-0.23636	-0.01711
AHDC1	-0.12723	0.21994	-0.00741	-0.06146	0.057485
FGR	-0.13926	-0.09257	0.23097	-0.22335	-0.0247
IFI6	-0.22392	0.025831	0.044975	-0.22299	-0.00842
FAM76A	-0.21946	-0.44804	0.054751	-0.23359	0.12139
STX12	-0.21013	-0.34522	0.207838	-0.12112	0.021715
PPP1R8	0.112378	0.00073	0.08818	-0.05661	-0.06719
THEMIS2	-0.13058	-0.28886	0.497315	-0.15224	-0.29986
RPA2	-0.03371	-0.08959	0.135002	-0.22626	-0.17491
SMPDL3B	0.026385	0.230933	-0.02938	-0.01473	0.046558
XKR8	-0.28183	-0.3973	0.424633	-0.11631	-0.08082
EYA3	-0.34429	-0.33399	-0.05232	-0.17851	0.046374
PTAFR	-0.38573	-0.41467	0.380784	-0.31366	-0.08016
DNAJC8	-0.50637	-0.35885	0.255016	-0.27025	0.385164
SESN2	0.156907	0.188723	-0.0489	0.195266	-0.08533
MED18	-0.29296	-0.23708	0.287744	-0.2092	-0.1715
PHACTR4	0.029237	0.244032	0.18359	-0.13332	-0.25136
RCC1	0.240863	0.015373	0.125339	0.295481	-0.31297
TRNAU1AP	-0.22392	-0.1978	0.144289	-0.15717	-0.15232
RAB42	-0.04637	-0.231	0.574796	-0.19827	-0.21548
TAF12	-0.05162	-0.02608	0.234458	0.007728	-0.06309
GMEB1	0.189406	0.083195	-0.22219	0.215281	-0.08785
YTHDF2	0.095508	0.227631	-0.05504	-0.07571	0.007055
EPB41	-0.1345	0.13976	-0.07095	-0.03691	0.113989
SRSF4	-0.21755	-0.10689	0.109281	-0.07194	-0.11497
MECR	-0.16327	-0.03845	-0.17014	-0.20079	0.03018
PTPRU	-0.0109	-0.19216	0.309592	-0.01819	-0.07529
MATN1	-0.24038	-0.33202	-0.00226	-0.30936	-0.05001
LAPTM5	-0.12507	-0.19609	0.290042	-0.0672	-0.23596
SDC3	0.248492	0.369026	-0.10596	0.231717	-0.14272
PUM1	-0.24007	0.005604	-0.00259	0.035501	0.343733
NKAIN1	-0.33139	-0.43567	0.149779	-0.40076	0.134437
SNRNP40	-0.17447	-0.11429	0.300426	-0.21673	-0.02559
ZCCHC17	-0.59937	-0.36132	0.043968	-0.12983	0.599037
FABP3	-0.41378	-0.37715	-0.22695	-0.14835	0.211912
SERINC2	0.035799	0.080781	0.316979	0.122466	-0.12817
TINAGL1	-0.41737	-0.4055	0.320048	-0.14916	0.132891
PEF1	-0.29428	-0.26138	0.232382	0.029604	0.360842
COL16A1	-0.1141	-0.11256	0.42915	-0.09325	-0.14523
SPOCD1	-0.0849	0.000179	0.060832	0.035969	-0.00312
PTP4A2	-0.44525	-0.41429	0.320677	-0.47501	0.033847
KHDRBS1	-0.0489	0.069891	0.072071	-0.14457	-0.05137
TMEM39B	-0.05093	-0.15618	0.020761	0.051358	-0.18362
KPNA6	-0.33924	-0.31855	0.155326	-0.32323	0.168477
TXLNA	-0.21392	-0.17358	-0.03875	-0.13233	-0.12606
CCDC28B	0.200321	0.175787	-0.23521	0.196268	0.075593
IQCC	0.029452	0.014192	-0.05368	0.39763	-0.17059
DCDC2B	0.093937	0.114652	-0.087	-0.03681	-0.04546
TMEM234	-0.1966	-0.16797	0.107627	-0.01118	-0.15568
EIF3I	-0.05007	-0.017	0.137756	0.22755	0.047402
FAM167B	-0.14501	-0.02177	-0.02207	-0.01013	-0.17403
LCK	-0.02575	-0.09077	0.033415	-0.05226	-0.04741
HDAC1	0.165557	0.205454	0.057074	-0.03251	-0.01858
MARCKSL1	-0.07816	-0.26734	0.211148	-0.1057	-0.0855
FAM229A	-0.28232	-0.01358	-0.02518	-0.10508	0.18294
TSSK3	0.035317	0.061357	0.193424	-0.13871	-0.20095
BSDC1	-0.40859	-0.36046	-0.07714	-0.17671	0.312719
ZBTB8B	0.069753	0.060703	-0.2058	0.245478	0.247942
ZBTB8A	0.298477	0.273573	-0.11084	-0.00035	-0.07258
ZBTB8OS	-0.26547	-0.12224	0.250954	-0.00042	0.245733
RBBP4	0.104418	0.352131	-0.19964	0.019923	-0.12176
KIAA1522	-0.12045	0.126079	0.07663	-0.01598	0.136517
S100PBP	0.02785	-0.07227	0.140685	0.119409	-0.19274
FNDC5	0.13503	0.243094	-0.31358	-0.01274	0.245195
HPCA	-0.40193	-0.15289	-0.26343	-0.0386	0.605187
TMEM54	-0.0224	0.002864	0.163651	-0.1084	0.061583
RNF19B	-0.17036	-0.22492	0.153677	0.054013	0.221437
AK2	0.071853	0.084284	0.402835	0.121684	-0.34304
TRIM62	-0.20322	-0.4801	0.204864	-0.2645	-0.01508
ZNF362	0.037764	0.028673	-0.1529	0.051348	0.094333
PHC2	0.034698	-0.094	0.235609	-0.08407	-0.34135
ZSCAN20	-0.07172	0.008318	0.025687	-0.16387	-0.25004
CSMD2	0.171413	0.25808	-0.33736	0.291643	0.028703
C1orf94	0.307692	0.34249	0.050073	0.105262	-0.18129
GJB5	-0.30068	-0.1303	-0.02842	0.012146	0.321756
GJB3	-0.12539	-0.25767	-0.03944	-0.03616	-0.0011
GJA4	0.108198	-0.08906	0.192738	0.10944	-0.09587
SMIM12	-0.19042	-0.34977	0.015393	0.0514	0.453434
DLGAP3	-0.27697	-0.08127	-0.23224	0.122057	0.388568
ZMYM6	-0.0429	-0.14005	0.089635	-0.03659	-0.11991
ZMYM1	0.07582	0.346229	-0.10647	0.169698	0.003826
SFPQ	0.230358	0.336244	-0.11688	0.282202	-0.22263
ZMYM4	-0.04487	0.145129	-0.00311	-0.15403	-0.08731
KIAA0319L	-0.34261	-0.19434	0.196603	-0.18804	0.230005
NCDN	-0.4236	-0.21978	-0.23499	-0.00595	0.602052
TFAP2E	-0.01732	-0.05788	0.039194	0.013201	0.022348
PSMB2	-0.04887	0.072096	0.214789	-0.0422	-0.00806
C1orf216	-0.16875	-0.03762	-0.1032	0.038678	0.266587
CLSPN	0.229081	0.315418	0.003379	0.305585	-0.16496
AGO4	-0.13074	-0.12114	-0.02935	-0.25477	-0.11473
AGO1	-0.08957	0.143311	0.378493	-0.23352	-0.28337
AGO3	-0.26873	-0.25288	-0.05231	-0.22075	0.18953
TEKT2	-0.07318	0.075144	0.164854	-0.12189	-0.10849
ADPRHL2	-0.00977	-0.07147	0.221746	0.059745	0.028074
COL8A2	-0.04823	0.110427	0.128742	-0.18479	-0.14976
TRAPPC3	-0.19731	-0.17773	0.4307	0.009857	-0.23694
MAP7D1	-0.42587	-0.60241	0.267295	-0.3355	0.172011
THRAP3	-0.12535	-0.08716	0.034479	-0.36367	0.008888
SH3D21	-0.11803	-0.16678	0.4516	-0.04034	-0.1735
EVA1B	0.363356	0.223961	0.178816	0.289972	-0.09605
STK40	-0.10763	-0.2096	0.123369	-0.05321	0.222534
LSM10	-0.16066	-0.23805	0.288936	-0.0782	-0.00069
OSCP1	-0.1307	0.051891	0.025179	-0.19959	0.150099
MRPS15	-0.17154	-0.21764	0.222944	-0.05137	0.07533
CSF3R	-0.23448	-0.39251	0.498255	-0.31411	-0.18651
GRIK3	0.346291	0.479195	-0.26485	0.603086	-0.13696
ZC3H12A	0.085811	0.196727	0.369849	-0.09216	-0.18745
MEAF6	-0.34476	-0.09256	-0.19303	-0.18583	0.382536
SNIP1	0.057139	0.157747	0.086079	-0.05558	-0.17827
DNALI1	-0.06768	0.033622	0.102106	-0.23214	-0.00094
GNL2	0.072145	0.178925	0.35571	0.046325	-0.35968
RSPO1	-0.42386	-0.17414	-0.35942	-0.25576	0.394071
C1orf109	-0.02347	0.199737	-0.2129	0.149643	0.155625
CDCA8	0.150394	0.13233	0.079256	0.209519	-0.16977
EPHA10	-0.24557	-0.25815	-0.10716	-0.00598	0.314763
MANEAL	0.206656	0.311184	-0.20866	0.115319	-0.08594
YRDC	0.114405	0.006015	0.231794	0.039978	-0.13208
C1orf122	-0.39165	-0.54654	0.290114	-0.30708	0.074314
MTF1	-0.18253	-0.29762	0.093624	-0.3612	-0.03155
INPP5B	-0.00916	-0.00981	-0.16385	0.214849	-0.07644
SF3A3	-0.15408	-0.08208	0.062585	-0.00135	0.082852
FHL3	0.081933	-0.01047	0.194862	0.246016	-0.05359
POU3F1	-0.34293	-0.24852	-0.26663	-0.19216	0.275406
RRAGC	-0.24795	-0.31523	0.418033	-0.19024	0.056325
RHBDL2	-0.47336	-0.5413	0.205144	-0.33996	0.19365
AKIRIN1	-0.37632	-0.50094	0.266134	-0.25944	0.121201
NDUFS5	-0.38676	-0.17184	-0.04945	0.013188	0.431902
MACF1	-0.45529	-0.34822	0.193492	-0.20892	0.125249
BMP8A	-0.26735	-0.54272	0.358193	-0.21524	-0.05807
PABPC4	0.030993	0.173329	0.180085	0.043794	-0.08255
HEYL	0.23774	0.090552	0.116972	0.408682	-0.14353
HPCAL4	-0.22144	-0.01859	-0.2658	-0.0128	0.477603
PPIE	0.004872	0.047038	0.270521	-0.04963	-0.14803
BMP8B	0.054006	-0.01009	0.034023	-0.16321	-0.14018
TRIT1	-0.25572	0.017924	-0.00172	-0.00471	0.108248
MFSD2A	0.210832	0.175081	-0.10294	0.181969	-0.00016
CAP1	-0.233	-0.37884	0.512497	-0.21191	-0.1405
PPT1	-0.14828	-0.13404	0.269971	-0.22015	-0.15351
RLF	-0.09841	0.005244	-0.08435	-0.15507	0.134598
ZMPSTE24	-0.20552	-0.06715	0.224126	-0.13244	0.055
COL9A2	-0.32747	-0.46734	0.331557	-0.20579	0.041482
SMAP2	-0.38966	-0.45057	-0.00125	-0.29556	0.256785
ZFP69B	0.207903	0.220007	0.019484	0.084857	-0.03161
ZFP69	0.149572	0.003658	-0.07329	0.203814	0.056746
EXO5	0.114781	0.09971	-0.00693	0.141721	0.031232
ZNF684	0.06661	0.189429	0.097968	-0.26298	-0.05706
RIMS3	-0.36478	-0.11105	-0.22271	-0.04494	0.408588
NFYC	-0.11891	-0.10543	0.039201	0.116054	-0.01434
KCNQ4	-0.28976	-0.14197	0.200191	-0.29339	0.142148
CITED4	-0.38228	-0.54092	0.182141	-0.30813	0.229119
CTPS1	0.071082	0.108262	-0.02947	0.198506	-0.17067
SCMH1	0.005445	0.200727	-0.10686	0.338445	0.12516
EDN2	-0.01034	0.120912	0.168415	-0.01315	-0.06901
HIVEP3	-0.13956	-0.26347	-0.10229	-0.02967	-0.00709
FOXJ3	-0.34419	-0.19852	0.041746	0.059642	0.388471
RIMKLA	-0.2655	-0.0394	-0.32336	0.031775	0.428157
ZMYND12	-0.40013	-0.3466	0.293619	-0.27581	0.297549
PPCS	-0.22602	-0.26717	0.244866	-0.05133	0.082543
CCDC30	-0.10076	0.217743	0.017306	-0.25764	0.092744
PPIH	0.046003	0.159239	0.17433	0.043203	-0.21819
YBX1	0.062876	0.264186	-0.12112	-0.03423	-0.09942
C1orf50	-0.02586	0.092197	-0.05471	0.130824	0.014117
ERMAP	-0.25363	-0.31231	0.326566	-0.18088	-0.04037
ZNF691	0.115876	0.157352	0.271294	-0.00258	-0.11325
SLC2A1	-0.09687	0.211166	0.061129	0.009778	0.056117
FAM183A	0.078124	0.171677	0.043053	-0.12084	-0.09575
EBNA1BP2	0.023932	0.213639	0.025453	-0.04504	0.049772
TMEM125	-0.37639	-0.58794	0.355432	-0.40387	0.049641
TIE1	0.189282	0.109262	-0.25593	0.324373	-0.06448
MPL	-0.32448	-0.37806	0.068794	-0.28392	0.209287
CDC20	0.147146	0.063839	0.064578	0.2397	-0.16718
ELOVL1	-0.32186	-0.54831	0.44274	-0.35039	0.012326
MED8	-0.1221	-0.33273	0.209995	-0.04079	-0.09923
SZT2	-0.23676	-0.42765	0.307354	-0.17899	0.037787
PTPRF	-0.13175	-0.01944	0.303839	-0.18511	0.010457
KDM4A	-0.01775	0.126316	-0.18192	0.013631	0.032291
ST3GAL3	-0.09584	-0.12348	-0.17943	0.003325	0.104222
ARTN	0.019075	0.198824	-0.11503	0.075784	-0.0255
IPO13	-0.45871	-0.60033	0.335632	-0.48733	0.161156
DPH2	-0.07126	0.219008	0.037919	0.096884	-0.10563
ATP6V0B	-0.57783	-0.56944	0.387643	-0.34258	0.146724
B4GALT2	0.066993	0.163616	-0.23829	0.202779	0.112799
CCDC24	-0.0846	0.181989	-0.01886	0.047446	0.101485
SLC6A9	-0.08098	-0.09879	0.207715	-0.04205	-0.14378
KLF17	0.182124	0.170371	-0.00768	0.170994	-0.11563
DMAP1	-0.22275	-0.13062	0.089504	0.038342	0.060797
ERI3	-0.39923	-0.28101	-0.18718	-0.25353	0.511617
RNF220	-0.40512	-0.55639	0.076771	-0.29924	0.2629
TMEM53	-0.10436	-0.18078	0.337715	-0.20549	0.043152
KIF2C	0.220783	0.303608	0.00537	0.249652	-0.16385
RPS8	0.07416	0.074695	-0.03986	0.299303	-0.1388
BEST4	-0.02068	0.077377	0.114524	-0.06357	0.091724
PLK3	0.006155	-0.01999	0.270747	-0.23702	-0.21189
PTCH2	-0.01748	-0.0493	0.064948	-0.05176	-0.0986
EIF2B3	-0.1608	-0.05922	0.073427	-0.04971	0.096995
HECTD3	-0.45861	-0.50738	0.311817	-0.36986	-0.03305
UROD	-0.29207	-0.19922	0.32331	-0.29911	0.076235
ZSWIM5	0.07026	0.088355	0.020532	0.364951	-0.12087
HPDL	-0.1099	-0.09525	0.294611	0.000256	-0.03981
MUTYH	-0.00535	0.052283	0.181287	0.210609	-0.02456
TOE1	-0.18173	-0.11314	0.071301	-0.05919	-0.09404
TESK2	-0.27419	-0.44704	0.072333	-0.20394	0.256706
MMACHC	-0.25526	-0.37081	0.309615	-0.169	0.066854
PRDX1	-0.33244	-0.33585	0.37179	-0.21724	0.14292
AKR1A1	-0.14457	-0.29863	0.276619	-0.15312	-0.16821
NASP	0.200427	0.07869	0.050326	0.336709	-0.26822
CCDC17	0.113583	-0.09865	0.017792	0.221798	-0.05507
GPBP1L1	-0.16849	-0.04342	0.301779	-0.29028	-0.12194
TMEM69	0.078884	0.052622	0.138071	0.134729	-0.21605
IPP	0.048001	0.092916	0.326232	0.033321	-0.25637
MAST2	-0.08227	-0.01065	-0.17309	0.120606	0.004151
PIK3R3	-0.1213	0.160699	-0.10698	0.098416	0.118528
TSPAN1	-0.14606	-0.2567	0.223869	-0.06141	-0.22768
POMGNT1	-0.3143	-0.40509	0.363352	-0.15543	-0.10196
LURAP1	-0.10744	-0.30668	-0.10158	-0.03765	0.034555
RAD54L	0.353847	0.196494	0.01954	0.483598	-0.15623
LRRC41	0.057799	-0.03969	0.110854	0.117703	-0.25764
UQCRH	-0.20479	0.006314	-0.1995	0.131813	0.422491
NSUN4	-0.06631	-0.0005	0.317594	-0.17763	-0.17773
FAAH	-0.3527	-0.52815	0.258071	-0.27862	0.13194
DMBX1	-0.00977	0.139928	0.106767	-0.03123	-0.09341
KNCN	-0.09814	0.028046	-0.02149	0.036617	0.110431
MKNK1	-0.46765	-0.339	0.281161	-0.19531	0.058065
MOB3C	-0.22168	-0.23046	0.03199	0.155764	0.094076
ATPAF1	-0.49393	-0.3377	0.029932	-0.06043	0.272896
TEX38	-0.1859	-0.29126	-0.03637	0.062369	0.178571
EFCAB14	-0.33764	-0.31076	0.36277	-0.42686	-0.00654
CYP4B1	-0.07446	-0.23911	0.058783	-0.04245	0.053754
CYP4A11	-0.10213	0.064687	-0.09973	0.130112	0.067836
CYP4X1	-0.39237	-0.13489	-0.1835	-0.06445	0.598823
CYP4Z1	-0.09139	-0.01905	0.261266	-0.12826	-0.01192
PDZK1IP1	-0.22338	-0.12132	0.051873	-0.0061	0.02388
TAL1	-0.19459	-0.35034	-0.02991	-0.23637	-0.06836
STIL	0.0626	0.185421	0.238148	0.088933	-0.22809
CMPK1	-0.51254	-0.40026	0.308716	-0.22307	0.065818
FOXD2	0.103453	0.113082	-0.0101	-0.00501	-0.02622
TRABD2B	0.113403	-0.07882	-0.10164	0.167467	0.001239
SLC5A9	-0.06597	-0.03988	0.10552	0.090519	-0.07108
SPATA6	0.157547	0.053292	0.201183	-0.1571	-0.17186
AGBL4	-0.21035	-0.20626	-0.11786	0.04963	0.500034
BEND5	-0.04066	0.152155	-0.22047	0.09321	0.387201
ELAVL4	-0.06944	0.125849	-0.40691	0.130837	0.344798
DMRTA2	0.183283	0.189997	-0.00371	0.223538	-0.15352
FAF1	0.065473	-0.06491	-0.05321	0.148558	0.145533
CDKN2C	0.23642	0.194271	-0.15824	0.286969	-0.16653
RNF11	-0.44032	-0.27661	-0.13411	-0.14261	0.434624
TTC39A	0.081638	0.062483	0.065658	-0.05411	-0.21573
EPS15	-0.57626	-0.5409	0.083597	-0.15798	0.294556
OSBPL9	-0.00602	-0.00802	0.059895	-0.08813	-0.01468
RAB3B	-0.33819	-0.19475	-0.2394	-0.09791	0.362589
TXNDC12	-0.03285	-0.04292	0.048644	-0.0372	-0.10462
BTF3L4	0.068343	0.08178	0.0545	0.127209	0.076447
ZFYVE9	-0.18189	-0.05546	-0.13379	-0.0774	0.389501
CC2D1B	-0.39798	-0.46229	0.138466	-0.34779	0.148766
ORC1	0.334567	0.347732	-0.12782	0.151975	-0.11086
PRPF38A	-0.07577	-0.10398	-0.12847	-0.1298	0.05846
GPX7	0.416512	0.312309	-0.01486	0.229005	-0.23189
ZYG11B	-0.35082	-0.05518	-0.28576	-0.13653	0.341574
ECHDC2	-0.10822	-0.07816	0.248636	0.197185	0.006853
SCP2	-0.19968	-0.11365	0.127031	-0.07438	0.099044
PODN	0.073423	0.250561	0.207929	-0.03819	-0.2326
SLC1A7	-0.15151	-0.05063	0.302487	-0.13805	-0.05261
CPT2	0.013573	-0.15619	-0.06724	-0.03589	-0.11939
MAGOH	-0.01944	-0.05862	0.157015	0.14362	0.022031
LRP8	0.097891	0.226795	-0.3143	-0.00576	0.157809
GLIS1	-0.08638	0.125541	-0.28556	0.018878	0.091025
YIPF1	-0.01788	0.054632	0.015626	-0.09253	-0.20476
DIO1	0.061256	0.081625	-0.11693	0.294956	0.153654
HSPB11	-0.05574	-0.06496	0.019476	-0.12573	0.069537
LRRC42	0.055853	0.003347	0.021144	0.252834	0.082876
TMEM59	-0.34641	-0.42318	0.382696	-0.25879	-0.05966
TCEANC2	-0.19494	-0.06157	0.488935	-0.15312	-0.22578
CYB5RL	0.045595	0.005823	0.147024	0.187729	-0.2135
MRPL37	-0.09503	-0.01286	0.319582	0.144709	0.125718
SSBP3	-0.42178	-0.33872	-0.18074	-0.21275	0.46052
ACOT11	-0.02146	0.092752	-0.01567	-0.0524	0.246828
MROH7	-0.14114	-0.16517	0.32284	-0.19882	-0.00861
TTC4	-0.03676	0.025269	0.016923	-0.1467	-0.08369
PARS2	-0.05046	-0.02667	-0.00341	-0.0468	-0.18181
DHCR24	-0.39171	-0.46434	0.313328	-0.24229	0.019708
TMEM61	-0.18771	-0.3588	0.20351	-0.03125	0.073921
USP24	-0.00173	0.066441	-0.219	-0.18687	-0.1161
PRKAA2	-0.22054	-0.02693	-0.24713	-0.06048	0.392397
DAB1	-0.15386	0.04303	-0.09631	0.117641	0.417781
OMA1	-0.04852	-0.03346	0.267264	-0.41751	-0.14798
TACSTD2	-0.19931	-0.44412	0.18005	-0.11889	0.003381
MYSM1	-0.29277	-0.14131	0.084875	-0.19915	-0.09394
JUN	0.10528	0.175364	0.255317	0.078439	-0.15316
FGGY	-0.23822	-0.23296	0.155434	-0.20633	0.122001
HOOK1	-0.39411	-0.12772	-0.08471	-0.07217	0.365768
CYP2J2	-0.33449	-0.35417	0.209003	-0.26555	0.172037
C1orf87	-0.34139	-0.22883	0.209575	-0.29704	0.431498
NFIA	-0.04422	0.211362	-0.02076	0.094061	0.060894
TM2D1	-0.28602	-0.36054	0.080472	-0.20635	0.307167
L1TD1	-0.19715	-0.31059	-0.28411	-0.08084	0.078234
KANK4	-0.28523	-0.53771	0.298971	-0.24029	0.043583
USP1	0.00452	0.106408	-0.09248	-0.13873	-0.13222
DOCK7	0.075754	0.068894	0.056084	0.019132	-0.04067
ANGPTL3	-0.10047	0.070324	0.098405	0.1655	-0.06302
ATG4C	-0.34706	-0.47211	0.403177	-0.46442	-0.0607
FOXD3	0.116089	0.235744	-0.11892	0.110394	-0.06673
ALG6	0.242052	0.172463	-0.16236	0.224161	-0.23511
ITGB3BP	0.161052	0.253234	0.025743	0.155572	-0.22639
EFCAB7	-0.0299	-0.05177	-0.11782	-0.07232	0.23565
PGM1	0.165681	0.072116	-0.11687	0.282273	0.081683
ROR1	-0.10596	-0.07432	-0.1047	0.067935	-0.09605
CACHD1	-0.07366	0.064767	0.101264	0.103795	0.163995
RAVER2	-0.10489	-0.04911	0.173536	0.03404	0.178591
JAK1	0.062387	0.198847	-0.08352	0.038017	-0.05599
AK4	-0.12925	0.069091	-0.15715	0.042604	0.076632
DNAJC6	-0.54642	-0.54516	-0.01519	-0.36623	0.390354
LEPROT	-0.19975	0.019508	0.235926	-0.21368	-0.11609
LEPR	-0.03251	0.008015	-0.05724	-0.06924	0.053318
PDE4B	-0.03953	0.012099	0.039344	-0.06098	-0.20302
SGIP1	-0.50563	-0.48608	-0.05318	-0.10959	0.536321
TCTEX1D1	0.055167	0.104068	0.05552	-0.16738	-0.11961
WDR78	0.175913	0.165921	0.017778	-0.09151	-0.13421
MIER1	-0.23087	-0.06249	0.287566	-0.22274	0.095392
SLC35D1	-0.11218	-0.0766	0.177687	-0.08398	-0.14972
C1orf141	0.024274	-0.02687	-0.02845	-0.03481	-0.06451
IL12RB2	-0.07628	-0.02997	0.027129	-0.13318	-0.03024
SERBP1	0.088095	0.106839	0.046703	0.08767	-0.24559
GADD45A	0.233631	0.185831	-0.06295	0.249343	-0.00664
GNG12	-0.02409	0.049675	0.364351	-0.11016	-0.09608
DIRAS3	0.062601	0.364681	0.099813	-0.08854	-0.20958
WLS	-0.03319	-0.07228	0.210302	-0.0489	0.178264
RPE65	-0.01481	-0.10043	0.068156	-0.00516	0.078006
DEPDC1	0.251168	0.183596	-0.10781	0.306727	-0.11888
LRRC7	-0.44451	-0.38862	-0.10151	-0.15311	0.60777
LRRC40	0.062184	0.041076	-0.0232	-0.17518	-0.04173
SRSF11	0.026718	0.139849	0.03656	0.012335	-0.29306
ANKRD13C	-0.02682	0.02609	0.062505	0.131575	0.11482
HHLA3	-0.26366	-0.2189	0.494293	-0.29436	0.08162
CTH	0.084369	0.250967	0.223772	0.066101	0.001402
PTGER3	-0.12554	-0.04159	-0.0349	0.051405	0.167228
ZRANB2	-0.21026	-0.07182	0.055902	-0.32875	0.006158
NEGR1	-0.42542	-0.20711	-0.22574	-0.15271	0.633638
LRRIQ3	0.13207	0.201141	0.136734	0.049467	-0.13424
FPGT	-0.36545	-0.19764	0.380299	-0.34461	-0.11092
CRYZ	0.089794	0.166876	0.099022	-0.08916	-0.0955
TYW3	-0.24999	-0.20948	0.062965	-0.20513	0.295273
SLC44A5	0.339273	0.414756	-0.24448	0.12713	-0.01201
ACADM	-0.31853	-0.19372	0.089266	-0.2244	0.188168
RABGGTB	-0.33475	-0.33093	0.22194	0.041725	0.111961
MSH4	0.012187	0.060996	-0.20649	-0.05156	0.142026
ST6GALNAC3	-0.38855	-0.53613	0.319741	-0.4153	0.101436
ST6GALNAC5	-0.17202	-0.1088	-0.07353	0.174846	0.411985
PIGK	-0.38948	-0.53519	0.25302	-0.33981	0.09271
AK5	-0.57672	-0.5781	0.073328	-0.37306	0.410487
USP33	-0.3547	-0.15704	-0.04602	-0.04598	0.164665
NEXN	-0.16073	0.011122	0.446498	-0.06768	-0.23131
FUBP1	0.047012	0.212252	-0.1442	-0.19406	0.138438
DNAJB4	-0.14701	-0.14037	0.063496	-0.23928	-0.00131
GIPC2	0.051208	0.09628	0.134197	0.097578	-0.14997
PTGFR	-0.02209	-0.00412	0.173961	0.126994	0.082604
IFI44L	-0.26559	0.016564	0.200086	-0.30437	-0.13742
IFI44	-0.10628	0.181156	0.252496	-0.26912	-0.20731
TTLL7	-0.44661	-0.47009	0.118193	-0.42161	0.167357
PRKACB	-0.4165	-0.43081	-0.06069	-0.26076	0.380158
SAMD13	-0.05126	-0.10729	0.043329	-0.21473	-0.14577
DNASE2B	-0.02497	-0.19082	0.167822	-0.11921	-0.10633
RPF1	-0.0706	0.005754	0.365825	-0.03659	-0.17109
GNG5	0.124202	0.063857	0.206304	0.141279	-0.1117
CTBS	-0.22913	-0.38693	0.242241	-0.22799	-0.01683
SSX2IP	-0.42972	-0.18732	-0.1536	-0.14417	0.444546
MCOLN2	-0.08225	-0.0362	0.317661	-0.12998	-0.23559
MCOLN3	-0.2475	-0.3427	-0.13341	-0.16303	-0.07775
WDR63	0.079166	0.181132	0.069531	-0.13653	-0.10705
SYDE2	-0.24101	-0.15856	0.270995	-0.18113	-0.01775
C1orf52	-0.44964	-0.34933	-0.25432	-0.23237	0.476555
BCL10	-0.0576	0.064365	0.023522	0.024254	-0.01297
DDAH1	-0.33388	-0.16547	-0.12087	-0.16264	0.500477
ZNHIT6	-0.53641	-0.41892	0.127963	-0.47548	0.368931
COL24A1	-0.13279	0.022	-0.12803	-0.08216	0.208493
ODF2L	-0.09788	0.023413	-0.0419	-0.16321	0.057402
CLCA2	-0.18692	-0.31528	-0.11168	-0.15018	0.218117
CLCA4	-0.29853	-0.44143	0.142035	-0.34281	0.184223
SH3GLB1	0.113044	0.11635	0.272868	-0.0355	-0.21051
HS2ST1	0.256803	0.36949	0.039072	0.151808	-0.138
LMO4	-0.13771	-0.04168	-0.17956	0.083958	0.31128
PKN2	-0.03894	-0.01733	0.139697	0.088335	-0.1549
GTF2B	-0.30963	-0.16194	-0.12384	-0.15153	0.166467
RBMXL1	-0.11555	0.0255	0.046752	-0.13086	0.246199
GBP3	0.098718	0.171352	0.217813	0.086032	0.022259
GBP1	-0.03313	0.079962	0.195507	0.169239	-0.03431
GBP2	-0.01074	0.037067	0.186102	-0.04903	-0.14069
GBP7	-0.04615	0.209707	0.324897	-0.00931	-0.15166
GBP4	-0.26908	0.005621	0.128198	-0.27373	-0.13087
GBP5	-0.23698	-0.16064	0.074608	-0.16079	-0.12738
GBP6	-0.09568	0.025148	-0.04208	0.152121	0.124789
LRRC8B	-0.53698	-0.52066	0.298969	-0.28784	0.316017
LRRC8C	-0.4264	-0.3516	0.245868	-0.16669	0.267406
LRRC8D	-0.3123	-0.43046	0.41316	-0.35368	0.024074
ZNF326	-0.11184	-0.1688	0.1611	-0.18592	-0.27366
ZNF644	-0.10065	-0.18234	-0.13768	-0.14276	-0.04943
HFM1	0.023775	0.214776	-0.18881	-0.02972	-0.07382
CDC7	0.176353	0.409839	-0.15566	0.489119	-0.10883
TGFBR3	-0.33546	-0.20633	0.128347	-0.26373	0.495116
BRDT	-0.02789	0.127719	0.039174	-0.0139	0.14157
EPHX4	-0.25132	-0.19213	0.245518	0.024966	0.27584
BTBD8	-0.23239	-0.32949	-0.04898	-0.20977	0.151177
GLMN	-0.03163	0.312917	-0.0646	-0.06281	-0.10013
RPAP2	-0.19424	-0.1519	-0.04797	-0.11758	-0.08407
EVI5	-0.27183	-0.24755	0.129319	-0.48911	0.052191
RPL5	0.153815	0.141661	-0.07668	0.163935	-0.14253
MTF2	-0.09217	-0.21111	0.115103	0.007771	-0.16146
TMED5	-0.08362	-0.12082	0.213985	-0.17425	-0.14919
CCDC18	-0.06402	0.038139	0.159356	-0.2194	-0.29563
DR1	-0.1536	0.02748	0.324758	-0.14017	-0.11503
FNBP1L	-0.05723	0.139502	-0.02946	0.176183	0.092592
BCAR3	0.11158	0.296328	-0.0441	-0.06846	0.047704
DNTTIP2	-0.15888	-0.12377	0.150011	-0.06678	0.174583
GCLM	-0.1661	-0.26147	0.276423	-0.09749	0.086623
ABCA4	-0.22571	-0.04497	-0.09389	0.122521	0.004044
ARHGAP29	0.08547	0.228592	-0.09307	0.31515	-0.06454
ABCD3	0.036784	-0.01225	0.118502	0.06132	-0.0615
F3	-0.2423	-0.15825	0.140141	0.221117	0.304839
SLC44A3	-0.36097	-0.18417	0.236662	-0.10347	0.286187
CNN3	0.015843	0.088151	0.145509	0.158446	0.16138
ALG14	-0.24158	-0.14382	0.419026	-0.23274	-0.01864
RWDD3	-0.03875	-0.02064	-0.13326	0.02753	0.08283
PTBP2	-0.27105	-0.31966	-0.0364	-0.31326	0.184928
DPYD	-0.0977	-0.10446	0.118946	-0.26273	-0.23627
SNX7	0.187585	-0.05166	0.172573	0.130726	-0.1314
PALMD	-0.18384	-0.19148	0.245085	-0.0501	0.01371
FRRS1	-0.00502	-0.04707	-0.06242	-0.12601	-0.09679
AGL	-0.30436	-0.04344	0.260221	-0.23237	0.352539
SLC35A3	-0.21699	-0.15596	0.200052	-0.18505	-0.16056
SASS6	-0.16	-0.24111	0.227683	-0.02011	-0.17268
TRMT13	-0.28894	-0.30888	0.102034	-0.15044	-0.14704
LRRC39	-0.04998	-0.15009	0.134178	0.196358	0.04123
DBT	-0.32697	-0.1811	0.156257	-0.32284	0.230823
RTCA	-0.34774	-0.44786	0.416011	-0.1805	-0.03365
CDC14A	-0.36129	-0.17297	-0.04255	-0.30014	0.078411
GPR88	-0.30321	-0.20009	-0.13357	-0.18711	0.604248
VCAM1	0.126569	0.250382	0.314739	-0.12217	-0.20728
EXTL2	-0.08249	0.139208	-0.31929	0.102176	0.197417
SLC30A7	-0.025	-0.05898	0.309697	0.032871	-0.35321
DPH5	0.141677	0.216898	0.320574	0.140441	-0.25846
S1PR1	-0.38277	-0.18888	-0.12372	-0.12165	0.383894
OLFM3	-0.36393	-0.1394	-0.33687	-0.06863	0.605827
COL11A1	0.038875	0.154074	0.301149	0.009068	-0.1283
RNPC3	-0.19385	-0.09367	-0.0926	-0.07642	0.050183
AMY2B	-0.10257	0.01927	0.277241	-0.10509	-0.02397
AMY2A	-0.12542	-0.04394	-0.17175	0.056635	0.230296
PRMT6	0.130827	0.141059	-0.18491	0.040941	-0.20531
NTNG1	-0.08868	0.244767	0.089344	-0.0755	0.089947
VAV3	-0.12519	0.020995	-0.06306	-0.10248	-0.02566
SLC25A24	0.160132	0.024276	0.323533	0.025466	-0.22261
FAM102B	-0.09495	0.015657	-0.15058	0.129617	0.142843
HENMT1	-0.43712	-0.3572	0.094408	-0.19195	0.322968
PRPF38B	-0.15746	-0.0089	0.043072	-0.17696	-0.28575
FNDC7	-0.02999	0.12028	-0.0154	0.016116	0.231888
STXBP3	-0.2131	-0.13942	0.266593	-0.19381	0.024947
AKNAD1	0.05081	0.375479	-0.11582	-0.00146	-0.08427
GPSM2	0.23595	0.21808	-0.00768	0.038424	-0.20087
CLCC1	-0.12872	-0.14105	0.236922	-0.10914	-0.16707
WDR47	-0.43269	-0.16255	-0.25559	-0.08703	0.531098
TAF13	-0.2991	-0.17859	-0.13771	-0.11727	0.411908
TMEM167B	-0.12754	-0.16747	0.359	-0.16152	0.134071
C1orf194	-0.12514	0.037721	0.190446	-0.23547	-0.00108
KIAA1324	-0.43949	-0.23765	-0.09558	-0.17724	0.368768
CELSR2	-0.48476	-0.45644	0.095133	-0.29988	0.369369
PSRC1	-0.15963	-0.34856	0.608297	-0.13169	-0.20852
MYBPHL	-0.19041	-0.22857	-0.13865	-0.21548	0.241777
SORT1	-0.40429	-0.62135	0.31039	-0.43635	0.123974
PSMA5	0.068063	-0.03489	0.055686	0.23028	-0.17407
SYPL2	-0.28583	-0.27296	0.008886	-0.13539	0.121602
ATXN7L2	0.158063	0.069039	-0.06477	0.213316	-0.04219
CYB561D1	-0.03224	0.133274	0.186862	-0.03756	-0.19193
AMIGO1	-0.09316	0.176245	-0.14208	0.041063	0.138347
GPR61	-0.21473	-0.22861	-0.17324	-0.02726	0.433936
GNAI3	0.275916	0.311003	0.172327	0.194441	-0.21902
GNAT2	0.095922	-0.02759	-0.15351	0.130392	0.034206
AMPD2	-0.27125	-0.11528	-0.2552	0.05013	0.372038
GSTM4	-0.39775	-0.36827	0.151467	-0.05887	0.270456
GSTM2	0.005174	0.092782	-0.25532	0.09902	0.101214
GSTM1	-0.17824	-0.03842	0.006469	-0.05132	0.087931
GSTM5	-0.45771	-0.48557	0.127979	-0.19081	0.344514
GSTM3	-0.40605	-0.10458	0.050693	-0.20947	0.368611
CSF1	-0.21664	-0.19383	0.496849	-0.31035	-0.27769
AHCYL1	-0.18853	0.001847	0.206432	-0.20089	0.043625
STRIP1	-0.1177	-0.02747	-0.09441	0.055938	0.215263
UBL4B	0.36319	0.183905	-0.10065	0.168213	-0.11028
SLC6A17	-0.35456	-0.18725	-0.20677	0.002713	0.513406
KCNC4	-0.43373	-0.2319	-0.25391	0.012823	0.619464
RBM15	-0.10527	-0.19634	0.04445	0.024451	-0.16067
SLC16A4	0.28653	0.43392	0.127318	0.090362	-0.32999
LAMTOR5	-0.02102	0.105399	0.148117	0.046698	0.082404
PROK1	-0.08314	-0.08269	-0.08642	-0.16238	0.077433
KCNA2	-0.41043	-0.17924	-0.19751	-0.05335	0.442796
KCNA3	-0.1886	-0.10092	-0.24364	-0.14376	0.435313
CD53	-0.26719	-0.24434	0.193497	-0.16903	-0.13359
LRIF1	0.222843	0.360565	-0.22539	-0.00234	-0.13174
DRAM2	-0.16073	-0.1832	0.353335	-0.15294	-0.27116
CEPT1	-0.08258	-0.00064	0.20221	-0.2647	-0.04735
DENND2D	0.020763	-0.17461	0.078731	-0.03736	-0.03392
CHI3L2	-0.06458	-0.03561	0.196541	-0.09399	-0.01998
PIFO	0.02785	0.048969	0.152501	-0.17123	0.004582
OVGP1	-0.01942	0.004911	-0.16603	0.246013	0.075536
WDR77	0.162449	0.094311	0.181468	-0.04266	-0.06423
C1orf162	-0.09236	-0.06339	0.533175	-0.11544	-0.26802
ADORA3	-0.3831	-0.51392	0.528727	-0.37347	-0.22524
RAP1A	-0.46193	-0.59462	0.341072	-0.39521	0.018849
DDX20	0.084851	0.362169	0.00808	-0.039	-0.18138
KCND3	-0.05991	0.087692	0.004664	-0.13673	0.169403
CTTNBP2NL	0.044216	0.185093	-0.01338	0.040476	0.02459
WNT2B	0.008817	0.053857	0.083544	-0.05853	0.202229
ST7L	-0.06604	0.065919	0.327419	-0.07757	-0.11572
CAPZA1	-0.24456	-0.20208	0.395758	-0.11461	-0.10354
MOV10	0.265185	0.36175	0.295024	0.107081	-0.36771
RHOC	0.071314	0.011674	0.289341	0.12865	0.026841
PPM1J	-0.17276	-0.02008	0.302603	-0.13606	-0.09478
SLC16A1	0.376461	0.41018	0.055076	0.157683	-0.33465
LRIG2	-0.03589	0.128861	0.196385	0.105551	0.012857
MAGI3	-0.09291	0.118336	-0.05662	-0.03528	0.152549
PHTF1	0.032098	0.170392	0.049924	0.042216	-0.01051
RSBN1	0.175283	0.337146	-0.19593	0.046607	-0.09447
PTPN22	-0.19353	-0.08301	0.113805	-0.23332	-0.10679
BCL2L15	-0.19584	-0.24508	0.040188	0.047986	0.1784
AP4B1	-0.15544	-0.12676	-0.10557	0.246368	0.202394
DCLRE1B	0.129474	0.134333	-0.13491	0.324551	-0.19553
HIPK1	-0.17197	0.032775	0.31727	-0.20211	0.119479
OLFML3	-0.11107	-0.19278	0.203174	0.00602	-0.15712
SYT6	0.069952	0.113192	-0.29918	-0.07245	-0.03634
TRIM33	-0.07783	-0.00528	-0.16477	0.075555	0.072692
BCAS2	-0.155	-0.1185	-0.0041	-0.08298	0.209459
DENND2C	-0.02288	-0.05065	-0.11524	-0.10483	0.032362
NRAS	0.1936	0.034942	0.082582	0.041182	-0.22638
CSDE1	-0.35572	-0.22514	0.276466	-0.38153	-0.01384
SIKE1	-0.00078	0.08165	0.218444	0.033314	-0.02822
TSPAN2	0.114944	-0.05656	0.09642	0.140655	0.049106
NGF	0.080597	0.12557	-0.06363	-0.00369	0.20601
VANGL1	0.369342	0.328749	0.005218	0.105411	-0.28673
CASQ2	-0.1866	-0.02705	0.321998	-0.12916	-0.00484
NHLH2	-0.25328	-0.07182	0.125185	-0.05989	0.140946
SLC22A15	-0.41867	-0.52334	0.227767	-0.32231	0.216759
MAB21L3	-0.30202	-0.2901	0.296024	-0.12516	0.281324
ATP1A1	-0.03121	0.035123	-0.04274	0.021244	0.133665
CD58	-0.03915	0.076071	0.291281	-0.07721	-0.14333
IGSF3	0.364034	0.315107	-0.09933	0.353981	-0.13439
CD2	-0.23569	-0.2598	-0.066	-0.15049	-0.11576
PTGFRN	0.578356	0.460256	-0.08166	0.481075	-0.25636
CD101	0.367952	0.375062	-0.17541	0.462666	-0.04158
TTF2	-0.07225	0.016444	0.363177	-0.15418	-0.35644
TRIM45	-0.03073	-0.13268	-0.082	0.292733	-0.15007
VTCN1	0.363102	0.174102	-0.26606	0.390947	-0.13943
MAN1A2	-0.32936	-0.16112	-0.12869	-0.14754	0.270839
GDAP2	0.015381	0.084191	-0.02626	0.062425	-0.00273
WDR3	0.309793	0.425029	0.107832	0.219758	-0.24316
SPAG17	-0.03361	0.12338	0.048974	-0.19857	-0.03271
TBX15	0.450308	0.369457	-0.06286	0.320193	-0.17051
WARS2	-0.00631	0.01072	0.087019	-0.00073	0.105947
HAO2	-0.04072	-0.03062	0.182766	0.061508	0.040773
ZNF697	0.032701	0.06734	0.09595	0.1242	0.159823
PHGDH	-0.13438	-0.26578	0.105398	-0.32391	0.016771
REG4	0.01764	-0.01074	-0.11315	0.069965	-0.10632
NOTCH2	0.286274	0.331373	0.051384	0.149317	-0.16607
FCGR1B	-0.26794	-0.34079	0.292663	-0.05348	-0.11295
NBPF9	0.136994	0.236595	0.237166	-0.02185	-0.19866
PDE4DIP	-0.35924	-0.11118	0.126801	-0.335	0.130194
SEC22B	-0.2075	-0.16667	0.141079	-0.09955	-0.12849
NBPF10	0.263014	0.404122	0.092439	0.07362	-0.28683
TXNIP	0.260089	0.122951	0.106959	0.037155	-0.48326
POLR3GL	0.386926	0.391269	-0.16166	0.085241	-0.24655
ANKRD34A	-0.30632	-0.15818	-0.34052	0.075057	0.536394
LIX1L	0.278577	0.174871	-0.05756	0.053789	-0.27189
RBM8A	0.324376	0.080069	-0.04789	0.2348	-0.1287
PEX11B	0.300052	0.339801	-0.06222	0.146922	0.027227
ITGA10	0.28558	0.175485	-0.21337	0.123539	-0.1184
ANKRD35	-0.33657	-0.23421	0.199395	-0.14175	0.335729
PIAS3	0.208954	0.127843	-0.14507	0.358722	-0.06789
NUDT17	0.011765	0.115995	-0.12277	0.012386	-0.04795
POLR3C	0.037984	-0.04966	0.160118	0.122602	0.061301
RNF115	0.217072	0.352394	-0.10035	-0.03541	0.056634
CD160	-0.2806	-0.14405	0.05808	-0.35487	0.042948
PDZK1	-0.04457	-0.10619	0.255772	-0.1158	-0.15275
GPR89A	0.123521	0.117479	0.091638	-0.01498	-0.11048
PRKAB2	0.222491	0.139622	0.050027	0.2375	-0.11214
FMO5	0.042438	-0.06198	0.291315	-0.06813	-0.14205
CHD1L	0.161988	0.123544	-0.00242	-0.01882	-0.10503
BCL9	0.042002	0.188066	-0.21909	0.016951	0.371478
ACP6	-0.21346	-0.09861	0.276778	-0.08839	0.036097
GJA5	-0.03468	-0.1661	0.016353	0.19547	-0.11983
GPR89B	-0.24807	-0.23888	-0.04918	-0.10752	0.178098
NBPF14	0.104493	0.064947	-0.06118	-0.13221	-0.06744
NBPF15	-0.12558	0.069048	-0.06545	0.144791	0.152483
FCGR1A	0.020459	-0.1475	0.294053	0.013406	0.03123
BOLA1	0.464185	0.381203	0.029871	0.090967	-0.1846
SV2A	-0.15756	0.023551	-0.39932	0.100943	0.429356
SF3B4	0.393785	0.384169	-0.22312	0.248925	-0.45879
MTMR11	0.05013	-0.02195	-0.19557	-0.00022	-0.13531
OTUD7B	-0.32058	-0.49225	0.304261	-0.4267	-0.04887
VPS45	0.027678	0.062675	-0.34706	0.1131	0.188553
PLEKHO1	-0.24071	-0.10751	-0.3028	-0.07466	0.017491
ANP32E	-0.05038	0.031556	0.082378	0.12824	0.155453
CA14	-0.27336	-0.42657	0.366314	-0.41225	-0.07722
APH1A	-0.03441	-0.05641	0.106873	0.075072	-0.04113
C1orf54	-0.13815	-0.21455	0.230738	0.00994	-0.11201
MRPS21	0.199917	0.109523	-0.31843	0.261708	0.123215
PRPF3	0.131002	0.076915	-0.00303	0.261229	-0.3023
RPRD2	0.097235	0.287172	-0.11001	0.002116	0.170499
TARS2	-0.02335	0.062768	0.014516	0.165988	-0.17513
ECM1	-0.1053	-0.11958	-0.18571	-0.06687	-0.1385
ADAMTSL4	0.03017	0.049409	0.312923	-0.09701	-0.24445
MCL1	0.29802	0.168693	-0.21315	0.212506	-0.20831
ENSA	-0.3278	-0.18243	-0.32149	0.003201	0.439038
GOLPH3L	0.084334	0.014698	-0.03098	0.080804	-0.09324
HORMAD1	-0.15574	-0.16997	0.123975	-0.06845	0.30014
CTSS	-0.31111	-0.39709	0.52502	-0.25475	-0.23993
CTSK	0.34173	0.398541	0.114545	0.11302	-0.30245
ARNT	-0.2464	-0.19043	0.237422	-0.06798	-0.02362
SETDB1	0.462448	0.372209	-0.15422	0.526822	-0.30909
CERS2	-0.36337	-0.54585	0.511427	-0.4266	-0.05069
ANXA9	-0.22582	-0.3414	0.213988	-0.25663	-0.05942
BNIPL	0.04384	0.013627	0.059363	0.109765	-0.16412
C1orf56	0.043621	-0.15871	0.03567	-0.06837	-0.16072
CDC42SE1	-0.09539	-0.36529	0.297867	-0.28203	-0.05054
MLLT11	-0.08288	0.019623	-0.3871	0.13714	0.399174
GABPB2	-0.14201	-0.24579	0.021661	-0.18035	0.124694
SEMA6C	0.378972	0.387232	-0.4639	0.449842	-0.08935
TNFAIP8L2	-0.11706	-0.09101	0.363892	-0.01052	-0.11433
LYSMD1	0.375983	0.301584	-0.2864	0.286014	-0.06227
SCNM1	0.228709	0.080982	0.095846	0.13845	0.051041
TMOD4	0.231599	0.18831	-0.24811	0.059494	-0.07678
VPS72	0.374813	0.356631	-0.23795	0.320615	-0.11912
PIP5K1A	0.295042	0.389162	-0.02947	0.224748	-0.20912
PSMD4	0.255847	0.072956	-0.13901	0.068353	-0.02958
ZNF687	0.043671	-0.10947	-0.00263	0.271927	0.115062
PI4KB	0.048535	-0.05255	0.018841	-0.15408	0.072725
RFX5	0.058381	0.140947	-0.05585	0.169644	-0.18697
SELENBP1	-0.52293	-0.51392	0.235881	-0.27835	0.404852
PSMB4	0.27495	-0.0542	0.109743	0.211257	0.020076
POGZ	0.153808	0.085953	-0.26447	0.075874	-0.00687
CGN	-0.16786	-0.40437	0.091716	-0.15961	0.128682
TUFT1	-0.01174	0.20128	0.193678	0.296784	0.05494
SNX27	-0.28691	-0.27009	-0.19673	-0.24817	0.350173
CELF3	0.034355	0.124903	-0.38272	0.131986	0.339816
RIIAD1	0.187031	0.274441	-0.10171	-0.03723	0.045914
MRPL9	0.10081	-0.0208	-0.10216	0.232429	-0.06136
OAZ3	-0.15635	-0.08936	0.30877	-0.0378	-0.10238
TDRKH	0.018406	0.150669	-0.0914	0.06695	-0.09409
LINGO4	-0.02063	-0.02232	-0.08593	0.151584	-0.02438
RORC	-0.09881	0.057176	0.106362	-0.07537	0.173002
C2CD4D	-0.26045	-0.37459	0.141026	-0.28095	0.135298
THEM5	-0.05626	0.107667	-0.24266	-0.04594	0.189071
THEM4	0.08391	0.145789	0.324602	-0.0289	-0.0181
S100A10	0.100763	0.118201	0.19696	-0.01473	0.036683
S100A11	0.177758	0.128879	0.367417	0.045284	-0.23953
TCHH	-0.31019	-0.21673	0.171734	-0.17605	0.085575
LCE5A	-0.2592	-0.18925	-0.26945	-0.20257	-0.05557
LCE1E	0.32073	0.241441	-0.142	0.039747	0.103092
LCE1C	0.263221	0.302078	-0.12863	0.073726	-0.01715
SMCP	0.388271	0.28956	-0.15039	-0.01185	-0.12976
LOR	0.097925	0.118767	-0.21241	0.097546	0.177525
S100A9	0.03852	-0.114	0.165263	0.096615	-0.15891
S100A12	-0.09191	-0.11973	-0.06665	-0.08828	-0.02171
S100A8	-0.00567	-0.07321	0.103144	0.062393	-0.188
S100A6	-0.33275	-0.28831	0.18122	-0.07736	0.031831
S100A4	-0.15837	-0.15155	-0.0029	-0.12084	-0.14566
S100A3	-0.18603	-0.16113	-0.1665	0.049661	0.108462
S100A2	0.035646	0.018309	0.186949	-0.12742	-0.09076
S100A16	0.06621	-0.03269	-0.16937	0.06251	-0.15811
S100A13	-0.50107	-0.42157	0.373313	-0.27374	0.153272
S100A1	-0.46119	-0.57029	0.338516	-0.30024	0.361765
CHTOP	-0.12477	-0.08394	0.086366	-0.05962	0.087238
SNAPIN	0.024851	-0.17932	0.061926	-0.08088	0.002513
ILF2	0.543181	0.450355	-0.24716	0.422622	-0.25845
NPR1	0.341547	0.154798	-0.16837	0.319022	-0.0208
INTS3	0.174126	0.161666	-0.03024	0.28121	-0.00136
SLC27A3	0.451729	0.319353	-0.09224	0.361252	-0.21146
GATAD2B	-0.00652	-0.09039	-0.10655	-0.21205	0.005451
DENND4B	-0.25777	-0.16867	-0.04665	0.100389	0.260598
CRTC2	-0.05302	-0.04643	0.216437	-0.18423	0.013848
SLC39A1	0.157802	0.126923	0.114424	-0.00805	-0.19669
CREB3L4	0.313903	0.316521	-0.2327	0.46936	-0.16113
JTB	0.240286	0.110301	0.001685	0.195487	-0.11814
RAB13	0.136246	0.324563	0.171874	-0.10999	-0.24167
RPS27	0.131921	-0.03581	-0.07872	0.295212	-0.12161
NUP210L	-0.18158	-0.165	-0.0251	-0.13533	-0.15008
TPM3	-0.14575	-0.15296	0.17939	-0.14246	-0.08726
C1orf43	-0.18035	-0.39262	-0.03795	0.025613	0.129572
UBAP2L	0.061693	0.317365	0.083649	0.019566	-0.13233
HAX1	-0.22607	-0.30493	-0.03287	-0.08736	0.222959
ATP8B2	0.103712	0.149603	0.118918	0.037477	-0.13015
IL6R	-0.36105	-0.33013	0.333382	-0.32186	-0.14862
SHE	-0.41306	-0.30587	-0.21205	-0.11917	0.260462
TDRD10	-0.362	-0.31528	0.168553	-0.17463	0.031477
UBE2Q1	0.005975	0.121609	-0.1446	0.159952	0.05528
CHRNB2	-0.06938	0.096963	-0.42122	0.16814	0.395569
ADAR	-0.06389	-0.02075	0.068346	0.059152	0.025354
KCNN3	-0.01644	0.082683	-0.13533	-0.12596	0.018008
PMVK	-0.14047	-0.0948	0.13459	0.073414	0.090351
PBXIP1	-0.20455	-0.04298	0.161568	-0.3092	-0.02617
PYGO2	-0.12537	-0.24639	0.208027	-0.09203	0.268193
SHC1	-0.00359	-0.00432	0.001795	0.043538	-0.22627
CKS1B	0.275988	0.25992	0.012424	0.011422	-0.03809
FLAD1	0.145043	0.076185	0.085517	0.134939	-0.20433
ZBTB7B	-0.31963	-0.2678	0.264944	-0.12483	0.184298
DCST2	0.113487	0.228024	0.269291	-0.14245	-0.24472
ADAM15	0.008037	-0.20158	-0.02331	0.080667	0.262688
EFNA4	0.105734	0.380133	-0.04192	-0.12905	-0.20449
EFNA3	-0.29246	-0.05739	-0.35918	0.081851	0.496566
EFNA1	-0.25855	-0.31827	0.346486	-0.37709	-0.01563
SLC50A1	0.069715	0.168023	0.35695	0.086508	-0.22929
DPM3	-0.0835	0.178286	-0.18089	-0.0594	-0.15399
KRTCAP2	0.123996	0.149864	-0.11985	-0.03249	-0.24472
TRIM46	-0.18633	-0.23284	0.147477	0.04258	0.032017
MUC1	-0.02601	0.121688	0.045006	0.009699	-0.0318
THBS3	-0.1564	0.080125	0.140301	-0.0918	-0.05529
MTX1	0.155388	0.28151	0.17123	0.133885	-0.06297
GBA	0.067897	0.059806	-0.10311	-0.28697	-0.21093
FAM189B	0.136077	0.258762	-0.04842	-0.02697	-0.07725
SCAMP3	0.12949	-0.06624	0.101997	-0.03918	-0.17395
CLK2	0.324464	0.299652	0.205792	0.438921	-0.38662
HCN3	0.095469	0.180807	-0.19983	0.166197	0.074333
PKLR	-0.02048	0.062113	-0.20776	0.080225	0.059119
FDPS	0.127851	0.104455	-0.08128	0.042587	0.136475
RUSC1	-0.13726	0.113303	-0.14874	0.219319	0.30488
ASH1L	-0.10234	0.026888	-0.18258	-0.29302	0.147022
MSTO1	-0.13226	-0.06885	-0.14779	0.144612	0.202844
YY1AP1	0.133012	0.130841	0.069251	0.351499	-0.16183
DAP3	0.100805	0.189993	0.180385	0.176321	-0.1072
GON4L	0.266144	0.408958	-0.06495	0.025985	-0.35167
SYT11	-0.14709	-0.24077	-0.06741	-0.31066	0.2116
RIT1	0.404302	0.238548	-0.0132	0.085125	-0.2966
ARHGEF2	-0.37633	-0.61211	0.176896	-0.34661	-0.0495
SSR2	0.448808	0.270862	-0.18663	0.405629	-0.37447
UBQLN4	-0.0424	-0.05181	0.152059	0.078378	-0.06804
LAMTOR2	0.210485	0.188377	-0.01451	0.083437	-0.02229
RAB25	-0.01876	-0.27366	-0.13388	-0.09538	0.04394
MEX3A	0.654761	0.675945	-0.334	0.383002	-0.29751
LMNA	-0.09171	-0.17821	0.354738	-0.12498	-0.11935
SEMA4A	-0.38285	-0.10788	-0.33835	-0.0675	0.373698
SLC25A44	0.050198	0.204014	-0.18922	-0.11627	0.055637
PMF1	0.102099	0.225779	0.056603	-0.21496	-0.26888
PAQR6	-0.32004	-0.46899	0.39278	-0.30736	-0.05351
SMG5	-0.14494	-0.13545	-0.02123	-0.08587	-0.06829
TMEM79	-0.09905	0.103068	0.037828	-0.01789	-0.12966
CCT3	0.522726	0.497683	-0.0383	0.411406	-0.44363
TSACC	-0.0769	-0.22397	0.137523	-0.19008	-0.12752
RHBG	-0.13562	-0.07446	-0.12596	0.106797	0.152893
C1orf61	0.210658	0.3171	-0.30236	0.115198	0.000663
MEF2D	-0.29829	-0.16637	-0.16798	0.028221	0.400857
IQGAP3	0.365708	0.27536	-0.15988	0.450424	-0.23193
GPATCH4	0.113387	0.073098	0.01608	0.078684	-0.24423
HAPLN2	-0.29528	-0.52813	0.331408	-0.30246	-0.11286
BCAN	0.526833	0.50061	-0.31148	0.407086	-0.24211
NES	0.609793	0.487932	-0.20489	0.220858	-0.40097
CRABP2	0.046091	0.084984	0.206488	0.052239	-0.06447
ISG20L2	0.274058	0.051116	-0.04906	0.153583	-0.29869
RRNAD1	0.093152	0.011776	0.00017	-0.13261	-0.0813
MRPL24	0.150689	0.287679	-0.079	0.114651	-0.18946
HDGF	-0.07708	0.128061	0.12677	0.085837	-0.16547
PRCC	0.290211	0.005363	-0.0172	0.185249	-0.11194
SH2D2A	-0.01502	0.034029	0.256026	0.005058	-0.17818
PEAR1	-0.00394	-0.04142	0.182742	0.295911	0.008805
LRRC71	-0.00674	0.043236	0.005578	-0.15174	-0.05773
ARHGEF11	-0.00167	0.144564	-0.27253	0.032746	-0.09456
ETV3L	-0.04841	0.152447	0.149633	-0.08754	-0.02709
ETV3	-0.23039	-0.11137	-0.13264	-0.05393	0.320297
CD5L	0.049786	0.131706	-0.0971	-0.03472	-0.06721
CD1D	-0.02975	0.031228	0.301809	-0.10042	-0.16963
CD1A	0.080671	0.087723	0.237313	0.043235	-0.10824
CD1C	0.25674	0.087242	0.030057	0.053307	-0.15904
MNDA	-0.28244	-0.33813	0.133231	-0.16005	-0.19967
PYHIN1	0.188149	0.073955	0.064075	-0.01559	-0.10764
IFI16	0.14585	0.217976	0.148609	-0.0002	-0.29602
AIM2	-0.00855	0.244176	-0.15456	0.247456	0.1248
CADM3	-0.10909	0.162822	-0.03007	-0.1795	0.362953
FCER1A	0.057316	0.140119	0.227569	0.030014	-0.17807
DUSP23	-0.17674	-0.2206	0.34734	-0.18785	0.092201
FCRL6	-0.31624	-0.40921	0.049558	-0.15318	0.210536
SLAMF8	-0.149	-0.22515	0.220782	-0.15659	-0.22423
TAGLN2	0.101458	0.014849	0.291445	0.033474	-0.08582
IGSF9	-0.06394	-0.06821	-0.11095	-0.10171	0.156138
SLAMF9	0.029691	0.208213	0.131431	-0.17564	-0.18205
PIGM	-0.03497	-0.15159	0.326862	-0.27946	-0.3064
KCNJ10	-0.13017	-0.19669	0.090446	-0.2828	0.110006
KCNJ9	-0.16759	0.077887	-0.09247	-0.16702	0.136752
IGSF8	-0.44337	-0.64848	0.301103	-0.4153	0.19357
ATP1A2	-0.27188	-0.13226	-0.15163	-0.17591	0.320618
ATP1A4	-0.0799	-0.05305	-0.18957	-0.07766	0.092239
CASQ1	-0.11014	0.050855	-0.34371	0.133837	0.102999
PEA15	0.109436	0.101265	-0.08863	-0.07547	0.105499
DCAF8	0.134093	0.060532	0.169922	0.014239	-0.26584
PEX19	-0.09756	-0.20075	0.157052	-0.14867	0.21024
COPA	-0.1213	-0.31716	0.24413	-0.30046	-0.18572
NCSTN	0.400224	0.310586	0.146623	0.085932	-0.28005
NHLH1	-0.11559	0.156627	0.094835	-0.06672	-0.10817
VANGL2	0.480161	0.477704	-0.15677	0.131105	-0.18066
SLAMF6	-0.29294	-0.37222	-0.0342	-0.20119	-0.0157
CD84	-0.28104	-0.53026	0.451798	-0.29271	-0.17864
SLAMF1	-0.14102	-0.19083	0.053114	0.074115	0.158348
CD48	-0.19664	-0.24173	0.210624	-0.15807	-0.11994
SLAMF7	-0.24443	-0.25567	0.175021	-0.08672	0.095805
LY9	-0.23133	-0.21443	-0.15344	-0.14592	-0.08182
CD244	-0.17093	-0.17918	0.009723	-0.16705	0.089489
F11R	-0.10081	-0.02825	0.404237	-0.2153	-0.24207
TSTD1	-0.03774	0.04383	0.078639	0.071311	0.018031
USF1	0.013431	0.045935	-0.07416	0.088439	0.203447
ARHGAP30	-0.12313	-0.23504	0.361712	-0.14932	-0.3009
KLHDC9	-0.18281	-0.14743	-0.08771	-0.20257	0.384066
PFDN2	-0.32443	-0.31528	-0.10244	-0.09666	0.309174
NIT1	0.111374	0.02662	0.272351	0.121055	-0.04664
DEDD	0.272706	0.084256	-0.00203	0.191412	-0.23568
UFC1	-0.02426	0.089466	-0.17812	-0.01304	0.160913
USP21	0.192119	0.435773	-0.30105	0.196267	-0.14614
PPOX	0.09225	0.024684	-0.13589	0.048084	-0.08222
B4GALT3	0.310224	0.38727	0.168129	0.292761	-0.1516
ADAMTS4	-0.3829	-0.61658	0.404465	-0.43428	0.082814
NDUFS2	0.108184	-0.02503	-0.14728	0.209793	0.06323
FCER1G	-0.17844	-0.23154	0.257715	-0.06477	-0.21618
TOMM40L	-0.02952	0.083126	-0.02151	-0.0329	-0.0406
PCP4L1	-0.32866	-0.08571	-0.21532	-0.08428	0.325457
SDHC	0.204255	0.258809	-0.26315	-0.0926	0.107966
FCGR2A	-0.20385	-0.37287	0.410343	-0.18901	-0.20657
HSPA6	0.292492	0.25138	0.089097	0.145115	-0.12432
FCGR3A	-0.23257	-0.29391	0.224079	0.006601	-0.2367
FCGR3B	0.168738	-0.06014	-0.14583	0.003908	-0.20418
FCGR2B	0.049741	-0.0892	0.442306	-0.08793	-0.23244
FCRLA	-0.10302	-0.01666	0.213016	-0.21626	0.021139
FCRLB	0.200982	0.340011	-0.20608	0.188499	0.112525
DUSP12	0.366507	0.366767	-0.07955	0.444281	-0.08522
ATF6	0.121658	0.142711	-0.00749	-0.23144	-0.34266
OLFML2B	0.125372	0.047742	0.243759	0.122276	-0.2168
NOS1AP	-0.1541	0.086832	-0.34933	0.031005	0.499895
C1orf226	0.269787	0.228254	-0.12465	0.202794	-0.05011
SH2D1B	-0.12103	-0.14747	-0.12796	0.117335	0.284925
UHMK1	-0.44333	-0.38934	0.126767	-0.1301	0.298058
UAP1	0.141236	0.222912	0.038023	0.185654	-0.02064
DDR2	-0.02234	0.010965	0.046689	-0.05904	-0.13851
HSD17B7	0.04097	0.293406	0.053374	-0.05365	0.02545
RGS4	-0.32425	-0.10078	-0.29252	-0.09112	0.491728
RGS5	0.165149	0.059653	-0.30817	0.252538	0.195891
NUF2	0.495681	0.378984	-0.0901	0.229029	-0.27078
PBX1	0.211175	0.407853	-0.2671	0.196756	0.106784
RXRG	-0.31357	-0.29811	0.080095	-0.27584	0.39342
LRRC52	0.462584	0.327712	-0.23913	0.223713	-0.10852
MGST3	-0.24721	-0.45472	0.102091	-0.14206	0.312127
ALDH9A1	0.189037	0.053829	0.182423	-0.14254	-0.04107
TMCO1	0.546387	0.448525	-0.17981	0.197539	-0.37207
UCK2	0.236074	0.202038	-0.31692	0.146299	-0.2314
FAM78B	0.220795	-0.01245	-0.13789	0.10222	-0.07688
POGK	-0.11718	-0.3532	0.055983	-0.19747	-0.05273
TADA1	0.034226	-0.01895	-0.23709	-0.02438	0.214315
ILDR2	0.520888	0.410237	-0.21943	0.412895	-0.14188
MAEL	0.051435	0.108986	-0.14509	-0.01918	0.240137
GPA33	-0.06898	-0.11993	-0.02175	0.10125	-0.10416
DUSP27	-0.03133	-0.00593	-0.1599	0.087153	-0.15657
POU2F1	0.294832	0.339899	-0.04415	0.209668	-0.23742
CD247	-0.01247	-0.01942	0.233558	0.015051	-0.10051
CREG1	-0.41487	-0.58509	0.424086	-0.33302	-0.07834
RCSD1	-0.32082	-0.42257	0.16762	-0.06948	-0.16065
MPZL1	0.273346	0.182145	0.100947	0.408763	-0.26755
ADCY10	0.179818	0.196407	-0.02414	0.342283	-0.17074
MPC2	-0.05551	0.074983	-0.07208	0.190499	0.221928
DCAF6	-0.05463	-0.05186	-0.41638	-0.01646	0.337581
GPR161	0.475593	0.53586	-0.25727	0.088688	-0.24102
TIPRL	0.322337	0.449401	-0.3885	0.268547	0.012271
SFT2D2	-0.23424	-0.35968	-0.09396	-0.07669	-0.10253
TBX19	0.061015	-0.16267	0.126077	0.060063	-0.24223
XCL2	-0.19619	-0.30457	-0.0673	-0.06769	-0.17872
XCL1	-0.01078	0.072334	0.240299	0.040921	-0.18382
DPT	0.002284	0.039407	0.224845	-0.00168	-0.08839
ATP1B1	-0.5503	-0.54882	-0.00639	-0.34228	0.545756
NME7	0.407983	0.294167	-0.14414	0.223407	0.124903
BLZF1	0.098344	0.105463	0.051673	-0.08574	-0.07942
SLC19A2	0.144725	0.111605	0.186872	0.064456	-0.34865
F5	0.113098	0.151771	-0.00748	-0.19103	-0.12277
SELP	-0.20115	-0.12847	0.199216	-0.10636	0.323816
SELL	0.243763	0.293036	-0.0582	-0.10067	-0.17221
SELE	-0.15687	-0.11439	0.179492	-0.07836	0.295523
METTL18	0.232698	0.099096	-0.15364	0.304152	-0.08604
C1orf112	0.033064	0.110939	0.098148	0.226212	0.173287
SCYL3	-0.04171	-0.22458	-0.01938	0.158715	-0.14121
KIFAP3	-0.07474	-0.05774	-0.29938	-0.03937	0.318985
GORAB	-0.18237	-0.00341	0.106403	-0.08586	-0.09881
PRRX1	0.182026	0.181032	0.156938	0.316933	-0.15746
MROH9	0.089101	0.132572	0.193788	-0.12618	-0.14296
FMO3	0.283987	0.23465	0.035362	0.112405	-0.07272
FMO2	-0.12233	-0.2244	0.177935	-0.09096	-0.02412
FMO1	0.049649	0.067536	0.228531	0.05494	-0.0896
FMO4	-0.17658	-0.33219	0.553503	-0.37894	-0.1072
PRRC2C	0.095734	0.169528	-0.04311	-0.03799	-0.27805
VAMP4	-0.22253	-0.06761	-0.3659	-0.05806	0.246887
DNM3	-0.42722	-0.48679	0.112994	-0.34322	0.2075
C1orf105	-0.09108	-0.21697	0.16595	-0.08952	-0.04918
PIGC	0.231677	0.317419	0.011497	0.196297	-0.22243
SUCO	0.514513	0.356001	-0.13072	0.147896	-0.2709
FASLG	-0.17071	-0.15676	-0.03157	-0.11137	-0.15644
TNFSF4	0.034321	0.056531	-0.04716	-0.07787	-0.14165
PRDX6	-0.31571	-0.42819	0.485984	-0.35577	0.137711
SLC9C2	-0.05141	0.16769	-0.04731	-0.14362	-0.09413
ANKRD45	-0.18211	0.061824	0.191412	-0.33636	-0.00431
KLHL20	0.208661	0.354922	-0.15513	0.098978	-0.316
CENPL	0.491187	0.437363	-0.14329	0.170287	-0.16802
DARS2	0.269133	0.237341	0.254781	-0.00085	-0.46059
ZBTB37	0.05358	0.211137	0.02427	-0.04895	-0.07404
SERPINC1	-0.17856	0.043819	-0.01871	-0.01457	0.021944
RC3H1	0.093711	0.248402	-0.01244	-0.07871	-0.09218
RABGAP1L	-0.18737	-0.03698	-0.2334	-0.04479	0.318105
CACYBP	-0.11642	-0.11765	-0.13968	-0.07227	0.38392
MRPS14	0.369095	0.301444	-0.19645	0.03424	-0.25667
TNN	0.315957	0.380666	0.082151	-0.00481	-0.23964
KIAA0040	0.253415	0.292232	0.013114	0.093949	-0.2583
TNR	0.198039	0.367266	-0.26477	0.127152	0.048279
PAPPA2	0.316713	0.181926	-0.08676	0.062841	-0.09495
ASTN1	0.257492	0.352371	-0.39768	0.326983	0.26178
SEC16B	-0.07819	-0.27201	-0.22831	-0.06618	0.15176
RASAL2	-0.14718	0.008217	-0.15074	-0.03425	0.311678
RALGPS2	0.256212	0.269475	-0.11747	-0.11024	-0.17813
ANGPTL1	0.352583	0.382991	0.072601	0.132139	-0.24214
FAM20B	-0.26833	-0.12635	0.019138	-0.07163	0.301829
TOR3A	0.323145	0.079252	0.064365	0.262874	-0.29242
ABL2	0.187904	0.344499	0.152188	-0.12064	-0.30767
SOAT1	0.036858	-0.1508	0.398601	-0.15643	-0.26548
AXDND1	-0.13102	-0.05509	-0.02259	-0.13118	-0.10372
TDRD5	-0.1664	-0.0447	-0.22876	-0.02438	0.156696
FAM163A	-0.1785	-0.11813	-0.20427	0.397116	0.342479
TOR1AIP2	0.141531	0.149558	-0.16217	-0.06568	-0.2479
TOR1AIP1	0.171727	0.398072	-0.07271	0.048116	-0.07243
CEP350	-0.07943	-0.19508	-0.1247	-0.30858	-0.169
QSOX1	0.44812	0.311887	0.080507	0.110907	-0.35444
ACBD6	0.400038	0.288235	-0.11645	0.33502	-0.03049
XPR1	0.078797	0.212856	-0.12486	0.170174	0.056141
KIAA1614	-0.02598	-0.05216	-0.16877	0.092595	-0.08009
STX6	-0.01655	-0.04701	-0.10101	0.070128	0.071681
MR1	-0.25741	-0.27751	0.291038	-0.26537	-0.12349
IER5	0.159521	0.124516	-0.25366	0.253911	-0.13568
CACNA1E	-0.33583	-0.15569	-0.19664	-0.03604	0.537219
ZNF648	0.071207	0.200414	0.04263	-0.019	-0.11387
GLUL	-0.0338	-0.00079	-0.15592	-0.28354	0.170761
TEDDM1	-0.0053	0.141959	-0.02573	0.197485	0.025367
RNASEL	0.26284	0.392881	0.071077	-0.0673	-0.29639
RGS16	0.249212	0.2996	0.060848	0.283439	-0.24037
NPL	-0.22932	-0.4274	0.619844	-0.2365	-0.31587
DHX9	0.503679	0.453032	-0.22163	0.251713	-0.28691
LAMC1	0.381804	0.309386	-0.08929	0.245903	-0.19093
LAMC2	0.067203	0.137605	-0.09545	0.421881	0.03951
NMNAT2	-0.23633	0.004026	-0.33107	0.002982	0.515976
SMG7	0.096438	0.286867	-0.09905	-0.03219	0.034395
NCF2	-0.17678	-0.38385	0.464315	-0.32782	-0.15215
ARPC5	-0.15839	-0.3046	0.393566	-0.10328	-0.2209
RGL1	-0.42072	-0.42548	0.109762	-0.44669	0.355923
APOBEC4	-0.0293	0.049005	-0.01835	-0.15759	-0.08928
TSEN15	-0.01502	0.034709	0.0095	-0.08559	-0.09308
C1orf21	-0.07568	0.156641	-0.38715	0.081762	0.373182
EDEM3	0.335476	0.305555	-0.33806	0.213922	-0.1899
RNF2	0.350546	0.304216	-0.28736	0.236331	-0.11463
TRMT1L	0.05656	0.058099	0.060543	-0.11912	-0.061
SWT1	-0.01806	0.007957	-0.02568	0.003457	-0.03102
IVNS1ABP	0.329635	0.125683	0.067482	0.366751	-0.18263
HMCN1	0.310428	0.219402	-0.14964	0.523562	-0.1309
PRG4	0.086997	0.131315	0.205697	0.03174	-0.01458
TPR	0.219114	0.358679	-0.04307	-0.07108	-0.30474
PDC	-0.1051	-0.09982	-0.15337	-0.05246	-0.13124
PTGS2	-0.05117	0.041451	0.161094	-0.22389	0.001555
PLA2G4A	0.343722	0.301637	0.169384	0.244224	-0.22754
RGS18	-0.01661	-0.01389	0.39211	-0.08435	-0.00586
RGS1	-0.05323	0.009323	0.290742	-0.10633	-0.18528
RGS2	0.01669	0.243371	0.039045	0.070411	-0.25869
UCHL5	-0.08698	0.016221	-0.25253	0.002075	0.154139
GLRX2	-0.16975	-0.13058	0.218588	-0.2038	0.046103
CDC73	0.169771	0.297054	0.085768	-0.17967	-0.27885
B3GALT2	-0.38521	-0.20869	-0.15757	-0.28774	0.36295
KCNT2	0.188925	0.34598	0.1602	0.150596	-0.04728
CFH	-0.10864	0.05475	0.052427	-0.07109	0.004421
ASPM	0.438429	0.350722	-0.17298	0.407048	-0.32458
ZBTB41	-0.2913	-0.11921	-0.20604	-0.07392	0.286917
CRB1	0.272631	0.306935	-0.23824	0.314338	-0.1147
DENND1B	0.210556	0.410679	-0.21635	0.041945	-0.17984
C1orf53	-0.09129	-0.13198	-0.0077	-0.1517	-0.0126
LHX9	-0.17717	-0.02913	-0.08064	0.082136	0.09319
NEK7	-0.43438	-0.32354	0.193985	-0.32387	0.175769
PTPRC	-0.06247	-0.13751	0.189173	-0.09114	-0.3157
NR5A2	0.27779	0.186774	-0.01074	0.419839	-0.13695
ZNF281	-0.02811	-0.22201	0.126902	-0.17495	-0.09557
KIF14	0.335787	0.399794	-0.18783	0.414189	-0.16382
DDX59	0.30429	0.419875	0.028722	0.060894	-0.22363
CAMSAP2	0.082605	0.274506	-0.27243	0.018741	0.082496
KIF21B	0.053923	0.164246	-0.43486	0.390565	0.123359
CACNA1S	-0.01384	-0.03097	0.065891	-0.08685	-0.01165
TMEM9	0.283163	0.339644	-0.01125	0.202368	-0.10737
IGFN1	0.261395	0.130481	-0.1197	0.409804	-0.09551
PKP1	-0.05033	-0.14975	-0.20564	0.005331	0.072989
TNNT2	-0.38788	-0.20623	-0.34437	-0.10031	0.630743
PHLDA3	-0.23358	-0.4109	0.414865	-0.27985	0.140724
CSRP1	-0.51611	-0.65613	0.294838	-0.43296	0.304954
NAV1	0.412316	0.299863	-0.23625	0.118791	-0.15904
IPO9	0.406929	0.540127	-0.22109	0.352843	-0.19647
SHISA4	-0.29082	-0.33766	-0.02599	-0.13877	0.052546
LMOD1	-0.36823	-0.45008	0.258169	-0.1095	0.313369
TIMM17A	-0.04066	0.050941	0.208815	-0.02565	0.109382
RNPEP	0.015798	0.094139	0.43651	7.16e-05	-0.3354
ELF3	-0.01551	0.023991	0.213233	-0.15754	-0.20905
GPR37L1	-0.20912	-0.06208	0.01111	-0.1142	0.164204
ARL8A	-0.17295	-0.23546	0.162366	-0.35726	0.075077
PTPN7	0.053643	0.090156	0.048672	0.184557	-0.01269
LGR6	-0.01174	-0.01919	0.022891	0.04625	0.237974
UBE2T	0.245518	0.273722	-0.22689	0.55407	0.051977
PPP1R12B	-0.31967	-0.25664	0.202493	-0.33484	0.167368
SYT2	-0.26504	0.00437	-0.23904	-0.03306	0.33003
KDM5B	0.436859	0.459702	-0.42353	0.243209	-0.15243
RABIF	0.004093	-0.08639	-0.14401	-0.16219	0.082196
KLHL12	-0.0835	0.08425	-0.10898	-0.02855	0.151745
ADIPOR1	-0.17767	-0.28089	0.213473	-0.10374	0.020645
CYB5R1	0.053072	-0.02142	-0.10964	0.121235	-0.06861
TMEM183A	-0.1409	0.082754	-0.14401	-0.10007	0.176625
PPFIA4	-0.26978	-0.02187	-0.26207	0.048715	0.399336
ADORA1	-0.21675	-0.30319	0.086084	-0.34151	0.060047
MYBPH	-0.01368	0.22451	0.041705	-0.12267	-0.14707
CHI3L1	-0.04008	0.138469	0.017541	-0.06183	-0.07199
CHIT1	-0.02374	-0.18587	0.143388	-0.10704	-0.09557
BTG2	0.152989	0.180865	0.014319	-0.05957	-0.19639
FMOD	0.072062	0.211308	0.039896	0.257576	-0.22522
PRELP	-0.11153	-0.14057	0.048432	-0.19222	0.10265
ATP2B4	0.183746	0.287304	-0.13691	-0.02521	0.068215
LAX1	-0.21123	-0.22671	-0.01212	-0.17084	-0.06979
ZC3H11A	0.072188	0.053708	-0.19919	-0.03874	-0.11785
ZBED6	-0.05574	-0.12865	-0.0302	-0.11918	-0.07484
SNRPE	0.499221	0.330375	-0.25987	0.446002	-0.18727
SOX13	0.469091	0.362796	-0.199	0.27512	-0.22022
ETNK2	0.073459	0.220477	-0.0013	0.162777	0.147878
GOLT1A	-0.12013	0.015666	-0.19876	0.145593	0.061032
PLEKHA6	-0.34682	-0.20856	-0.2171	-0.00267	0.361617
PPP1R15B	0.267576	0.289826	-0.13423	0.209543	-0.29996
PIK3C2B	-0.33041	-0.49757	0.233038	-0.37084	0.128836
MDM4	0.157302	0.021457	-0.10511	0.22615	-0.08946
LRRN2	0.123023	0.258812	-0.19662	0.200716	0.204543
NFASC	-0.3907	-0.56291	0.265216	-0.43586	0.188311
CNTN2	-0.38526	-0.60214	0.393	-0.41047	0.016839
TMEM81	-0.00137	-0.18905	0.039073	-0.05844	-0.05564
RBBP5	-0.11879	-0.23702	0.023339	-0.11174	-0.07686
DSTYK	-0.35998	-0.34827	-0.10691	-0.32711	0.370881
TMCC2	-0.5044	-0.52211	0.096891	-0.39876	0.246062
NUAK2	-0.22019	-0.25621	0.307349	-0.4023	0.048633
KLHDC8A	0.343869	0.261983	-0.07081	0.404727	-0.24077
LEMD1	0.492911	0.316495	-0.30938	0.496204	-0.15435
CDK18	-0.35354	-0.62668	0.38398	-0.38462	0.015241
ELK4	0.124484	-0.02872	-0.17128	0.246722	-0.22333
SLC45A3	-0.36057	-0.59724	0.403801	-0.4252	-0.00253
NUCKS1	-0.10483	-0.03478	-0.10459	-0.32018	-0.06891
SLC41A1	-0.14964	0.021759	-0.13732	-0.24413	0.108583
PM20D1	-0.32738	-0.23353	0.357735	-0.31708	0.122108
SLC26A9	-0.30595	-0.33429	0.142354	-0.25353	-0.01036
SRGAP2	0.244748	0.004646	-0.1339	0.109704	-0.20658
IKBKE	0.127	0.070187	0.030458	0.142191	-0.17372
RASSF5	-0.19729	-0.00801	0.142929	-0.13273	-0.02855
EIF2D	0.121619	0.031274	0.017785	0.041719	-0.21403
DYRK3	-0.10717	0.018673	0.024202	-0.06275	-0.02529
MAPKAPK2	0.05058	-0.16799	0.071999	0.033747	-0.09461
IL10	0.130454	0.079412	0.106031	-0.04106	-0.12511
PIGR	-0.27143	-0.25263	-0.19891	-0.15386	-0.02044
FCAMR	0.148784	0.374101	-0.07363	-0.02894	-0.19145
YOD1	0.004828	-0.02584	-0.01759	-0.11088	-0.05261
PFKFB2	-0.16625	-0.00842	0.109037	-0.16761	0.080428
C4BPA	-0.02941	0.190226	0.152137	-0.07224	-0.1022
CD55	-0.33234	-0.54287	0.018984	-0.27707	-0.0678
CR1	-0.07655	-0.21676	0.379434	-0.16278	-0.19676
CR1L	0.215437	0.109392	-0.07799	-0.0896	-0.15775
CD46	0.078098	-0.04692	0.159351	0.055589	-0.22366
CD34	-0.13858	-0.11849	-0.0979	-0.00394	-0.05736
PLXNA2	-0.15491	0.09912	-0.00825	0.104231	0.123994
CAMK1G	0.124519	0.207089	-0.42977	0.020121	0.294484
LAMB3	0.091808	0.040266	-0.29068	-0.12044	-0.09478
G0S2	0.133715	0.158932	0.147246	0.158463	-0.10559
HSD11B1	-0.09012	-0.00706	-0.12319	-0.11451	0.049468
TRAF3IP3	-0.21231	-0.07519	0.417391	-0.01888	0.149349
C1orf74	-0.0245	-0.08247	-0.15567	-0.14412	0.188221
IRF6	-0.10422	-0.02673	0.052215	-0.07852	0.05542
SYT14	0.045299	0.126492	-0.09464	-0.27739	0.060069
SERTAD4	0.043903	0.147211	0.185516	-0.18008	-0.15389
HHAT	0.100515	0.35599	-0.07386	0.082056	0.000917
KCNH1	-0.10526	-0.00231	-0.31242	0.274928	0.326992
RCOR3	0.078332	-0.0248	0.064657	-0.00324	-0.09053
TRAF5	0.215829	0.340528	0.171143	0.057632	-0.20324
SLC30A1	-0.19833	-0.16165	0.063975	-0.24189	-0.03507
NEK2	0.146698	0.080597	-0.16886	0.207044	-0.11229
LPGAT1	-0.53363	-0.51395	0.17901	-0.48404	0.275836
INTS7	0.396112	0.159936	-0.10543	0.441943	-0.15808
DTL	0.162402	0.230256	-0.16436	0.111702	-0.10288
PPP2R5A	-0.00366	-0.05268	-0.01579	-0.29259	0.077264
NENF	-0.36465	-0.56877	0.351879	-0.35133	-0.01761
ATF3	0.108085	0.034857	0.222975	-0.1654	-0.01158
BATF3	0.240021	0.272037	0.039088	0.123059	-0.22157
NSL1	0.140674	0.071312	0.224817	-0.04063	-0.29901
TATDN3	-0.18686	-0.12212	-0.08158	-0.21532	0.052957
FLVCR1	-0.0606	0.101652	-0.28432	-0.03221	-0.0513
VASH2	0.440466	0.388776	-0.1584	0.256394	-0.04658
ANGEL2	0.135977	0.190206	-0.27759	0.199351	-0.15705
RPS6KC1	-0.24808	-0.14927	-0.08338	-0.1205	0.209077
PROX1	-0.22381	-0.3711	0.006743	-0.44293	0.066318
SMYD2	-0.08274	-0.01479	-0.22708	0.231318	0.055992
PTPN14	-0.08807	0.027729	-0.11725	-0.00449	-0.17428
CENPF	0.386364	0.408332	-0.16154	0.438404	-0.20992
KCNK2	-0.00155	0.106022	-0.04671	0.145406	0.163216
KCTD3	0.060157	0.136083	-0.08433	-0.00876	-0.2639
USH2A	-0.17719	0.063563	0.093049	-0.25879	0.202715
ESRRG	0.433356	0.456388	-0.26988	0.269681	-0.02268
GPATCH2	0.196379	0.190059	0.324872	0.000175	-0.29966
SPATA17	0.141308	0.282791	0.086475	-0.13109	-0.12209
RRP15	0.329912	0.312705	-0.3749	0.169704	-0.08558
TGFB2	-0.13521	0.058331	0.293798	0.050003	0.127015
LYPLAL1	-0.30847	-0.37072	0.42449	-0.26907	0.133792
SLC30A10	-0.09602	-0.21679	-0.1337	-0.12652	0.042463
BPNT1	0.028718	-0.04157	0.372918	-0.13756	-0.12097
IARS2	0.497174	0.302453	-0.05652	0.204392	-0.26668
RAB3GAP2	0.21625	0.036636	-0.22682	0.229764	-0.17102
MARK1	0.098176	0.287845	-0.38576	0.072169	0.120156
C1orf115	-0.37708	-0.17513	-0.23195	0.002882	0.498531
HLX	0.006377	-0.02823	-0.17155	0.045092	-0.29136
DUSP10	-0.29533	-0.35026	0.323038	-0.39021	0.185838
TAF1A	0.135048	0.174189	-0.11791	0.006358	-0.18696
MIA3	-0.01592	0.000191	0.179347	0.067057	0.036629
AIDA	-0.02487	0.109348	-0.09604	-0.09883	0.024489
BROX	0.109105	0.131813	0.144285	-0.17966	-0.05267
FAM177B	-0.15198	0.093251	0.280862	0.009966	-0.09272
DISP1	0.130334	0.023216	-0.0473	0.143206	-0.409
TLR5	-0.27017	-0.29434	0.270712	-0.32877	-0.18705
SUSD4	-0.05744	0.140205	-0.28176	0.09993	0.405108
CAPN8	-0.0723	-0.20432	0.16202	-0.12021	-0.09959
CAPN2	-0.06029	-0.16945	0.207426	-0.1789	0.047786
TP53BP2	-0.17142	-0.01813	-0.13239	-0.12077	0.285683
FBXO28	0.255488	0.325239	-0.09476	0.267971	0.042288
DEGS1	0.296875	0.194444	0.131168	-0.00094	-0.33385
NVL	0.213313	0.340212	-0.22017	0.045884	-0.2754
CNIH4	0.301611	0.202025	-0.05974	0.192111	-0.44213
WDR26	0.177859	0.027078	0.285902	0.124999	-0.19518
CNIH3	-0.0342	-0.01993	-0.2014	-0.09544	-0.09446
DNAH14	-0.24049	-0.17434	-0.30977	-0.10394	0.004472
LBR	0.312842	0.330324	0.187552	0.133385	-0.32411
ENAH	0.208313	0.249299	-0.0395	-0.04641	-0.05945
SRP9	0.033564	0.032023	-0.02409	0.110978	0.217457
EPHX1	-0.26917	-0.27097	0.220684	-0.32815	0.208872
TMEM63A	-0.27275	-0.48383	0.458932	-0.38582	-0.09111
LEFTY1	-0.16886	-0.23431	-0.06828	0.081034	0.395931
PYCR2	-0.15502	-0.21287	0.424428	-0.25861	-0.0657
LEFTY2	-0.05715	0.044029	0.112926	0.313307	0.05933
SDE2	0.078084	0.082612	-0.14306	-0.00892	-0.14783
ACBD3	0.404416	0.295236	-0.05883	-0.01305	-0.20584
LIN9	0.063972	0.339138	-0.15332	-0.00888	-0.0265
PARP1	0.032778	-0.11196	0.132939	-0.25242	-0.17552
ITPKB	-0.50149	-0.5855	0.191561	-0.45946	0.073289
PSEN2	0.024584	0.297234	-0.07779	0.151272	0.008702
CDC42BPA	-0.2545	-0.0569	-0.16045	-0.25886	0.161735
ZNF678	0.433827	0.526649	-0.18898	0.075947	-0.22445
JMJD4	0.291893	0.270441	-0.1662	0.208256	-0.15637
SNAP47	0.101938	0.270249	-0.2565	0.218557	0.215803
ARF1	-0.08862	-0.15911	-0.20109	0.230487	0.19111
C1orf35	0.271687	0.260524	-0.2047	-0.1229	-0.19312
MRPL55	-0.06914	-0.12196	-0.16288	0.144897	-0.07033
GUK1	-0.26007	-0.32095	0.15159	-0.0574	0.264684
GJC2	-0.39331	-0.61791	0.342358	-0.41788	0.019004
IBA57	0.11694	0.225026	0.078806	0.122997	-0.13964
OBSCN	0.32502	0.280408	-0.14967	0.141464	-0.05837
TRIM11	-0.1366	0.071648	-0.15997	0.066621	-0.1199
TRIM17	0.135017	0.23788	-0.11286	0.233776	0.064582
RNF187	-0.03352	-0.09235	-0.19818	0.120694	0.11183
RHOU	-0.27023	-0.47791	0.211787	-0.32913	0.117208
RAB4A	0.012169	-0.0766	0.193514	0.057829	0.174904
CCSAP	-0.07736	-0.08505	0.057195	0.018262	0.252437
ACTA1	-0.32699	-0.17192	-0.11581	0.099322	0.420807
NUP133	0.518397	0.442788	-0.06101	0.259113	-0.29587
ABCB10	0.227295	0.246056	-0.17239	0.188104	-0.04718
TAF5L	0.039245	0.095809	-0.06848	-0.0411	-0.06917
URB2	0.171944	0.119291	-0.03393	0.061852	-0.13583
GALNT2	-0.04754	0.051525	-0.03888	0.105334	-0.0769
PGBD5	-0.27505	-0.18717	-0.43499	-0.06005	0.480392
COG2	0.446045	0.421335	-0.0949	0.220505	-0.12294
AGT	-0.07711	-0.08079	-0.12697	-0.18186	-0.09612
CAPN9	-0.05255	-0.12579	0.171761	-0.28507	-0.16879
C1orf198	-0.26053	-0.38957	0.291798	-0.46955	0.069487
TTC13	0.115301	0.230607	0.05467	-0.0079	-0.15692
ARV1	0.255577	0.404615	-0.12585	0.119037	-0.11346
FAM89A	-0.10789	-0.17395	-0.0262	-0.00971	0.259763
TRIM67	0.413591	0.34919	-0.28476	0.413334	-0.16357
C1orf131	0.339751	0.289828	-0.05262	0.016983	-0.34452
GNPAT	0.230258	0.334739	-0.00693	0.008148	-0.05252
EXOC8	0.000559	-0.11253	0.228505	0.048232	0.003982
SPRTN	0.191655	0.138277	0.092696	0.088898	-0.01444
EGLN1	0.274608	0.302493	-0.07671	0.064094	0.072929
TSNAX	-0.26065	-0.24884	0.190722	-0.02892	0.11654
DISC1	0.227823	0.211052	-0.18022	0.203142	0.005844
SIPA1L2	0.342309	0.441543	-0.15247	0.126053	-0.21904
MAP10	-0.02167	0.126675	0.039739	-0.05014	0.03207
NTPCR	0.429855	0.468604	-0.18412	0.081368	-0.24383
KCNK1	-0.53451	-0.53044	-0.04335	-0.20252	0.594284
SLC35F3	-0.32138	-0.37658	-0.31289	0.083581	0.626764
COA6	0.323445	0.262804	-0.28347	0.306032	0.146641
TARBP1	-0.15683	-0.02057	-0.13027	0.272144	0.07571
IRF2BP2	0.029441	-0.10843	0.086491	-0.05588	0.013925
TOMM20	0.007627	-0.02449	-0.32458	0.116914	0.286107
RBM34	0.208609	0.366394	0.072064	0.004837	-0.27965
ARID4B	-0.13906	-0.07573	0.22068	-0.36218	-0.16924
GGPS1	0.116788	0.067523	-0.24298	0.084379	0.337325
TBCE	0.006974	0.045508	0.049457	0.143729	-0.24183
B3GALNT2	0.236225	0.181015	-0.09645	0.082105	-0.2124
GNG4	0.2873	0.334738	-0.44964	0.161618	0.167791
LYST	-0.02254	0.256553	0.166322	-0.03981	-0.13885
NID1	0.452516	0.325946	-0.1276	0.468498	-0.28161
GPR137B	-0.10528	-0.1263	0.174466	-0.16682	0.026812
EDARADD	0.203186	0.195733	-0.02904	0.351885	-0.12677
LGALS8	-0.07897	0.015375	-0.09411	-0.10109	0.135792
HEATR1	0.273749	0.231774	-0.04494	0.174495	-0.28703
ACTN2	-0.33368	-0.5148	0.151879	-0.26288	0.182847
MTR	-0.00359	0.228182	0.100527	0.001033	-0.22427
RYR2	-0.38978	-0.18265	-0.23231	-0.13864	0.496124
CHRM3	0.228987	0.291697	-0.26898	0.091803	0.140409
FMN2	-0.11573	0.185049	0.043514	-0.17302	0.271496
GREM2	-0.32809	-0.21506	-0.25185	-0.02552	0.49497
RGS7	-0.30898	-0.01283	-0.30013	-0.02405	0.561785
FH	0.026802	-0.0714	0.053696	-0.08246	0.065389
KMO	-0.12341	-0.02759	0.108609	-0.1287	-0.01547
OPN3	0.55227	0.284673	-0.23419	0.272061	-0.12685
CHML	0.005764	0.28971	-0.10489	-0.01145	0.216176
WDR64	-0.07252	0.146426	0.104387	-0.10963	0.068952
EXO1	0.286262	0.319868	-0.15919	0.245884	-0.0617
PLD5	0.06292	-0.05306	-0.0727	0.147522	-0.05492
CEP170	-0.04591	-0.1789	0.323552	-0.09938	-0.16288
SDCCAG8	-0.17447	-0.13182	0.247435	-0.15892	-0.07097
AKT3	-0.00065	0.077655	-0.09751	-0.08431	0.140266
ZBTB18	-0.2018	0.092069	-0.22868	-0.07804	0.351664
DESI2	0.388622	0.295683	0.166111	0.345425	-0.33526
HNRNPU	0.114434	0.270528	0.049965	0.044669	-0.17346
EFCAB2	-0.01394	0.258128	0.00957	-0.09935	0.120048
KIF26B	0.222977	0.311408	-0.10626	0.168115	-0.00991
SMYD3	0.230141	0.262243	-0.03796	-0.01007	-0.0173
TFB2M	0.276722	0.264663	-0.25777	0.258538	0.023959
CNST	-0.04272	0.291495	-0.07078	0.065277	0.194627
SCCPDH	-0.14522	-0.43462	0.238634	-0.09891	-0.0542
AHCTF1	0.27293	0.305588	-0.18397	-0.03522	-0.2201
ZNF695	-0.07809	0.127044	0.039217	0.090509	0.08058
ZNF670	-0.09727	-0.09518	0.000697	0.023905	0.292607
ZNF669	0.43972	0.331462	-0.04075	0.340353	-0.29043
ZNF124	-0.1868	-0.03494	0.199562	-0.12343	0.056994
ZNF496	-0.07125	-0.27229	-0.12448	-0.01382	-0.13379
NLRP3	-0.21526	-0.09835	0.318997	-0.28972	0.007426
TRIM58	-0.16504	-0.28158	0.267293	0.004898	-0.07763
OR2L13	-0.19086	-0.37715	0.102872	-0.25437	-0.01915
OR2L2	-0.20466	-0.38517	0.136332	-0.08966	0.07916
OR14I1	-0.11174	0.179064	-0.10566	-0.06228	0.203765
LYPD8	-0.2719	-0.21357	-0.21906	-0.13587	0.225627
SH3BP5L	-0.08928	0.036782	0.10159	0.13792	0.124942
ZNF672	0.053023	-0.07924	-0.07565	0.123347	0.030838
ZNF692	0.127614	0.12108	-0.04397	0.146534	-0.21579
PGBD2	-0.13521	-0.12925	0.257198	0.008287	-0.19755
ZMYND11	-0.20684	-0.15758	-0.15706	-0.259	0.205875
DIP2C	-0.19455	-0.33804	0.039284	-0.26642	0.243718
PRR26	-0.12315	-0.18201	-0.01794	-0.19294	-0.02112
LARP4B	-0.16583	-0.18121	0.029042	-0.03582	0.165765
GTPBP4	0.284308	0.193368	-0.05266	0.130953	-0.05299
IDI2	0.038255	0.015452	0.055455	-0.07403	0.057323
IDI1	0.162732	0.049092	-0.26655	0.075775	0.03686
WDR37	-0.16595	-0.04623	-0.16105	0.225271	0.256734
ADARB2	-0.33194	-0.51785	0.112205	-0.29069	0.167632
PFKP	-0.1189	-0.03172	-0.27551	0.227005	0.464179
PITRM1	-0.1357	-0.28782	-0.10348	0.282492	0.26128
KLF6	0.160546	-0.08672	0.207359	-0.02132	-0.26187
AKR1E2	0.045133	0.062988	0.19098	0.08582	-0.03131
AKR1C1	-0.03031	0.000985	-0.2307	-0.10762	0.235538
AKR1C2	0.165771	0.078842	-0.26684	-0.15563	0.196257
AKR1C3	0.163406	0.060026	0.124133	-0.15132	-0.12027
NET1	-0.08623	-0.01162	-0.15769	-0.14854	0.061716
ASB13	0.012273	-0.0338	0.248857	-0.01518	-0.13115
GDI2	0.027134	-0.20677	0.075633	0.167938	-0.06782
ANKRD16	0.36298	0.247744	-0.31755	0.28634	-0.00437
IL15RA	-0.07307	-0.07949	0.342868	-0.07654	-0.20256
IL2RA	-0.10218	-0.0776	-0.07305	-0.03441	-0.15763
RBM17	-0.03506	-0.07298	-0.12801	-0.05838	0.067112
PFKFB3	-0.25676	-0.30726	0.274075	-0.09729	-0.02156
PRKCQ	-0.43886	-0.61296	0.033982	-0.47195	0.136921
SFMBT2	0.112382	0.063865	0.328189	-0.20144	-0.20687
ITIH5	-0.07883	-0.20135	-0.08673	0.206328	0.053802
ITIH2	-0.07855	-0.27429	-0.04614	-0.15728	0.297941
KIN	0.159384	0.239469	-0.19871	0.081198	-0.26414
TAF3	0.114296	0.146421	-0.132	-0.19585	-0.0739
GATA3	0.430134	0.251724	-0.22659	0.202232	-0.11755
CELF2	-0.21289	0.007461	-0.35742	-0.00148	0.409924
USP6NL	0.093089	0.062982	-0.09341	-0.12995	-0.06694
ECHDC3	-0.34596	-0.37028	0.312833	-0.31102	0.183568
PROSER2	0.321489	0.089889	-0.08617	0.514274	-0.08287
UPF2	-0.25536	-0.06524	-0.42122	-0.14905	0.325066
DHTKD1	0.41202	0.329538	-0.19981	0.049578	-0.17956
SEC61A2	-0.20774	-0.34251	0.137599	-0.12222	0.191623
NUDT5	0.144798	0.124775	0.029419	0.291323	-0.07002
CDC123	-0.02844	-0.04335	-0.23248	0.210516	0.048329
CAMK1D	-0.25154	-0.01002	-0.33935	-0.00988	0.585171
CCDC3	-0.00485	-0.07644	-0.13581	0.320581	0.364234
OPTN	-0.52001	-0.56287	0.111365	-0.44651	0.368952
MCM10	0.305219	0.327288	-0.11917	0.393795	-0.23319
UCMA	-0.11885	0.123093	-0.1356	-0.06189	0.189983
PHYH	-0.35681	-0.31939	0.305144	-0.27311	0.197148
SEPHS1	0.428715	0.327015	-0.22029	0.216099	-0.04478
BEND7	0.388877	0.359569	-0.39566	0.227858	0.036814
PRPF18	-0.00576	0.071372	-0.12171	0.136559	-0.18289
FRMD4A	-0.15007	-0.18343	-0.00813	-0.1065	0.182359
FAM107B	-0.23388	-0.40343	0.218358	-0.48192	-0.0085
CDNF	-0.15619	-0.16049	-0.14074	-0.11002	0.343249
HSPA14	0.037206	0.068253	-0.06486	0.115577	0.091393
SUV39H2	-0.02391	-0.02145	-0.34009	0.22413	0.044068
DCLRE1C	-0.05417	-0.06632	0.204511	-0.19691	-0.1369
MEIG1	-0.19586	-0.08272	0.053673	-0.20356	0.228662
OLAH	-0.20422	-0.00986	-0.2795	0.111343	0.240763
ACBD7	-0.25313	-0.14004	-0.31676	-0.12832	0.4522
RPP38	0.149769	0.02645	0.172228	0.068665	-0.09812
NMT2	0.01057	0.102955	-0.20687	0.338862	0.47183
FAM171A1	-0.32499	-0.50809	0.333309	-0.24091	0.128014
ITGA8	0.168733	-0.03303	0.316622	0.195653	-0.00286
PTER	-0.33002	-0.24706	-0.17059	0.01293	0.590631
C1QL3	-0.21454	0.024755	-0.06618	0.00187	0.30313
RSU1	0.158441	-0.01656	-0.01149	0.080782	-0.17661
CUBN	0.281741	0.196404	0.039868	0.210872	-0.16623
TRDMT1	0.011535	-0.05545	-0.20029	0.074186	0.188814
VIM	0.095721	0.052769	0.187657	0.082113	-0.05533
STAM	-0.29759	-0.4031	0.03641	-0.33881	0.226774
MRC1	-0.12389	-0.14316	0.333637	-0.2565	-0.20722
SLC39A12	-0.54325	-0.41559	0.019144	-0.26158	0.65141
CACNB2	-0.10753	0.112286	-0.34556	0.098038	0.386483
NSUN6	-0.03793	-0.06975	-0.10174	0.02601	-0.17908
ARL5B	0.097652	0.207587	-0.25523	0.181393	0.169929
PLXDC2	-0.14647	-0.31084	0.398654	-0.23478	-0.15488
NEBL	-0.483	-0.39756	0.131722	-0.39014	0.546653
SKIDA1	-0.24116	-0.1489	0.082397	-0.18481	0.015485
MLLT10	-0.09592	0.035381	0.259699	-0.08145	-0.24356
DNAJC1	0.079073	-0.06672	0.165642	-0.13507	-0.13725
COMMD3	-0.23834	-0.33399	0.178152	-0.15973	-0.00749
SPAG6	-0.22192	-0.14027	0.221432	-0.16285	0.170759
PIP4K2A	-0.39346	-0.56737	0.126291	-0.42173	0.137415
ARMC3	-0.15348	0.084137	0.193566	-0.25468	-0.0486
MSRB2	-0.24838	-0.28014	-0.22997	-0.15302	0.370454
C10orf67	-0.32219	-0.00742	-0.05253	-0.08149	0.208211
OTUD1	-0.19206	-0.2192	0.224461	-0.33945	-0.01628
KIAA1217	0.075451	0.248734	0.017952	-0.1537	0.103918
ARHGAP21	-0.3171	-0.51285	0.110145	-0.35413	0.168079
PRTFDC1	0.269675	0.155259	-0.12215	-0.05193	0.204557
ENKUR	0.178665	0.183945	-0.10091	0.111907	0.138485
THNSL1	0.300238	0.204535	-0.23074	0.196202	0.07265
GPR158	0.340859	0.385616	-0.2492	0.147997	-0.02695
MYO3A	-0.05466	0.016756	0.175808	0.070884	0.112417
GAD2	-0.36534	-0.10547	-0.20293	-0.0609	0.502001
APBB1IP	-0.29143	-0.43762	0.263822	-0.08583	-0.073
PDSS1	0.017871	0.128095	-0.00937	0.05868	-0.05074
ABI1	-0.24706	-0.16467	0.074744	0.042837	0.227636
ANKRD26	0.134792	0.244663	-0.34648	0.019637	-0.01589
YME1L1	0.107165	0.074814	0.018723	0.381628	0.054091
MASTL	0.200427	0.123473	-0.02441	-0.00924	-0.12982
ACBD5	-0.1177	-0.02364	-0.15257	-0.17394	0.115141
RAB18	0.005974	-0.07013	-0.35836	0.014113	0.219554
MKX	-0.21941	0.007555	-0.10114	-0.10385	0.235736
ARMC4	-0.07627	-0.10416	0.264953	-0.06715	0.13253
MPP7	-0.17152	-0.03331	-0.12288	-0.10256	0.379151
WAC	-0.185	-0.30307	-0.17832	-0.02246	0.304037
BAMBI	0.290721	0.126952	0.079258	-0.00115	-0.19321
SVIL	0.064738	0.1529	-0.20918	0.07503	-0.01971
MTPAP	0.201575	0.172217	-0.37538	-0.04414	-0.03053
MAP3K8	-0.11876	-0.13817	0.057846	0.119026	-0.01142
ZNF438	-0.25075	-0.36319	0.137816	-0.23052	-0.0239
ZEB1	0.589076	0.578991	-0.38354	0.318331	-0.27893
ARHGAP12	0.352946	0.38211	-0.27572	-0.00901	-0.14227
KIF5B	-0.21073	-0.24699	0.067978	-0.20548	-0.03176
EPC1	0.354727	0.229472	-0.14957	0.127709	-0.09611
CCDC7	-0.34296	-0.2326	-0.15202	-0.29967	0.142047
ITGB1	0.282853	0.062746	-0.18868	0.291536	-0.16652
NRP1	-0.11404	-0.14884	-0.15195	-0.04358	-0.14182
PARD3	0.294705	0.20904	-0.12753	0.023405	0.028069
CUL2	0.091824	0.245123	0.129016	0.09962	-0.16879
CREM	-0.22418	-0.15499	0.070307	-0.03669	0.131465
CCNY	-0.21725	-0.19225	-0.13657	-0.24163	0.440146
GJD4	-0.12153	-0.18313	-0.12371	-0.14764	0.291924
FZD8	-0.17943	-0.20923	0.140798	0.190105	0.269499
ZNF248	0.02093	0.113278	-0.21896	0.05805	0.171778
ZNF25	-0.08226	-0.06895	-0.47015	0.042264	0.329435
ZNF33A	-0.07983	-0.16506	-0.00734	-0.23126	0.134745
ZNF37A	-0.07128	-0.12422	0.054955	-0.15544	-0.11598
ZNF33B	0.031026	0.143441	-0.01653	0.227871	0.223445
BMS1	0.269526	0.08441	-0.22875	0.226133	-0.00477
RET	0.3157	0.220005	-0.19075	0.397844	-0.03538
CSGALNACT2	-0.01886	0.079231	0.122622	-0.09828	-0.18931
RASGEF1A	-0.46598	-0.21277	0.057578	-0.02298	0.460186
FXYD4	-0.26905	-0.49606	0.276105	-0.30305	0.07288
HNRNPF	0.173337	0.018731	0.217378	-0.10466	-0.30327
ZNF239	-0.00406	0.001725	-0.2236	-0.13999	-0.15111
ZNF485	0.217312	0.085506	-0.05152	0.239604	-0.12331
ZNF32	-0.09213	-0.14472	0.27289	-0.11594	-0.05354
CXCL12	-0.3421	-0.43922	0.415156	-0.07855	-0.01942
RASSF4	0.182174	0.179122	0.054274	-0.0386	-0.30757
ZNF22	0.488824	0.439149	-0.21153	0.126871	-0.29444
ALOX5	-0.21128	-0.3064	0.425199	-0.14092	-0.15578
ZFAND4	0.01092	-0.0771	0.172202	-0.16225	-0.19549
AGAP4	-0.07015	-0.02575	-0.07205	0.186915	0.147946
SYT15	0.171442	0.272208	-0.06632	0.175656	0.001441
ZNF488	-0.25367	-0.45878	0.139398	-0.09251	0.014413
GDF10	-0.20933	-0.27718	-0.19148	0.032516	0.260497
FRMPD2	0.140677	0.117604	-0.13562	-0.04486	-0.05822
MAPK8	0.10268	-0.00576	0.114661	-0.1115	-0.0868
ARHGAP22	-0.3233	-0.54562	0.297802	-0.33843	-0.05899
WDFY4	-0.27836	-0.4675	0.423015	-0.20696	-0.0921
LRRC18	-0.07674	0.013217	0.208935	-0.16478	0.117019
VSTM4	0.0413	-0.12413	0.055272	-0.07889	-0.02282
ERCC6	-0.03495	0.070501	0.128687	-0.03663	0.071255
SLC18A3	0.026053	-0.05411	-0.26623	-0.04758	-0.1462
OGDHL	-0.35004	-0.18042	-0.31143	-0.10458	0.395916
PARG	-0.12394	-0.17067	-0.05397	-0.13022	-0.23443
NCOA4	-0.27384	-0.50149	0.093677	-0.31986	0.024851
TIMM23	0.000959	0.038527	-0.08969	-0.00308	0.077511
AGAP6	0.103956	0.06533	0.009892	0.18663	-0.10146
SGMS1	-0.31126	-0.44695	0.009127	-0.35935	0.172387
A1CF	-0.21152	-0.24845	-0.00115	-0.07823	0.302186
PRKG1	-0.09195	-0.19697	0.050393	-0.07281	0.331319
CSTF2T	-0.08997	-0.17842	0.061881	-0.06447	-0.09199
DKK1	-0.20599	-0.10653	-0.1495	-0.17967	-0.14023
PCDH15	0.34352	0.406047	-0.28893	0.046885	-0.09477
ZWINT	0.393682	0.414851	-0.26872	0.587989	-0.16727
IPMK	0.120789	0.033794	0.163267	0.015276	-0.12998
CISD1	0.288336	0.141001	-0.31216	0.223699	0.115744
UBE2D1	0.035359	-0.0386	0.097554	-0.12266	-0.13026
TFAM	0.472494	0.482997	-0.40165	0.208636	-0.10601
BICC1	0.044863	0.10235	0.09863	0.035452	-0.19611
PHYHIPL	0.165763	0.075473	-0.27047	0.178271	0.028799
FAM13C	-0.2768	-0.34423	0.130567	-0.27272	-0.04712
SLC16A9	-0.06531	-0.09324	0.129528	-0.2198	0.074568
CCDC6	-0.09137	-0.08228	-0.17965	-0.12929	0.171598
ANK3	-0.44521	-0.43506	-0.07735	-0.31449	0.382982
CDK1	0.419535	0.359829	-0.18767	0.525666	-0.23472
RHOBTB1	-0.10672	-0.07083	0.402876	-0.23837	0.083822
TMEM26	-0.02489	-0.00714	0.029338	-0.15724	-0.25576
ARID5B	0.275661	0.09846	-0.08484	0.023138	0.045548
RTKN2	0.381689	0.401608	-0.38159	0.36888	-0.0757
ZNF365	-0.53797	-0.3476	-0.13146	-0.27469	0.569197
ADO	0.23866	0.04081	-0.10972	-0.14375	-0.00787
EGR2	0.06084	0.014428	0.204619	-0.15137	-0.16108
NRBF2	0.159191	0.062912	0.058112	-0.02771	0.176479
JMJD1C	0.357276	0.310637	-0.31503	0.179054	-0.09428
REEP3	-0.20499	-0.27574	0.26515	-0.28574	-0.13266
CTNNA3	-0.22181	-0.26286	0.13873	-0.25737	0.007933
LRRTM3	0.409028	0.356488	-0.33889	0.017075	-0.02239
DNAJC12	-0.23644	-0.24371	-0.32148	0.131798	0.3746
SIRT1	0.038564	-0.07269	-0.19051	0.022236	0.163263
HERC4	-0.35745	-0.27519	-0.08225	-0.00957	0.184162
ATOH7	-0.14674	0.093379	-0.15994	0.065523	0.122646
PBLD	-0.05375	-0.0913	-0.09255	-0.06663	0.156686
HNRNPH3	-0.00552	-0.09356	-0.13666	-0.12858	-0.05237
RUFY2	-0.33557	-0.45816	0.112467	-0.28719	0.181205
DNA2	0.107713	-0.0323	-0.05746	0.196291	0.048943
SLC25A16	-0.11778	-0.16659	-0.1661	-0.18731	0.099446
TET1	0.356571	0.418121	-0.22255	0.098572	0.008443
CCAR1	0.173162	0.22591	-0.16313	-0.02838	-0.21027
STOX1	-0.40658	-0.3047	0.079228	-0.2002	0.467892
DDX50	0.039099	0.05802	-0.49002	0.20445	0.130064
DDX21	0.404167	0.330517	-0.33347	0.177092	-0.24332
SRGN	0.047476	0.012689	0.263417	0.075145	-0.30124
VPS26A	-0.26686	-0.38893	0.08882	-0.24099	0.057675
SUPV3L1	-0.14818	-0.08999	-0.25865	0.071928	0.047606
HKDC1	0.128595	0.090784	0.157977	-0.07115	-0.18155
HK1	-0.31766	-0.2356	-0.24181	-0.03524	0.525991
TACR2	-0.24835	-0.14134	0.023018	-0.02044	0.18962
TSPAN15	-0.2547	-0.35864	0.393713	-0.37	-0.06249
COL13A1	-0.11433	-0.10881	-0.15398	-0.10084	-0.15204
AIFM2	-0.2122	-0.07827	0.208227	-0.08511	0.226187
TYSND1	0.274194	0.228811	-0.09257	0.242763	-0.09337
SAR1A	0.046692	-0.08023	-0.00387	0.043573	0.0595
PPA1	-0.05689	-0.04789	-0.17194	-0.08617	0.156152
LRRC20	0.308946	0.303005	-0.32843	0.127169	-0.10728
EIF4EBP2	0.235981	0.271302	-0.31885	0.095643	0.174784
NODAL	0.471719	0.22195	-0.14163	0.359885	-0.16576
PALD1	0.135052	0.09405	0.283137	0.069734	-0.24303
PRF1	-0.07989	-0.21846	0.101305	0.111935	-0.20485
ADAMTS14	-0.32287	-0.37585	0.238532	-0.32469	-0.03549
SGPL1	0.15043	0.133702	0.022846	-0.16609	-0.22113
PCBD1	-0.36944	-0.24299	0.055265	-0.04333	0.488888
UNC5B	-0.25651	-0.52841	0.461535	-0.18034	-0.04837
SLC29A3	-0.1599	-0.34016	-0.01593	-0.08807	0.084391
CDH23	-0.19353	-0.3962	0.3115	-0.3159	0.052286
C10orf105	-0.25476	-0.26775	0.170791	-0.28915	0.336773
PSAP	-0.16345	-0.46767	0.342261	-0.21018	-0.01471
CHST3	0.034237	-0.24127	0.012249	0.144132	0.050036
SPOCK2	-0.25819	0.060824	0.062859	-0.19557	0.40927
ASCC1	0.019346	-0.31225	0.193577	-0.04152	0.0363
ANAPC16	-0.00329	-0.10233	0.134198	-0.06614	-0.00729
DDIT4	0.541395	0.403199	-0.21187	0.262168	-0.2842
DNAJB12	-0.22317	-0.42839	0.04578	-0.20857	0.13743
MICU1	-0.15078	-0.27261	-0.24288	0.032378	0.36804
MCU	-0.12724	-0.00256	-0.2097	-0.06239	0.33284
P4HA1	0.1506	0.183655	0.068816	-0.0333	-0.29537
NUDT13	-0.16431	-0.13114	-0.21815	-0.13922	-0.09348
ECD	-0.10249	-0.16414	-0.1839	0.176325	0.10496
FAM149B1	-0.03419	0.022111	0.067051	-0.03928	0.162407
DNAJC9	0.028424	-0.05227	-0.03859	-0.05688	-0.07318
MRPS16	-0.13546	-0.06066	0.083696	-0.13175	0.124135
ANXA7	-0.56565	-0.48923	0.043978	-0.34026	0.295848
MSS51	-0.05372	-0.07923	-0.0319	0.175625	-0.07178
PPP3CB	-0.20821	-0.02575	-0.39671	0.160789	0.461034
USP54	-0.1902	-0.40013	0.09671	-0.32929	-0.03943
MYOZ1	0.045705	-0.01107	0.114488	-0.16941	-0.03843
SYNPO2L	-0.01061	0.166407	0.478349	-0.0096	-0.20133
AGAP5	0.199787	0.157999	0.151966	-0.06701	-0.06346
SEC24C	0.002818	-0.0725	-0.09256	0.174283	0.016859
FUT11	-0.11875	0.091898	-0.263	0.060738	-0.04777
CHCHD1	0.149946	0.121987	-0.13259	0.248734	0.020614
ZSWIM8	-0.33471	-0.35976	-0.19704	-0.10797	-0.05603
NDST2	-0.09764	-0.06853	0.166477	0.069589	0.126685
CAMK2G	-0.28466	-0.15761	-0.2178	-0.24238	0.479149
C10orf55	-0.06911	-0.02169	-0.05462	-0.02671	-0.02443
PLAU	0.163207	0.143787	0.397644	-0.01471	-0.23991
VCL	0.110253	-0.09139	0.056724	0.285887	-0.12152
AP3M1	0.010239	-0.06697	0.07127	-0.12266	-0.11465
ADK	0.0321	0.173985	-0.02909	0.003123	-0.06785
KAT6B	0.104636	0.201871	-0.28267	-0.16299	0.06752
SAMD8	0.05028	-0.23397	0.105326	-0.15482	0.120732
VDAC2	0.13687	-0.07765	-0.23729	0.057735	0.105549
COMTD1	-0.14203	-0.11796	-0.14683	-0.03289	0.154381
ZNF503	0.563738	0.367327	-0.21795	0.475079	-0.07091
KCNMA1	-0.35828	-0.14295	-0.16245	-0.1248	0.584171
DLG5	0.2686	0.082775	-0.42167	0.098715	-0.16821
POLR3A	0.098427	0.104056	-0.55396	0.217762	0.14623
RPS24	0.097876	0.040073	-0.22999	0.3772	0.024594
ZMIZ1	0.090564	0.040451	-0.22738	0.02458	0.212622
PPIF	0.114064	-0.07622	0.064094	0.105579	-0.13506
ZCCHC24	-0.17031	-0.36435	0.149141	-0.22346	-0.01635
EIF5AL1	0.227422	0.175581	0.157479	0.000222	-0.17314
SFTPA2	-0.00806	0.072773	0.12746	-0.14134	-0.09881
SFTPD	-0.16914	-0.03623	0.31218	-0.04454	-0.02009
TMEM254	0.221577	0.223335	-0.29178	0.143471	0.216565
PLAC9	-0.117	-0.13217	-0.02302	0.222241	0.232031
ANXA11	-0.50859	-0.5286	-0.01738	-0.31872	0.302498
DYDC2	-0.17521	-0.06239	-0.07524	0.025246	0.272188
TSPAN14	-0.39645	-0.56806	0.027372	-0.173	-0.03906
SH2D4B	0.09084	0.055501	-0.11429	0.097923	0.136241
NRG3	-0.35285	-0.25065	-0.30408	-0.18983	0.672521
GHITM	-0.26819	-0.12922	-0.34798	-0.01297	0.430901
CDHR1	0.375642	0.407949	-0.34769	0.13672	-0.11693
LRIT2	0.149993	0.121483	-0.22245	0.229431	0.006901
RGR	-0.05098	-0.12852	-0.20928	0.068938	0.224313
CCSER2	-0.04264	-0.00492	-0.31228	0.152274	0.317049
GRID1	-0.02244	-0.02695	-0.21328	-0.12751	0.140149
OPN4	-0.09821	0.126414	0.07319	0.128365	0.128384
LDB3	-0.35243	-0.47466	0.268994	-0.36148	0.02221
BMPR1A	0.103352	0.062642	-0.21144	0.21052	0.039413
MMRN2	-0.00159	-0.13782	-0.08452	0.338956	-0.13
SNCG	-0.38426	-0.2184	-0.24928	-0.03052	0.454677
ADIRF	-0.61521	-0.55067	0.099841	-0.1397	0.555368
GLUD1	-0.05497	0.064629	-0.26491	-0.10615	0.206247
MINPP1	0.070254	0.044836	-0.12556	-0.01841	-0.20037
PAPSS2	0.171586	-0.02976	-0.01107	0.220989	-0.17381
ATAD1	0.172601	0.185351	-0.3203	0.193212	0.228376
KLLN	-0.19035	-0.17986	0.153447	-0.08127	0.275905
PTEN	-0.03105	0.032408	-0.42175	0.129984	0.271859
RNLS	-0.11865	0.014758	0.21979	-0.16752	0.021722
LIPF	0.036193	0.15164	-0.00992	-0.06772	-0.07989
ANKRD22	-0.12275	-0.10867	0.133083	0.087138	-0.08427
STAMBPL1	-0.06831	-0.08786	0.270202	-0.08073	-0.04701
ACTA2	0.069983	-0.15175	0.16317	0.204081	-0.12564
FAS	-0.28311	-0.25652	0.333974	-0.24325	0.079333
CH25H	-0.08994	-0.12556	0.303566	-0.11853	-0.24504
LIPA	-0.26606	-0.54438	0.412287	-0.32748	-0.21098
IFIT2	-0.39779	-0.36839	0.094859	-0.3591	-0.01152
IFIT3	-0.36474	-0.24198	0.053502	-0.33725	0.07361
IFIT1	-0.35952	-0.21599	-0.0391	-0.39271	0.070681
IFIT5	-0.12309	-0.13875	0.00281	-0.42251	0.007809
SLC16A12	0.007048	-0.13325	-0.19583	-0.02451	-0.14114
PANK1	0.175914	0.256209	-0.43653	0.081748	0.129448
KIF20B	0.115795	0.051577	-0.0883	0.446413	-0.00354
HTR7	-0.08082	0.180792	0.056007	-0.13744	-0.10525
RPP30	0.069084	-0.03477	-0.39748	0.09348	0.204933
ANKRD1	-0.17099	-0.19764	-0.10059	-0.17276	0.345774
PCGF5	-0.32708	-0.44677	-0.01419	-0.34865	0.113745
HECTD2	-0.1701	-0.05971	-0.11315	-0.07601	0.139308
PPP1R3C	-0.06116	0.010334	-0.31309	0.011935	0.350543
TNKS2	-0.0305	-0.05944	0.247777	0.065668	-0.13529
FGFBP3	0.361214	0.366238	-0.2755	-0.06057	-0.09691
BTAF1	0.21674	0.104535	-0.15421	0.140562	-0.1785
CPEB3	-0.28537	-0.10969	-0.29241	-0.01301	0.482624
IDE	-0.19594	-0.26475	0.112776	-0.2507	-0.25204
KIF11	0.324518	0.248014	-0.37959	0.5937	-0.21043
HHEX	-0.26933	-0.34549	0.395884	-0.25712	0.022657
EXOC6	-0.22043	-0.11641	-0.1772	0.034746	0.277076
CYP26A1	-0.01409	-0.10018	0.187018	-0.09689	-0.09663
MYOF	0.039661	0.028649	0.34453	-0.03813	-0.24866
CEP55	0.166866	0.142295	-0.10423	0.346981	-0.14821
FFAR4	-0.33498	-0.38448	0.306628	-0.14436	-0.00955
RBP4	-0.2043	-0.25415	-0.0896	0.016305	0.349639
PDE6C	0.170496	0.117335	-0.17353	0.279524	0.027958
FRA10AC1	-0.2443	-0.24137	-0.08492	-0.19428	0.13942
LGI1	-0.47708	-0.30037	-0.05579	-0.17918	0.647432
SLC35G1	0.003967	0.133381	0.016311	-0.10736	0.13099
PLCE1	-0.18046	-0.21646	0.036921	-0.20207	0.019716
NOC3L	0.157377	0.176931	0.004889	-0.03375	-0.2657
TBC1D12	-0.34511	-0.48969	0.37026	-0.35114	-0.04514
HELLS	0.201991	0.231251	-0.07865	0.298222	-0.15537
CYP2C8	-0.23321	-0.10554	-0.26904	-0.10427	0.175446
PDLIM1	0.265271	0.153479	0.042508	0.261567	-0.11962
SORBS1	-0.30691	-0.22298	0.111547	-0.38436	0.371074
ALDH18A1	0.315065	0.270498	-0.0016	0.30768	-0.12663
TCTN3	0.158435	0.121059	-0.10569	0.278005	0.037996
ENTPD1	0.20036	0.109072	-0.03027	0.314888	-0.12897
CC2D2B	0.04224	0.133442	-0.0588	-0.09489	-0.02328
CCNJ	0.037951	0.078368	0.162947	-0.0483	-0.33596
ZNF518A	0.084618	-0.03908	-0.00805	0.086162	-0.07346
BLNK	-0.3266	-0.32294	0.046577	-0.23598	-0.09253
OPALIN	-0.37477	-0.42034	0.058718	-0.36152	0.208043
TLL2	-0.29086	-0.46643	0.471085	-0.27027	0.142678
TM9SF3	0.017115	-0.01419	-0.0302	-0.10282	0.067595
PIK3AP1	-0.06189	-0.14017	-0.02064	-0.0473	0.118462
LCOR	-0.35641	-0.31533	-0.14432	-0.21848	0.172674
SLIT1	0.18696	0.46577	-0.33653	0.040792	0.117369
ARHGAP19-SLIT1	0.032703	0.113755	-0.22811	0.036611	0.313542
ARHGAP19	-0.0958	-0.21445	0.035549	0.124748	0.062982
FRAT1	0.066255	0.027732	-0.25398	0.156958	-0.06753
FRAT2	0.285046	0.302826	-0.05732	0.177833	-0.15226
RRP12	0.183423	0.037371	-0.02244	-0.07185	-0.07207
PGAM1	-0.21455	-0.18732	-0.16913	-0.27916	0.266343
EXOSC1	-0.14623	-0.13613	0.248791	-0.03447	-0.05572
ZDHHC16	0.196164	0.115128	-0.13508	0.158622	-0.18982
MMS19	-0.2113	-0.28401	-0.10264	-0.20092	-0.03798
UBTD1	-0.04623	-0.01597	0.106592	-0.05127	0.165753
ANKRD2	-0.03086	0.059577	-0.064	-0.09163	0.025756
HOGA1	0.170768	0.219394	-0.05528	-0.09233	-0.09886
MORN4	-0.06922	0.173199	-0.29895	0.061785	0.253892
PI4K2A	-0.37711	-0.32981	0.107118	-0.14566	0.273644
AVPI1	-0.34171	-0.43631	0.154445	-0.24636	0.275196
MARVELD1	0.298517	0.06525	0.28562	0.237473	-0.1775
ZFYVE27	-0.17248	-0.20559	0.126909	0.099226	0.219404
SFRP5	0.088106	0.054681	0.121903	-0.04181	-0.13506
GOLGA7B	-0.08372	0.097834	-0.3365	-0.02791	0.3098
CRTAC1	0.303316	0.280744	-0.31619	0.112088	-0.04081
R3HCC1L	-0.14912	-0.05437	0.00172	-0.17385	-0.03721
LOXL4	-0.08793	0.035801	-0.01399	-0.04488	0.214585
PYROXD2	-0.44866	-0.45243	0.499281	-0.33343	0.096247
HPS1	-0.59492	-0.70951	0.46016	-0.43015	0.249919
HPSE2	-0.29824	-0.1957	-0.11822	0.105749	0.142007
CNNM1	-0.39654	-0.21487	-0.29286	-0.01586	0.579747
GOT1	-0.40492	-0.28078	-0.25031	-0.02923	0.470527
NKX2-3	0.136972	0.300909	-0.02119	-0.01075	-0.05383
SLC25A28	-0.33588	-0.28092	-0.08128	-0.07677	0.340887
ENTPD7	-0.08379	-0.04389	-0.07672	0.110609	-0.04432
COX15	-0.18975	-0.13292	0.191568	-0.1305	-0.12992
CUTC	-0.16782	-0.23256	-0.02093	-0.28203	-0.04049
ABCC2	-0.07502	-0.10397	0.213678	-0.13306	-0.05017
DNMBP	0.142614	0.124268	-0.33349	-0.0111	-0.09575
ERLIN1	0.263712	0.002414	0.110232	0.21561	0.16104
CHUK	-0.05197	-0.03142	-0.07742	0.095689	0.197658
CWF19L1	0.126434	-0.13703	-0.286	-0.14006	-0.09382
BLOC1S2	-0.36361	-0.35583	0.138183	-0.17304	0.344793
PKD2L1	-0.08548	-0.19089	0.280631	-0.13309	-0.051
SCD	-0.16645	-0.33814	0.146528	-0.40823	0.050623
SEC31B	-0.04408	-0.09012	-0.03195	0.188461	-0.02763
NDUFB8	-0.43308	-0.39993	-0.20152	-0.08902	0.527902
HIF1AN	-0.12881	-0.14511	0.182988	-0.21635	-0.13297
PAX2	0.034586	0.030406	0.102711	0.122565	0.039148
SEMA4G	0.118847	0.412912	-0.29846	0.184869	0.254969
MRPL43	-0.07856	-0.1565	-0.11048	-0.13466	0.054588
LZTS2	-0.30361	-0.46969	0.050784	-0.30283	0.076532
PDZD7	-0.35667	-0.38763	-0.0412	-0.11136	0.164138
SFXN3	-0.18318	-0.38278	0.044382	-0.03831	0.046967
KAZALD1	0.104195	0.05815	-0.43913	0.138234	-0.12621
TLX1	0.510635	0.510735	-0.25393	0.259108	-0.21712
BTRC	-0.31177	-0.22791	-0.39802	-0.04152	0.49831
POLL	-0.13207	-0.22387	0.311507	-0.20223	-0.06081
DPCD	0.114577	0.107051	-0.02133	0.192611	0.305251
FBXW4	-0.41867	-0.45545	-0.04641	-0.45511	0.153186
NPM3	0.333215	0.26803	-0.29957	0.315999	-0.09288
KCNIP2	0.208211	0.240107	-0.27111	0.018183	0.091687
HPS6	-0.05311	-0.07853	-0.19703	-0.02157	0.307839
LDB1	-0.15075	-0.28034	0.105648	-0.14487	0.245441
PPRC1	0.324309	0.40804	-0.12171	0.42113	-0.19007
NOLC1	-0.26672	-0.19988	-0.04797	-0.2207	0.243626
ELOVL3	-0.01336	-0.20599	0.197348	0.104113	0.032639
GBF1	0.193115	0.123213	-0.1074	0.342852	0.163891
NFKB2	-0.04688	-0.02297	0.119315	0.049092	0.088097
PSD	-0.2881	-0.1488	-0.27154	0.133977	0.470201
FBXL15	-0.30052	-0.18024	-0.29608	-0.05639	0.435277
CUEDC2	0.085806	-0.00196	-0.09561	0.235401	0.079888
ACTR1A	-0.35932	-0.44087	0.090507	-0.32867	0.324699
SUFU	-0.03341	-0.15514	0.282629	-0.03387	-0.33549
TRIM8	0.045476	0.240589	-0.09459	-0.02843	-0.01927
ARL3	-0.19344	-0.05643	-0.29957	0.005931	0.42267
SFXN2	-0.14667	-0.19019	0.110403	0.073118	-0.23298
WBP1L	-0.04035	-0.21113	-0.11802	-0.22799	-0.01215
CYP17A1	-0.20635	-0.06375	-0.16386	-0.07827	0.240735
CNNM2	-0.22982	-0.26604	0.382448	-0.08474	0.038662
NT5C2	-0.10474	-0.23002	-0.03712	0.005583	0.184936
INA	-0.28207	-0.08706	-0.32308	-0.07074	0.455618
PCGF6	0.044218	0.154025	-0.1475	0.073547	0.23148
TAF5	-0.10629	-0.1632	-0.09291	0.070508	0.151006
PDCD11	0.14934	0.194911	-0.09265	0.210054	-0.18452
CALHM2	-0.23709	-0.23579	0.04222	-0.14064	0.201291
CALHM1	0.000525	0.032751	-0.30704	-0.08955	0.092628
SH3PXD2A	-0.50132	-0.60884	0.276274	-0.382	0.076189
SLK	-0.03895	-0.00034	-0.10372	-0.16792	0.127916
COL17A1	-0.22931	-0.31838	-0.03915	0.026413	0.314432
SFR1	-0.24517	-0.32969	0.275458	-0.26172	0.000846
GSTO1	-0.37813	-0.43358	0.098683	-0.14886	0.164455
GSTO2	-0.51677	-0.50731	0.185833	-0.27471	0.383467
ITPRIP	0.198489	0.105	-0.08937	0.079841	-0.17822
SORCS3	0.212741	0.237974	-0.30472	0.141855	0.165193
SORCS1	-0.00837	0.144541	-0.33372	-0.10883	0.348362
XPNPEP1	0.047627	-0.16314	0.09913	0.235944	-0.01758
ADD3	-0.45142	-0.42716	0.124193	-0.34927	0.298277
MXI1	-0.21031	-0.1923	0.053211	-0.41554	0.31766
SMNDC1	-0.19772	-0.17292	0.080126	-0.32049	-0.20814
DUSP5	-0.18821	0.049636	-0.23712	0.038131	0.289631
SMC3	0.234131	0.072855	-0.06346	-0.1407	-0.0849
RBM20	0.200863	0.007233	-0.06486	0.149122	-0.10744
PDCD4	-0.11996	-0.13931	-0.0238	-0.36175	-0.14052
BBIP1	0.094541	-0.10844	-0.03467	0.06006	0.074635
SHOC2	-0.40994	-0.31518	-0.3084	-0.21873	0.294687
ADRA2A	-0.1587	-0.12977	-0.21971	-0.02903	0.298396
GPAM	-0.23626	-0.14443	-0.30237	-0.0675	0.556831
ACSL5	-0.48256	-0.3927	-0.01035	-0.16023	0.131547
ZDHHC6	0.080991	0.09226	-0.15544	0.306286	0.263277
VTI1A	-0.24092	-0.33407	0.009973	-0.00467	0.121579
TCF7L2	-0.08816	0.08965	-0.31564	-0.05876	0.110166
HABP2	0.006625	-0.06225	-0.00597	0.050947	-0.00806
CASP7	-0.07333	-0.09211	0.019359	-0.0288	-0.04534
PLEKHS1	0.010795	-0.06444	0.167235	0.052568	-0.19992
DCLRE1A	0.13569	0.12288	-0.13146	0.007575	0.012191
NHLRC2	0.050044	0.042048	-0.184	0.104663	0.032249
ADRB1	-0.22031	0.088948	-0.13555	0.016338	0.339517
TDRD1	-0.11572	0.071615	0.009551	0.054141	0.134597
VWA2	0.106055	0.264087	0.010931	0.011598	-0.10986
AFAP1L2	0.351661	0.360879	-0.47192	0.232666	-0.11397
ABLIM1	-0.32462	-0.34001	0.012034	-0.21699	0.499063
FAM160B1	-0.28561	-0.14683	0.094052	0.105034	0.05393
TRUB1	0.016624	-0.0281	-0.24231	0.124824	0.341597
[truncated: 13,002 more rows]

## Sheet: Gene Modules
recGBM_proliferative (Module 1)	recGBM_neuronal (Module 2)	recGBM_inflammatory (Module 3)
NCSTN	PPP1R15A	FSTL5
SNX25	MECP2	KLHL26
SEC61B	CLOCK	NEK7
LMAN2L	PRPH2	WWOX
CTPS2	SPOCK2	STAT1
ARMC12	RMDN2	UNKL
ADAM8	VILL	MFSD8
CEMP1	KCNA6	SRSF5
QSOX1	EGR3	IFIT3
DDX31	DMKN	DEDD2
COMMD8	KLHDC1	FAM174B
HADH	TAB2	EPHX2
DHODH	MYO5A	FXYD3
PLRG1	PPFIA2	CLCN6
CALR	NXPH2	TNFSF12
FAM20C	KCNA4	MFN2
SLC25A1	CTNNA2	IFITM1
POLA1	CEP76	LARP1
COL6A2	TMEM47	ZNF415
AMIGO3	PCDH11X	ASB6
COL6A1	LYRM9	ZBTB17
LBR	CDS1	SLC44A3
ZNF217	NME5	KIAA0319L
RP9	SLC9B2	MYO7A
CEBPZ	FAM122A	IQCA1
SMO	CAMKMT	CTNND2
RASSF4	AP3M2	GRSF1
P4HA1	GSTM3	LRRC61
SIM2	CRIM1	AGL
HDAC2	PRRT3	DBT
DDX5	ARHGEF3	TSGA10
RFT1	C10orf67	LCNL1
CPSF4	ANKRD24	CAB39L
KCNJ14	ZC3H13	PPM1K
WNT5A	MXI1	C1orf87
BAZ1B	AK1	ZNHIT6
AASS	TJP1	PGRMC1
TGIF2	PYGM	ACADM
SLC16A4	OSTF1	CTF1
C4orf47	IFIT1	SELP
PDPN	LIX1	SELE
SRSF10	LPIN2	RPP25
NBPF10	YPEL5	RGS11
DPYSL3	CDC14A	MT1F
USP42	AKAP11	SCOC
ABCB6	ZSCAN18	ADD3
PABPC1	IDNK	OSBPL1A
SLC16A1	WFS1	SRCIN1
KIAA0040	SORBS1	RTN4
SETD6	HSPBAP1	DYNC1I1
WDR76	NFYB	SPEN
ANGPTL1	ZC2HC1C	NWD1
ZNF79	SEC62	RIOK3
SRGAP1	SLC25A30	SEC22C
RUNX1	KCTD2	TMEM74
CSNK1A1	PFN2	PAMR1
TAF1	PURA	FGD4
BARD1	STX2	PEBP1
METTL23	KATNAL1	AKAP3
SSR1	DENND4A	SLCO2A1
UBN1	MSI2	MEGF10
RFWD3	INIP	BAG3
NFATC2IP	CCDC112	EDIL3
TTC23	ZCCHC2	HACE1
METTL16	FSD1L	SNTA1
PRKRA	RXRG	CDC42SE2
NOA1	NEBL	SKP1
MC1R	TYW3	MAPK4
RFC2	USP2	HENMT1
IDH1	TGFBR3	FGFRL1
MIS18A	PPCDC	PAX6
STARD3NL	EPM2A	ANKRD35
PDAP1	CD99L2	MAP2K7
METRNL	ACTC1	CAB39
C8orf82	PPP1R1B	CCDC68
ELP3	ZFP28	FGFR3
PRKD2	CREBRF	CGNL1
HPS4	DPYSL2	FAM83H
GALK1	SERPINA5	RCAN2
PDIA4	DYNC1H1	FAM107A
PLEKHH3	COPS2	SLC6A12
MAML1	ARHGAP5	PPM1H
RCC2	GOT2	MYH7B
B4GALT3	ANK2	SIK3
ZKSCAN5	ATG2B	SERINC1
XPNPEP3	C4orf19	SERPINI1
NOM1	VAMP1	RALGPS1
SRSF11	PRDM8	MINK1
TEAD2	KIF1B	DNAJC6
RPIA	DDHD2	CALM2
ZNF10	TLN2	TSPYL5
ANKRA2	STXBP6	TPD52L1
RBM28	MTMR7	RNF146
FNBP4	SLC39A12	PDK2
RARRES1	RASAL1	PPP1R16B
TRIP10	TPRG1L	RPGRIP1
PLA2G4A	WDR7	PCP2
CCS	PITHD1	TM2D1
LYAR	DNAJC16	TACC1
TRAM2	STOX1	SMAP2
CLDN15	GPC5	DYNLL1
PMM2	OMD	ELAVL3
CEP89	NMT1	AK5
ZNF562	CCDC91	KLHL2
POFUT2	DNAJA4	ANXA11
NBEAL1	LYSMD2	HORMAD1
RIPK1	PCYT2	FBXO2
GNAI3	TAF9	TMEM229A
ZNF624	CCNA1	MPO
MRC2	SGTB	OPTN
IFI16	FMN1	MFAP3L
AMT	FAM217B	PTPRK
TBCCD1	CDKL5	SH3GLB2
PDS5A	RALB	SFRP1
BAZ1A	PINK1	ACTR1A
SHOX2	TXNDC9	WBP2
L3HYPDH	PRRG2	DCTN1
TWISTNB	SPATS1	UBXN10
WEE2	B3GALT2	PHF7
TWSG1	ADCY2	NALCN
PYGL	CDC42BPB	PPP2R2B
TMEM167A	ZNF507	QDPR
SDSL	CCDC7	TBC1D17
ABL1	CCDC60	PRNP
TNIP1	PLA2G1B	ANXA7
SOWAHC	PLCXD3	SLC7A2
ZNF35	MPHOSPH8	CELSR2
CDH11	DNAJC27	CREBL2
DARS2	LRRC1	FAM204A
DHX32	HIGD1A	MTRNR2L4
MOV10	TYMS	STON2
CMTM6	PABPC1L2B	ADAP1
CHSY1	DSTYK	HSPA1A
CCDC97	DNAL1	NECAB1
TRMT2A	PADI4	SAP18
DOCK11	MYOCD	OMG
PAN2	STOX2	CPXM2
DAP	SPOCK1	CHMP1A
SNRPD3	SYT11	SORCS2
RRS1	SOD1	SLAMF6
FAM114A2	RTP1	CORO2B
TTC27	CCR7	G6PD
COPB2	F8A1	MYL3
GALNT1	SNRNP35	SERPINA3
TGIF1	MRFAP1L1	PTOV1
TMEM248	CCDC81	TECR
TRIM16L	SPECC1	CA2
MIS12	ITIH2	CD59
VMP1	CD82	LMOD1
ATP6V0E1	SNAI3	GSTO1
ARSD	IKZF5	POMP
SEC11A	IL20RA	ABLIM3
TOR2A	TRIM3	CRTAM
DEGS1	TBX21	HMSD
FAT1	SMIM12	GJA1
BUB3	TEPP	A4GALT
ZSCAN16	DTX2	ART3
POLA2	LDHD	PICALM
TMEM141	PLEKHB2	KHNYN
GOLT1B	ART4	SLC16A8
ANKFY1	LMOD3	CEP104
SP1	PPP1R37	TBCB
CWC22	OSBP2	NMRAL1
SOCS1	ECHS1	TMEM219
CYP20A1	BAAT	PPP2R1B
STMND1	YWHAB	SETD3
BAMBI	RASGEF1C	AMN1
S1PR3	SIK2	CLCN4
ZNF880	WAC	PCDHA1
RBPMS	NUDT4	MAPRE2
HCFC2	PKDREJ	TPPP
ZNF319	RHEBL1	ETFB
CLIC6	NRN1L	GMFB
ZNF385C	RANGRF	TMEFF2
SREK1IP1	SDHB	BLOC1S2
SOCS2	MED25	GSTO2
IER3IP1	RRAGA	LGI4
ACTL6A	ALDH6A1	AVPI1
ZBTB6	CLCA2	NEMF
PRRC1	RASGRP2	DNM3
ALG2	HAX1	SMU1
PHKB	ACTR1B	KBTBD12
TXNIP	C2CD2L	ATP8A1
C5	PRELID2	HINT3
EDNRA	ADCY5	RAB40B
RBM14	NPB	BCL2L1
TMX1	HDHD3	RILP
NUP214	A1CF	STMN1
SEC13	TBRG1	HCN2
CEP41	ARHGAP44	C16orf89
MOB3A	PLA1A	SLC9A3R1
YIF1A	MAPK8IP3	CYSTM1
SCAMP4	ANKRD39	ASS1
TSHR	KCNH5	ELOVL7
HSBP1	CRYBB3	PDCD1
CRK	DDA1	KREMEN1
PLK1	UBE2M	RHOQ
BACE2	HR	TULP4
SNX21	LNX2	LRRC8B
NUP188	MCF2L	MAB21L3
ZSCAN32	COX4I1	UBA3
CNNM3	GNB1	SPNS2
USP28	SENP5	IMPA1
HEXIM1	OTUD5	ZMYND12
GNPDA2	PRKAR1A	PSD4
CROT	ANXA3	AP2A1
CYP4F22	UROS	MAP4
C7orf61	COL17A1	DAPP1
UBAP2L	MGMT	CYP11A1
HOXA4	CIC	HSBP1L1
MRTO4	AP1S3	SERINC3
KCNT2	TRPM3	PLEC
IGDCC4	MAST3	BSPRY
TENM4	AIFM3	DNAJC8
IMMP2L	PRODH	CLUL1
ATP6V1G1	DYNLT3	MT1G
ADCY6	PEX14	CA8
WDR4	ZFAND1	CES4A
C16orf87	KLC1	SELENBP1
RBM43	FBXO40	RAB11FIP4
HOXA3	CHCHD10	IFI27
RBM12B	SGIP1	ULK2
FAM120C	NUDT14	PPP1R3E
FCAMR	PHACTR3	AKAP6
IL23A	CORO2A	CACUL1
MAPK11	NCOA7	LRAT
NANP	TBK1	LRRC8C
TMEM50B	KCTD4	FAM50B
DGUOK	SCN1B	TUSC1
CDCA2	FXYD1	BTBD3
ZNF805	KIF1A	GTSF1
RIMKLB	PBX2	CYP39A1
FAM200A	MARK2	NPY
CRNKL1	PPP2R2C	TMEM38A
PSMG1	CLEC2L	MFSD6
LAMTOR3	STXBP5	APAF1
SPECC1L	FAM20B	SDC4
DDX3Y	NCEH1	OPALIN
GOSR1	PCBD1	CRHBP
RNF150	NAPA	TTLL7
THUMPD3	MT1H	LPGAT1
BOC	ZCCHC17	FUT8
KIAA1586	NDUFA3	SVIP
POLR2J	PRDM16	COBL
ZFP3	HERC2	MPL
PSMG4	MAP1LC3A	SLC24A2
DEK	DVL1	ANKS1B
DDX59	NAT8L	UVRAG
HOXA1	CPNE6	MICAL3
DNPEP	STOML1	KLF13
GON4L	HRAS	ZNF524
FAM160B2	LYNX1	PCGF5
UNC119B	CASP5	RYBP
SOX9	AGAP1	TMCC2
NEDD1	BAG1	TPGS2
TTC14	PRKG1	CERS1
TRIM25	C11orf91	MYBPC1
DNAAF2	RAB5B	USP48
TMED1	CDC37L1	NUAK1
C20orf96	ZNF749	TCEAL3
NAMPT	FAM200B	HSPB8
BRD2	ABLIM1	KIF6
TRPT1	PPIP5K1	GNAI1
ELANE	KLHL3	UBQLN1
HS2ST1	IFI27L1	LARP6
BRD4	ANK3	RAB6C
WDR75	GABRG1	STK31
ZNF629	PLEKHA1	MBNL2
NOTCH2	ATP6V1E1	TEX2
PCSK4	FABP6	DIP2C
GNL3L	PRKACB	DEPTOR
ARHGEF26	GNAO1	LSS
WDR36	ATP1B1	C5orf30
TIPARP	DDX24	HS3ST5
MFN1	SLC7A14	TPRN
C17orf58	FIG4	STAM
NUP205	SUPT5H	EIF4E3
E2F3	DACT3	KRT31
TRIM4	RNF32	STAG3
TMEM164	P2RY2	SGMS1
POM121C	SLCO1B1	KIF19
TMEM60	C3orf67	C10orf105
PMS1	LCOR	FOXO4
WDR3	DLG2	FBXW4
MRPL32	HS3ST2	TRIM2
RRP1B	TOM1L2	RGL1
HMGXB4	SST	DNAJC21
BRD3	DKK3	ITPK1
USP18	HOMER2	PTBP2
SELL	RNF10	KIAA2026
LPAR2	POLR2C	SLMAP
GEMIN5	HAS1	KIAA0232
RRAGD	NKX3-1	SESN1
HOXC4	LRRC7	MTCH1
RND2	HHIPL1	ZP3
TTLL6	HSPA12B	FN3K
FHDC1	KBTBD11	WFDC2
DCUN1D1	PLEKHM3	CYS1
FBN2	SLITRK1	BTBD8
FAM193A	ACTR3C	DEXI
SNCAIP	SAFB	MGST3
SLC26A7	ALDH2	CABYR
EEA1	BCL2L2	TYRO3
WNT5B	BSDC1	TESK2
CECR2	PLD3	FNIP2
KRCC1	KCNK1	CAPN13
PBX3	RANBP2	PTK2
GHDC	C17orf67	PLIN4
SRY	PTGDR	RGN
ZNF420	TNFRSF17	RPS6KA5
ERCC4	AKTIP	RNF220
UBXN7	OR7C1	ANO4
TAF7L	ADRA1A	CNDP2
CDC5L	FAIM2	PWP2
PABPC5	CNTNAP2	FAM76A
ASAP1	NOS1	DNAJB12
SMG6	PRDM2	ESD
SLC14A2	MYLK3	CGN
GNPAT	SLC6A15	DYSF
UTP20	CALN1	CITED4
PPP1R2	NAV3	ATP6V0D1
ATF1	PPP2CB	RUFY2
METTL2B	TCEAL6	HSPB2
SLC16A7	REPS2	ITM2B
TEX9	ARX	ASPRV1
SOX5	S1PR1	PNPLA4
LAMA1	ACSL4	GPR62
PFDN6	FBXO44	SMIM6
ALG10B	ZMIZ2	CD47
DMTF1	ACVR1C	IFI27L2
SBF2	CPLX3	ADARB2
NUDT6	LINGO2	USF2
RAD23B	TIMM10	CD19
ANKRD55	LIN37	LZTS2
HOXA10	ENTPD3	CYB5R2
HOXA11	CORO6	KIRREL3
RSBN1L	RS1	GIPC1
ANTXR1	GJB5	SEC61A2
FDXACB1	NDUFS5	SESTD1
XPO1	TMPRSS3	ABCA6
SCAF11	ATP13A2	MAPK8IP1
SLFN11	SLIT3	UBE4B
HOXA13	LRRC4B	ACTN2
SMC1A	FKBP1B	B3GAT1
UEVLD	ZER1	RABL3
FANCF	TNFRSF25	AGTPBP1
RFX4	CRELD1	RFESD
BZW1	USP33	EDA
TAF8	AP1G2	ELMO1
TNN	ME1	GAMT
MPHOSPH10	RASGEF1A	LCN12
TCTN1	CYB5B	KPNA6
CTSO	SUCLA2	HID1
HSPA9	DCUN1D2	C20orf194
ERLIN2	CNTNAP1	TSR2
C1orf94	PLA2G5	JAKMIP3
PCDHB16	DBNDD1	ARL6IP5
CCDC137	SYNGR4	ECHDC3
LMAN1	HOOK1	PPP1R21
MOSPD1	DMGDH	IFIT2
PDE3A	SLC5A10	PHYH
NF1	STAR	CCDC69
MTMR3	AJAP1	CYP2J2
WDR35	GNAT1	FGF1
BTG3	MRPS9	FCHO1
CTSK	NDUFB8	PICK1
DTWD1	ADAMTS16	PLCD1
DIAPH2	LCN10	IFT88
MNS1	ZNF670	PEBP4
C6orf47	RHCG	NEO1
ICOS	ACOT7	CRB2
TSPAN6	NAGPA	COG6
ARHGEF6	ARHGEF4	PPP1R12B
RBM34	THPO	RAB33B
DNAJC2	VSX1	SDHA
BIRC6	AP2M1	KBTBD3
CELSR1	GARNL3	MEGF9
SLC24A1	SLC25A28	LIMCH1
PHPT1	NTSR2	EPHX1
DHRS4	EIF5	SMIM14
GSC	ABR	NKAIN1
RNASEL	SPRYD7	CMC2
COL4A4	GIT1	TTLL11
TPR	ATP6V0C	FOXP4
OXLD1	CHIC1	DOCK5
SOS1	NUDC	ADORA1
MYO7B	PFDN2	MYO18A
EP400	RGS20	SSNA1
NUP153	FABP3	MATN1
IRX1	MRAS	AMER2
VSIG10	GUCA1A	KLHL32
HOXB4	SCAF1	FAM98A
SUN1	NCKIPSD	MYO6
RNFT1	SLC45A4	MID1IP1
UBE2D4	SHE	NRIP2
SLC16A10	ASPDH	TPPP3
DLAT	RNF175	ATXN2
DYNC2LI1	ACTA1	SYNPO2
SMARCA1	ZFYVE28	DLG1
C22orf23	COX6B2	ARL2
LIFR	CCDC106	SHISA2
HOXA6	NLK	NFASC
SULF1	ETS2	HHIP
GBA	ZNF839	RAPGEF3
STK33	LYPD6	TMC7
ZNF521	SLC52A3	RNF144A
ATIC	GPR146	WDFY3
WDR49	HERC4	CLMN
MOB1B	FHL2	PLLP
MORC4	SNTB2	CNDP1
HOXA2	RTN2	FAM102A
DDX20	MT1M	SECISBP2L
SALL3	DEGS2	DBNDD2
PMP2	EPN1	PIK3C2B
TMED2	MRPL20	ABCA2
UBR5	FOXJ3	MAL
NOP14	GNA14	LPAR1
KIF27	FLYWCH1	SORT1
MSX1	WNK2	CNP
ARSK	SYN3	PRR18
EFNA4	RXFP1	NKX6-2
ADAM21	GNAQ	MYRF
CCDC62	FTO	SEMA3B
CDK8	NR3C2	ERBB3
CDKL3	IQCK	EML2
SLC39A14	TOX2	TNFAIP8L3
IFT140	SMPX	TMEM235
EPC2	CRLF1	IPO13
ZCWPW1	FER1L6	SLCO3A1
PRSS27	IFNL1	RBX1
TFAP2B	RAD9B	PLXNB1
DIRAS3	HCAR3	STX7
SETD4	GPHN	ST18
TLE3	MESP2	ANKRD65
CCDC74A	CCNY	HPS1
NRF1	KLHDC9	SYNM
BHLHE40	FOXP1	SH3PXD2A
DDB1	CRBN	FBXL7
RAB41	C20orf85	ITPKB
TTC25	CCDC158	HSD17B3
EFCAB10	ANKRD1	TTLL5
TLCD2	SNX27	FYCO1
ZNF135	BARX2	PLCH2
ITGB8	BAHD1	CHST6
GLMN	YPEL4	TECPR2
TMEM106C	CMTM4	DNAJB2
SEC24B	GFRA2	COX6A2
KRTAP5-10	NRG3	SYNDIG1
HOXA5	LOXL3	KIAA0930
ADAL	PKP2	SLC12A6
MORN1	PLCH1	MAOB
HSD17B7	PELI3	ALAD
DNAJC7	C15orf41	VRK2
LHCGR	SCGN	SPOCK3
ZNF761	CAMK2G	USP31
ADH4	KCNK12	FAM178B
FOLR1	TUBA4B	IGSF8
IGSF5	TMEM14A	TUBB4A
ETF1	DENND6B	PAQR8
RPUSD2	RSPO2	LANCL1
IRX5	FAAH2	SUN2
CDC23	GTF2B	LGI3
UVSSA	AAK1	VPS26A
ELF2	ISCU	MPP2
XYLT2	ZBTB7A	FRMD4B
TRIM47	KIAA1324	DIXDC1
TASP1	BDKRB1	GPR37
HS3ST1	MAP1A	APLNR
TMEM67	SAMD12	CDH19
SUMF2	EPB41L1	SPATA2
TPRA1	UGT2B17	PLEKHG3
TMEM14C	C14orf132	BOK
ZNF260	CCDC28A	GSN
ZNF621	TMTC1	NIPAL3
GPRIN3	CDKL2	FAAH
ASPN	ZNF365	ISLR
GGT5	LGI1	SYT9
SDCBP	SH3BGRL2	NDUFAF3
PRPF38B	LSR	GDE1
ABCC3	SPATA6L	SEC11C
CHAC2	RFK	HMOX2
EVA1A	DDAH1	STMN4
PNPT1	RDM1	BANK1
PAWR	UPP2	UBE2D2
SYCE3	DACH1	TMBIM1
SRBD1	CTXN2	DUSP7
ANKIB1	FCER2	FAHD2B
CXCL3	GREB1	MAP7D1
SMARCA5	KIF17	ARHGAP23
ABL2	ATP1A2	PAF1
BARX1	TM4SF20	TFEB
RBM39	TERF2IP	CLCA4
TWF1	SMARCA2	PIP4K2A
MAP7D3	KIAA0319	PRKCQ
SCNN1B	CYP46A1	ARHGAP21
ZSWIM1	DOCK3	GPRC5B
CCZ1B	PAK1	TMEM135
TRAF5	SSX2IP	CPAMD8
EFHC1	MAGEE1	CCP110
PXDC1	REEP5	KIF16B
PFKFB1	C5orf47	GREM1
PLOD2	PHOSPHO1	PEX5L
LOX	IRF4	PDE1C
EN2	ADCYAP1	PLA2G4C
THUMPD1	RERE	MAP7
BRD7	MAN1A2	C2CD4D
SCUBE2	SPINT2	CFL2
GLB1L2	PTH1R	HDAC11
CIB1	ANKRD30B	C6
PLEKHF2	YWHAZ	SLC22A15
ARSF	YPEL3	GRM3
CIR1	MAPRE3	RHBDL2
ATF6	HSPA12A	S100A1
RSPH3	EPS8L2	GPR180
PARD3B	CCDC92	NIPA1
SERPINI2	SNCA	TRAPPC10
TWIST1	BRSK1	SH3GL3
LRRC17	CD200	CYTH1
EPS8L1	EMX2	CC2D1B
APOL4	CAMK2N1	CSRP1
RAB13	C19orf12	MYH14
UBE2F-SCLY	GABARAPL1	BIN1
PAXIP1	RNF11	ZNF582
PEX2	CBX7	PDK3
SMC5	TMEM160	PDE11A
DNAH11	HABP4	GAS6
CDC73	FSTL4	MKNK1
TCTN2	RAB6A	CMPK1
DPF3	MGAT3	EPB41L3
JAM2	CDH8	MGST2
NOL8	C1orf52	S100A13
COL4A3	NDFIP2	CYP4F11
MTCP1	AP2A2	GCHFR
SLC35A1	ATP6V1B2	POLR2I
UQCRHL	DGKE	TCHH
FIGNL1	TAF13	RRAS
ZMYM1	ATP6V1A	OTX1
SPICE1	ARPC5L	MACF1
C8orf33	KLHL35	ZBTB7B
PSEN2	ZBTB4	BHMT2
HYAL3	ATMIN	MAN1C1
LCLAT1	GPR88	ATP6V0B
TPMT	ERI3	TDRD10
RHEB	CDIP1	CD6
AOC2	HTR3A	DOCK4
SNRPA1	ATL1	RABGGTB
PGC	KIF5C	ZNF580
SCFD1	GYS2	ZFAND2B
DPY19L2	NR1H2	RAB2B
LIMK1	SSBP3	C16orf86
TAF1B	PPP1R7	POU2F2
MTMR1	CACYBP	FN3KRP
RGS12	JUND	XK
SRRM3	CDNF	ZNF575
FCRLB	CNGB3	CHPT1
PBX1	KRT17	CHCHD7
ATR	PNRC2	VSTM2B
KIAA1549	ABCC12	NUDT16
DDX51	MSRB2	PDLIM4
PACRGL	ATP8B3	TNFSF10
NRARP	ZNF565	ADRB2
MRPL1	ATP6V1C1	POLR2L
DPP6	FATE1	TINAGL1
ANKRD26	PAX7	CYTH4
ZNF184	TMEM215	S100A6
HNRNPUL2	ZSCAN4	STAT6
HMGCR	AQP7	CXCL14
DENR	SGCA	IFITM2
SIRT3	GJD4	PSMC6
WASL	GFRA4	ZNF407
CCDC34	SPRYD3	GRIPAP1
ZNF148	LRP11	CATSPER2
ZNF548	RHOBTB2	CHDH
VHL	SCN2B	GIMAP6
ZBTB16	HMGCLL1	MRPL37
GMCL1	TINCR	ABCA7
C1orf61	GRIN2C	C9orf72
IMMP1L	GABRA2	RAB3D
TNR	PALM	CTU1
RSF1	PPM1A	PAPOLG
HES4	OAT	TGFB2
FBXO21	PTH2R	MYSM1
MAGEL2	FNDC9	GPR132
COQ9	KIAA0513	CLEC14A
BACH2	IQSEC1	DIP2A
DPP8	LMO3	DERL3
LCE1E	KCNJ3	WWP1
LAMB3	MMD	CNPY2
ZNF711	PIM2	LTBP4
TET1	ABLIM2	SEL1L
SLC9A7	GPR68	PMM1
YAF2	NPAS1	GRHPR
ABAT	SSTR1	SCIN
GRIA1	ATP6V0A1	XCL2
ASF1A	PTER	TNFRSF10D
ZNF131	ARRB1	PSMF1
TBX6	LYPD5	LRRC32
SLITRK2	TOLLIP	ZGPAT
NKAIN4	CPNE7	ARHGAP6
TANGO6	MEPE	NOSIP
KCNIP1	HCN1	SFT2D2
YY1	INPP5F	GZF1
SHISA6	GNG3	NADK
SURF2	KRT222	GRB2
PARD3	TCF20	CNN1
GABRA3	CACNA2D3	TAGLN
KCNJ11	ARHGAP26	BTK
LRRTM3	FEZF2	PTPRJ
CFDP1	TRPC5	ARHGAP24
SEPHS1	GCM1	CHMP4A
MCHR1	TRHDE	ADCY4
MRPS35	KIAA1211L	CGA
TLK2	POU3F1	FAM222A
JMJD1C	FUT9	VSX2
ZBTB21	STK16	FABP1
RRP15	FKBP8	ADRM1
LRP4	IPCEF1	MCOLN3
ATP13A4	NEUROD6	ITIH3
SLC35F1	SLC30A3	RUSC2
LRRC20	GFI1B	GNG7
TMX3	SHOC2	PIM3
CDH10	TUBA4A	NFX1
FGD1	GRM1	SPSB2
DNMBP	BEX2	JUP
CRTAC1	TMEM240	DSCAML1
MN1	MGAT4C	CEACAM21
ACRV1	FBXO27	TMEM101
ALDOC	ADAMTS17	SLC29A3
CNTN6	OPRL1	CYB5R3
SUPT3H	CYP26B1	FBLN2
RGS6	GDI1	TBC1D8B
GSK3B	GHRL	KCNS3
SLC25A21	GPR61	SLC36A3
BAALC	GYPB	FSTL3
PRDM11	PRSS56	FAM131B
DNAJB5	TCERG1L	TRAPPC9
FXYD6	PTPRR	PSMD8
ZDHHC22	TOMM20L	CDH26
TTC3	AGBL4	LURAP1
C6orf163	TTC8	UBE3B
TMEM223	CUL1	TEX38
MAMLD1	DUSP5	IGFLR1
NCAM1	ELFN2	CELA1
PRDX2	NOTUM	ANO10
PBX4	CACNB4	FKBP6
ZNF219	RNF208	C1orf43
ELAC1	TBC1D30	NLRP2
NME7	FGF9	PPP1R12C
DCAF5	FBXL2	VTI1A
DPY19L3	PDE4A	C2orf42
PDZD2	CADPS	CD40
BCCIP	PRR5	WDR11
ZFPM2	PTPRN2	ILKAP
CBS	POU6F1	LRMP
AFF2	RB1CC1	HERC3
BEND7	MLLT11	SHISA4
COA3	N4BP3	GUK1
TSG101	RAB9B	DTNB
VPS37D	GNAL	GSTM5
VMA21	SH3GL2	UBAP1L
RORA	SV2A	SCRN1
COG4	SLITRK5	PI4K2A
SLC44A5	UNC13A	SYPL2
LSM1	PIP5K1B	RASGRF2
GPR158	PIANP	EYA3
CSNK1A1L	ADPRHL1	UHMK1
NFIB	CDK5R1	SIRPA
CDHR1	ENTPD6	CBLN3
ERC1	CPEB4	FARP2
CEP57	ATN1	MT1A
TSHZ1	GNB5	JAG2
TFAM	SCAI	ACSL5
TBCEL	MAST1	ANO2
DGKG	KCNIP4	EPS15
CMBL	KIF3C	PEF1
CSPG5	CSRNP3	GSTM4
ESRRG	NECAP1	API5
SMIM8	FRY	DHRS1
ZC2HC1A	PLEKHO1	CD8A
HES5	GRAMD1C	PDZD7
KDM5B	TM2D3	UPF1
IPO7	TRIM37	TTYH1
HMGCS1	NOS1AP	KRT81
ARMCX5	KHDRBS2	SFN
STAG1	SLC1A2	DTNBP1
ADAM22	CELF2	SBF1
SUSD5	AP3B2	RASGRF1
GLDC	VSIG2	MAPK3
ZNF195	LDB2	ADIRF
GSTA4	PTPN3	SIGIRR
KIF26B	TSPYL2	NUMB
MANEAL	VAMP4	EMCN
ADD2	PDS5B	GNLY
TRMT10C	CTXN1	SULT1A2
FAM222B	UQCRB	TFPT
NUDT11	ARPP21	GPR143
ANKRD6	LAMA3	CTNNBIP1
ERH	CDH12	GORASP1
CREBBP	DTX1	GZMH
FNDC4	THRB	HLA-DRB5
TFAP4	NAP1L5	MSRB3
PEX11B	MAP2K4	OPLAH
CLGN	SLC25A23	FCRL6
TCERG1	STK24	ASPHD1
BPHL	PIP4K2B	E2F4
GBX2	ARHGEF9	FAM160B1
MMD2	SCN3B	SERPINB9
DDX52	CFP	FMNL1
TIMP3	NBEA	TSGA10IP
CBX5	UBE2W	ATPAF1
SETBP1	CHST1	ZNF354B
MCAT	MLLT6	ALDH4A1
CXXC4	JPH4	EIF4G3
GMNN	OLFM1	MAP4K2
NELFA	ITSN1	TESC
SCD5	ZNRF3	BST2
NT5M	KIF5A	ZNF568
SLC4A4	TCEAL2	CORO1A
ERGIC1	C12orf43	DENND3
RMI1	EFR3A	ZSWIM8
CHD7	KCTD1	TPST2
THSD7A	PPP6R2	F3
TEAD1	NXPE1	NR2E1
GNL3	CLSTN2	ZBTB48
ZFAND6	CACNB2	PPM1B
RBBP6	BEND5	MED4
FOXO3B	SUSD4	CX3CR1
MRPL38	WDR83	UGT3A2
ZSWIM4	NRG1	EPHA1
PHF14	DDX25	MRPL2
MRPL36	RIMS2	MTHFR
RNF180	ATXN10	MED29
TSPAN11	HAPLN4	ZDHHC19
IRX2	ELAVL4	CCDC61
KLRC3	ZNF804A	GNPTG
ZNF275	KCNC1	STK39
MED19	CASD1	CD55
SLC25A15	FAM53C	PCBP4
OBSCN	MYL6B	SNX29
DHCR7	TBC1D24	APOD
FAM76B	RAI2	TACSTD2
ZSCAN26	AXIN2	RNF181
NCOR2	KLHDC3	FAM3B
HAUS1	MAP2	STEAP1B
UBAC2	FAXC	OTUD7A
DOK5	CHRNB2	FAM214B
VASH2	DLG3	CTTN
MSH2	NRN1	ZFYVE19
SMOC1	C9orf16	GALC
GSPT2	PTEN	GPR20
CCT2	CPNE5	QPRT
RBBP9	FAM216A	ADAT3
MAGED2	SLC16A14	LIN52
NLE1	CADM2	ATP6AP1
NOL6	PTGES3L	PAOX
EXOSC2	NDFIP1	PNPLA2
MLLT1	TERF1	RELT
PRR3	PRSS35	OR2L2
GLOD4	APOO	RBM42
DCLK2	PRPF19	TSPAN14
ZNF660	SS18L1	ATG7
STIM2	CSMD1	SFXN3
ZNF696	NOVA2	DDRGK1
COG1	CELF3	TMEM168
FBXO28	BEX1	CHMP5
TRO	ARHGAP19-SLIT1	ABTB1
DPYSL4	TRNP1	SLC7A7
PPP1R12A	AKAP12	TMEM61
C12orf73	NRSN1	ZNF488
ZNF780A	USP22	TPT1
SLC5A6	BEND6	SDHAF1
IP6K2	DISP2	CSF1R
TMEM44	NCKAP1	ATAD3C
TOMM6	TSPAN7	CAPNS1
ST7	UBE2N	SMURF1
DDX42	DPF1	REM1
C12orf57	TNS3	VWF
DLD	ZNF25	NKG7
LIPC	DCTN6	ACOT4
CHST8	DCAF6	HSD17B14
RNF128	FAM71E1	FBLN1
C17orf100	RTN1	GGA2
IFT43	PPP1R3C	CSF2RB
ZNF704	NRXN2	APBB1IP
DLG5	GPR85	SLCO2B1
ZC3H15	ARHGEF33	HLA-F
FOXO3	LHX6	TMEM50A
UPK2	KHK	R3HCC1
RNF2	PPP1R3G	B3GAT3
ZSWIM3	TPBGL	IL18
LYRM4	ADORA2B	FECH
HMX1	HPSE2	SCCPDH
DAXX	TLE1	SMIM1
RIT2	RPP21	PLIN3
EBF4	STS	ANAPC5
LPCAT1	CCDC3	TMEM184B
ZNF830	SCN5A	PRKCD
ARHGAP31	TESK1	POLD4
INVS	TNNT1	NLRP12
ALDH1B1	SLC2A9	HPS5
IRS1	WFDC1	P2RY13
CSNK1E	ACER2	TRAK2
ZNF709	FAM163A	TGFBR2
RTKN2	ABCC5	KCTD8
MEA1	SKI	CLIC4
ZNF200	CHRNA3	STX12
LRRN1	GPD2	PSAP
CRLS1	DLX1	PIGT
PDE4D	RDH13	NHLRC1
LYSMD1	TCTE1	UNC5B
NDUFA6	LIN7C	UNC5CL
SEZ6L	OTUB1	BMP8A
ZNF433	TDRD9	ITCH
NFIX	MARK4	HTATIP2
TIMM22	CLDN9	SMPD1
R3HDM4	PEX11G	TRPV2
PID1	LCMT1	TMEM140
PGAP1	CLPTM1	ERMAP
PATZ1	CRY2	TMEM59
ZNF84	TRAPPC6B	SLC46A3
AP3D1	NDRG3	ELF4
AFAP1L2	GNRHR	NFAM1
NEURL4	FAM189A1	CNNM2
ONECUT2	TUBB3	PTCRA
SLCO5A1	MTUS2	PTPRCAP
OLIG2	KCNK4	CREG1
MRPS25	SERP2	PDIA2
ZNF384	SERPIND1	M1AP
CTDSPL2	DLGAP1	DSC2
DLL3	RIMS1	PPDPF
YES1	MMP17	LSM10
MAP4K3	DIRAS1	RTCA
EXO1	LMO4	IGSF6
TCF4	FGF13	TANGO2
FUNDC2	GALNT18	FFAR4
HES6	HRH3	SSH2
EPHB1	PRICKLE1	PFKFB3
GADD45GIP1	PPFIA3	SSC5D
KHDRBS3	ITPKA	CXCL12
SPRED2	CBX6	GIMAP8
PCDHB10	SNX32	MFNG
RNF182	PPP2R1A	STX16
NCOA1	WSCD2	FCGR1B
ALDH5A1	STAU2	RNF144B
DPH1	CKB	C3
MOCS2	INSM2	TRMT13
LCMT2	DUSP26	TMC8
LRRC4C	RASD2	XKR8
C17orf97	AMZ1	POMGNT1
CCDC102A	NSG1	TRPV4
ATP2B4	COX7C	HLA-DMA
TUB	COX6C	TGFA
FADS1	OXR1	SRD5A3
NEK4	NDUFA1	PAQR4
AASDHPPT	ST8SIA3	MRPL48
SMG7	KCMF1	TRAPPC2L
SCN4B	NDUFB1	POGK
RAB2A	BCL11B	SAR1B
DPY19L4	BBC3	ZNF813
YWHAE	PFKP	STAM2
PRKCI	TTC9B	THAP10
ZCCHC10	C1QL2	ASCC1
INPP5E	PTPRN	RTKN
TMEM237	BABAM1	ANKH
MAGI2	CHRD	SERINC5
MSMO1	CDC34	CEBPE
GPATCH8	CACNG8	MAPKBP1
ARMCX4	SVOP	WWC3
CPE	SEZ6L2	APBB1
SLIT1	LGALSL	CDK19
TOP2B	PDE8B	RNF217
ZFHX2	MMP24	NCOA4
FAM161A	SLC2A12	RPS6KA2
LUC7L2	SPATA2L	PTDSS2
FHOD3	IRF2BP1	ELL2
INSIG1	CTXN3	RHOU
FAM199X	DPCD	ABHD6
RPRD2	TRUB1	LCN6
TMEM132A	CCSER2	PRIMA1
ESCO1	SPIRE2	HECW2
SART3	VDAC3	TAL1
NPHP1	LRRC73	MYOM1
IFT46	ENO2	TRPC4AP
RNF115	MZT1	AMDHD2
ATXN1	NMT2	FMNL2
DUSP14	PJA1	PIK3IP1
BCAR3	RNF41	HBS1L
TMTC3	PIP5K1C	KIF13B
AKNAD1	SGSM1	PLIN1
ICA1L	KCNH1	AK3
LIN9	SAMD14	FEZ1
SIRT5	MEIS3	C4orf48
HHAT	NRSN2	JAM3
CEP128	CCDC85B	PTPRD
SCN1A	DOK6	PTPRH
ATP1B2	ACTR3B	MAN1A1
LRRC57	RUSC1	GAB1
GRID2	SLC4A7	QKI
BRD8	PITPNM1	ARHGAP1
TXLNG	SEMA6B	PPP6C
DCAKD	PPP1R9B	DYNC1I2
TOR1AIP1	SUMO1	TRIM62
ORAI2	RAPGEFL1	ZCCHC24
ARMC9	MAPK1	TTYH2
METTL14	MGAT5B	CDH23
POR	DNAH14	MYLIP
SLX4IP	PPP3CB	USP54
THYN1	ZNF554	STARD13
CNTNAP3	SYNGAP1	DMRT2
DNAH7	PDZD4	OR2L13
NKX2-3	CUX2	ARHGEF10
IFT57	ABHD8	TMEM125
FDXR	TFR2	CDC42EP1
AKAP9	SLC9A5	FOLH1
GLI1	RFPL2	EVI2A
HCAR1	YJEFN3	ADAMTS4
ONECUT1	SLC25A12	MAG
RNF39	MYOM2	ENDOD1
DHTKD1	PELI2	SLC9A9
TRPM8	ATP6V1D	PHLDA3
PRAME	KIFAP3	CARNS1
SUCLG1	SLC25A38	FXYD4
GJB2	SLC25A34	NPC1
GATA4	ALG11	LRP2
DPEP1	HPS6	EMC2
TMC3	ZNF214	GPM6B
TBX5	DIRAS2	DOCK2
MAGEA1	INPP5J	EFHD1
ATP13A1	RGS7BP	GJC2
PCDHB15	LRFN5	LHPP
ELP5	DBP	TF
IL31RA	HERC1	CLDN11
PCDHGA10	R3HDM1	NACAD
SMCP	FLRT2	SLC44A1
TMPRSS9	ACBD7	SYNGR2
FREM1	TMOD2	ENPP2
C11orf71	GLRA3	SLC16A11
LHX3	KCNA3	ERMP1
SCNN1G	TRIML2	CNTN2
TRPS1	MNT	MOG
SF3B2	MRPL41	ERMN
PCDH10	BEX4	GPIHBP1
KCNJ8	PAK4	PRRG1
KANK1	LY6H	CYP27A1
VWC2L	HBM	ASB4
CHRNA7	ITM2C	PLP1
AP3S2	NPY1R	TMC6
CSN1S1	KLHL23	S100B
GSPT1	LDOC1	SLC45A3
LHX1	ZFYVE21	CMTM5
FRMD3	RLN2	SLAIN1
NAA35	MAP1S	FA2H
TMOD1	RAP1GAP	PLXNB3
SCN9A	SDR16C5	CDK18
CHST9	PRSS55	INF2
PCDHB12	SLC22A17	RHOG
AHCTF1	PCDHAC2	NIPAL4
COX7B	TMEM121	PLEKHH1
MASP1	LRTM1	ZNF536
CLEC4F	GPAM	PLEKHB1
PPP1R10	REM2	HOXD1
CHST15	TEF	ST6GALNAC3
LCAT	PGBD5	FAM53B
HOXB13	DPP10	MAP6D1
TIMP4	INTS6	SGMS2
HK2	MYLPF	SOX10
SLC17A8	TRPV6	SEMA4D
NOL10	PSMD6	PPP1R14A
ZNF608	DACH2	TMEM144
ORC1	SYT4	RASA3
PDLIM5	EID2B	GLDN
PLXNA4	BTRC	BEST1
MED13L	RPS6KA6	ARRDC2
BCAM	ADRA2A	C10orf90
PDE9A	DUSP9	KCNMB4
PRKY	UBAP1	FAM13C
HOXC11	SRSF8	RBP7
CDC25A	ICK	LDB3
LYPD1	GGNBP2	ZEB2
ZNF395	DCAF11	PXK
HOXC6	AARD	HSPA2
ZNF678	ZNRF1	NXPE3
PITX2	RNF38	PRR5L
ABCE1	NTNG2	CAT
PCDHB13	TUBB1	DMC1
WNK3	MORF4L2	PDE8A
USP34	ABHD14A	TRIM59
SH2B2	TCEAL5	PRDX6
SQLE	ANKRD29	DAPK2
ADCYAP1R1	EIF4ENIF1	RNF125
GPR161	ZFP82	ARHGEF37
KLHL25	ZBTB11	ARAP1
MIB1	ANKRD31	FNBP1
SMARCB1	TRAPPC13	WNK1
MEGF11	FRRS1L	HIPK2
SOX3	CHP1	STX3
CTCF	DNAJC28	SLCO1A2
ETV5	GNL1	FHIT
NPPA	MYADML2	TMTC4
ZNF716	LMTK2	HPN
BTBD17	NPAS4	KCNH8
LONRF1	PZP	CHN2
DTX3	TBR1	GPAT2
SPSB4	FBXL17	VAMP3
SMIM18	RTN3	PIR
GFRA1	OTUB2	LRRC8D
SLC39A6	SYNJ1	SFR1
BMPER	EGR4	PADI2
MRPS6	ZBTB18	LAMP2
SLC6A6	CCDC136	S1PR5
ACAT2	CADM3	SLC13A3
CSDC2	KIF3A	FAM124A
ARHGAP12	MAP6	SPTLC2
TBC1D7	RAB3GAP1	CLDND1
RFX7	COX7A1	CD22
ZADH2	CADPS2	AMOTL2
LCE1C	TENM3	CNTNAP4
PCDH15	FAM171B	NT5DC1
LRP1B	RORB	KIAA1324L
SMKR1	OPCML	PGAM2
EGLN1	FBXO33	SGPP1
MRPL35	UPF2	AGPAT4
FGFBP3	KIAA1549L	STOM
VAT1L	MCU	VPS18
CUL3	NGRN	LYL1
FADS2	NR1D1	HECTD3
MSX2	RUNX1T1	DUSP22
ZBTB8A	CDH13	TBC1D12
EYA1	BRSK2	SLC5A11
CYP27C1	LMO7	AMPD3
GLO1	GRIN2A	LACC1
KCND2	B3GALNT1	NFKBIB
DGCR6	ITPR1	SLC17A5
IL17RD	TBC1D9	PACS2
OR4N2	GSG1L	ATOX1
TSPAN12	APBA2	HVCN1
RASD1	SPTAN1	HHEX
TNRC6B	ATRNL1	RPS6KA1
EID1	CDH22	ROM1
RHBDL3	PNMA3	RRAGC
LRP6	PNMA2	BLVRB
ATRX	CPLX1	ADCY3
NXPH3	FBXW7	NFATC2
KCNJ16	STAT4	BLNK
GPATCH11	SYT2	PCED1B
SRI	TMEM25	ZDHHC2
CHCHD3	SEMA4A	PRDX1
CSNK1G1	ATP2B2	SLC26A9
GSTCD	PRKAR1B	NAPEPLD
DEPDC5	HTR2C	FAS
SHC2	ANO3	TMEM230
INSIG2	NSF	PYROXD2
FAM220A	FBXO9	NQO1
OLFM2	CLSTN3	PLEKHM1
PON2	FBXO34	DOHH
ZNF197	HLF	POPDC3
ZNF117	RGS7	TMEM31
WDR6	ELK1	DUSP23
KLHDC10	RASAL2	ADAMTS14
ZNF429	PRKAA2	LYPLAL1
DDX1	NRXN3	HEBP1
NUP43	OLFM3	UBE2L3
DBX2	ARF3	SERPINB1
DENND1B	ATP6V1G2	PTP4A2
MSI1	EFNA5	ST6GALNAC2
ARV1	RTN4R	RAX
TAF7	CEND1	ANKRD40
MAML2	CNTN3	TRIM41
NR2F1	PRKCE	ASPA
CCDC59	BASP1	SEMA4C
FAM71D	HSPB3	CPEB2
MYEF2	NSMF	BTBD16
POLR2B	AMPH	TMTC2
SAFB2	OXCT1	MYO1D
CCDC93	INA	ATP10B
LFNG	RAB6B	KLK6
SIPA1L2	BTBD9	ARHGAP22
SOX11	NMNAT2	LAMP1
TSR1	PCSK2	BCAR1
DHX40	KCNQ5	PMP22
EN1	CAMK1D	TRPM6
SIN3A	RABGAP1L	RAPGEF5
NVL	SLC32A1	ELOVL1
PRLHR	HPCAL4	ABHD12
CPSF7	GLS2	ZDHHC20
RANBP1	CDH7	NENF
ZNF639	GAD1	CPOX
UGDH	CNTN5	RNF130
WDR60	ADCY1	MYO1E
LGSN	SLC6A7	CTBS
CNOT4	SNAP91	NINJ2
EDNRB	KCNB2	TBC1D10B
G3BP1	PDPK1	ESYT1
PRR7	PPP3CA	RASGRP3
CYP2U1	SRGAP3	KEL
NUP93	ARL3	RNASE1
PROM1	PAK3	SZT2
CNEP1R1	GRASP	AFMID
KCNC3	CPNE9	SIRT2
SERPINE2	GABRA1	SHROOM4
TFDP2	NCS1	SLC12A2
CTNNAL1	ATP8A2	VWA1
CELF1	PLEKHM2	GJB1
ZNF853	GALNT16	SHB
GUCY1A2	GRM4	SLC39A13
MFAP1	BCL11A	CHMP2B
MNX1	SLC4A10	KANK4
HELZ	SULT4A1	ARHGEF2
USP21	NEFL	CHADL
IGDCC3	VSTM2L	GAL3ST1
KIAA0895L	CAP2	ROGDI
GART	SLC7A4	OR7A5
TADA3	PLK2	SEMA7A
RBBP4	PTK2B	POLR2A
FBXO11	SLC25A42	SHMT1
SSB	GPRASP1	MICALL1
FARSB	RGS4	RNH1
TBX3	SYT3	MGAT5
COX10	TAGLN3	MAP3K11
POLR1E	CNKSR2	DHCR24
RSBN1	PANX2	RGS10
EBPL	CACNA1B	COL9A2
CIAO1	PCP4L1	COMMD3
CCDC43	GPR26	VASN
TMEM65	CALY	SEMA3C
LRIF1	AP3S1	HAAO
ZFP41	CMIP	TBC1D9B
KHDC1L	ZYG11B	MMACHC
FHL1	ARNTL2	ZFP57
ST8SIA1	PVALB	ZNF438
OSBPL8	TTPA	TCFL5
CWC27	TAF4B	MYLK
NXPH1	NELL1	PLD1
KIAA0753	OCA2	PKP4
FAT3	PPP1R9A	PPARG
EMC8	MYLK4	FAM177A1
MRPS12	ZNF804B	SNX9
EXT2	TP53BP2	JOSD2
CCDC14	MAP7D2	ICOSLG
EVA1B	DZIP3	TLL2
RPN2	C17orf50	CPPED1
GTPBP2	CD177	HHATL
ALG12	ZMAT4	RILPL1
NRM	NELL2	DICER1
TMEM116	ABCA9	RAP1A
UMPS	NEFH	GALNT6
KLRG1	THRA	CFTR
PTGES3	ZNF385B	TGFB3
NSMCE1	MEAF6	TRAF1
TRAF4	NEDD4L	FAM171A1
PINLYP	ZNF428	LIPE
SLC35A4	NEFM	RAP1GDS1
ISG20L2	KCNA1	AKIRIN1
PIGN	PDP1	HAGHL
SLC35B2	HTR2A	MPP1
UGGT1	RSPO1	TGOLN2
GTF3C6	WASF3	ACAA2
METTL17	MPPED1	COX17
UBALD2	DCUN1D5	TMEM151A
MIER2	PREPL	PIGK
UACA	MPP7	APLP1
BLMH	ZFYVE9	RAB11FIP1
HIC1	GPR22	PTGDS
C16orf58	PITRM1	FGFR2
AUP1	PCBP3	STPG1
CNGA3	TEX15	GAB2
UBE2J1	SLC9A3R2	SLC48A1
PHF19	PAFAH1B1	CAPN3
TOR3A	MGRN1	SLC31A2
TBL2	ISOC2	SEC14L5
ADAM12	MAMSTR	INPP5A
PGLS	DNAJC12	SH3TC2
HEMK1	SLC13A5	CDR2L
ENPEP	NDUFB9	FIS1
DISP1	RPUSD1	ANGEL1
WDR1	ITGB1BP2	AIF1L
MMP9	PRKACA	C1orf122
FNDC3B	ZNF132	MAN2A2
SNAI2	SH2D1B	BCAS1
TXNDC17	PPP6R1	CBR1
MCM6	PSMC3	MTMR10
ZSCAN25	SLC2A4	NKAIN2
NAA38	FAHD2A	MTMR2
PPIL1	L1TD1	PREX1
FKBP7	ITGB1BP1	SYNJ2
HSPE1	MICU1	ZNF664
MALSU1	PPP5D1	NCKAP5
GANC	NAPG	SREBF1
ZCCHC7	MYO5B	GALNT7
SERPINH1	LRRC10B	ARL8A
SNTB1	PPP4R4	ZBTB38
SP3	HS3ST4	BOLL
TRAM1	GAPDHS	FRMD5
DYNLT1	ZNF469	PHGDH
MYBL2	ACYP1	SCD
SLC10A4	PCP4	TTC1
RBMS1	ZNF534	ATP11A
C1QTNF6	HPCAL1	ZNF652
COMMD2	TSPAN5	GABARAPL2
PSMG2	SLC35F3	VPS11
SEC63	PCDH20	FLT3
KIAA1191	KLHDC2	UBL3
ITPR2	AIPL1	PROX1
MCCC2	HDAC5	DOCK1
MED14	JOSD1	PLCL1
USP3	RHOT1	ATG13
SNRPG	AQP3	DUSP16
TIGD5	CLIC3	THRAP3
PRPF40A	EPHA10	IFIT5
WDR34	FAM49B	RABEP1
DDX19B	LEFTY1	MYH15
UBE2G2	RBP4	SDK2
HGSNAT	HEMGN	USP47
ALG3	PENK	RALBP1
DESI2	ULK1	KCNQ4
HAUS5	CALB2	SDS
EML4	P2RX2	PER3
PXDN	SERTM1	PLEKHA5
EIF4EBP1	KCNV1	DMXL1
CSNK1D	COX6A1	IGIP
LIMD1	TSPAN16	CLIP4
HMBS	KLC2	APOB
WSB1	BHLHE22	CCDC25
KDELR2	PGP	ENOX1
CMTM3	ADAD2	MAP1B
SMC6	PRKCG	SNX30
XRN2	ZCCHC12	AGPAT3
TNFRSF4	CEP170B	BDH2
TEAD3	CACNA1I	OGFRL1
CNIH4	EIF4E1B	PCMTD1
DDX39A	CCL17	FGFR1OP2
CKAP4	MPRIP	CD160
SYNRG	NISCH	MYOT
ZNF44	APBA1	DYNLRB2
ZNRD1	UGP2	PDE4DIP
CSPG4	SFTA3	DTNA
SPPL2B	RLBP1	DENND1A
MCM8	GABRA5	CALCOCO2
CKAP2L	DNAJC5	SOS2
TRIM28	NPTXR	LMBRD1
GRPEL2	CRHR1	NUAK2
GJC1	LRRC38	PLBD2
MCM7	GSK3A	OTUD1
KIF23	ICAM5	ANP32A
HNRNPH1	C4orf33	DYNC1LI2
ABHD11	HSD17B6	GALNT15
HLX	CTIF	MTF1
NCAPG	RERGL	FAM107B
PABPC1L	NNAT	PPP2R3A
RAE1	SHANK1	KTN1
AURKB	ST6GALNAC5	ABCA8
ADAM9	CLDN10	CYBRD1
TTC28	CRIP2	AK7
CABIN1	CAMKK1	PRUNE2
NTN1	PIN1	SNX11
LSM2	KL	ENO4
RRP9	SCG5	FAM228B
NOTCH3	NYAP2	IRF2
FGFR1OP	PLEKHG5	SLC24A4
NUDT1	POLR2K	CLDN20
GMPS	GDF5	EHF
LAMB1	CX3CL1	YTHDC1
ADAMTS6	NECAB3	RCBTB1
CRISPLD1	OCRL	GMPR
CAD	LPCAT4	EVI5
TBCK	DLGAP3	JMJD7
SIX2	EVL	PHF11
BOD1	RASSF7	YPEL2
NDC80	PDE2A	DUSP3
KCNRG	CAMTA2	ALDH1A1
AKAP8	RAB40C	IL1RAPL1
EIF3E	P4HTM	DNAJC15
HYAL2	RLIM	GFAP
MPLKIP	CDK5R2	TRIM44
MED24	GSTT1	LACTB2
C7orf26	RAB11FIP5	CERS4
FEN1	CAMK1	DUSP10
MRS2	KCNJ6	IRAK2
STK38	SHISA7	SLC14A1
SSBP1	CDK5	C1orf198
DLGAP5	LRP3	HHLA2
CC2D1A	DLK2	BHLHE41
TATDN2	DDN	CLN8
BRIP1	MTRNR2L3	CUEDC1
NOP16	PRICKLE2	RTP4
EIF4E2	PCDH8	DHRS9
CNOT10	BEGAIN	IRF9
ZNF93	PSD	SGK2
ITPA	EFR3B	CAPS
MFF	C2CD4C	SFTPC
HIF1A	C3orf49	TMEM167B
BRPF1	SPTBN2	SORL1
CDCA3	SCN8A	CERCAM
PNISR	SCAMP5	EFCAB14
KDM6B	ATP2B1	SAV1
POLR1C	EPB41L4B	WDR44
CHEK2	MADD	ENOX2
ZNF282	BLCAP	HHLA3
ZNF43	TMEM151B	ITGB4
NCOR1	SCN2A	MIER1
XPO5	SLITRK4	KIAA1841
COLQ	HTR5A	CSDE1
AEN	RAB15	KCTD18
NME4	ST6GALNAC6	FBXL14
STK17A	GHITM	INCA1
FOSL2	BDH1	YAP1
RACGAP1	GDAP1	PLCG2
NOP58	CHMP4B	MGST1
SNRPA	FOCAD	MROH8
CHST12	FAM49A	NDP
CLSPN	ELOVL4	NACC2
UTP6	TMEM59L	TFE3
HRH1	PRKAR2B	SLC7A8
CSNK2B	SRRM4	PHYHD1
HBP1	EPHA7	POU2AF1
PCED1A	JPH3	CORT
TNPO3	TTC33	CCNDBP1
TBCA	YBX2	UROD
CDH2	CKMT1A	TRPV3
TTYH3	KALRN	PM20D1
BCL6	C1QTNF4	ARAP2
INTS10	FADS6	C2CD3
CNOT2	EFNA3	PDCD4
HOXB7	CACNB3	GYG2
KPNB1	RIMKLA	ASB8
SNRPD1	TUBB2A	PLA2R1
NUP160	CELF5	CLCN3
CEP95	PTGES2	CEP350
VAV2	SYT12	SNX18
RPL39	RALYL	ZNF189
PRMT3	GSG1	MRPL23
CUX1	CBLN4	NUCKS1
CHST14	ADAM11	SLC36A4
RGS16	WIF1	PTPN11
POLH	NPTX1	IGSF11
NAF1	DGKZ	PPP2R5A
TMEM255A	SLC25A22	TAOK1
CLPTM1L	GJB6	SPAG9
ARHGEF39	ASIC2	BST1
ADAMTS5	PCSK1	POC1B
OLFML2A	TTBK1	CCDC88A
ARL16	MT3	CAST
SCFD2	CDR1	ORAI3
SMARCAD1	MATK	DPP7
ERGIC3	VWA5B2	L3MBTL4
BEND3	PDXP	ZSWIM6
ZNF543	MAPK9	PLSCR4
PAICS	CALB1	AFF1
FBXL12	CBLN2	GPBP1L1
CCT3	RUNDC3B	RSPH9
SEC16A	FBXL16	EDC4
HEATR1	FAM131A	SFMBT1
MED28	NPTN	ACSF2
FKBP9	LRTM2	THNSL2
CNPY4	PAK6	SULT1C2
HNRNPAB	PNCK	CCDC151
PSMA2	LAMP5	GALNT12
PPP1R15B	FGF17	GPR1
FBXO5	ANKRD9	EFHC2
ZNF300	CPLX2	IKZF2
RAD9A	NGB	ANKRD45
RNF216	UNC5A	DCUN1D4
POFUT1	DLG4	HLCS
SAAL1	ENSA	AGFG2
HAS2	CYFIP2	TNFSF14
SNRPF	PTPN5	CMPK2
HNRNPA2B1	RNF212	EXPH5
CEP152	KLK7	ZRANB2
ZNF669	ANKRD34A	LRRIQ1
EGFR	GNG13	SIGLEC11
PAG1	MOAP1	UBXN2A
ATP6V1B1	RAPGEF4	FAM189A2
TRIM52	LMTK3	ITSN2
PTBP1	GRM7	HIPK1
B4GALT7	CHAD	PLAG1
BRIX1	TMEM155	PBXIP1
CASK	GABRB1	TRAF3IP1
ZDHHC4	RAB26	TMEM217
ELN	AMPD2	BCO2
NFRKB	ADCY9	NMNAT3
MRPL3	CNIH2	MS4A14
ZNF626	AKAP5	IFRD1
TMEM45A	RUNDC3A	CASP1
ALG8	DNAL4	FRZB
FAM32A	CABLES1	NEXN
STT3A	REXO1	STAB1
WDR91	SLC17A6	GBP7
SLC35C1	DAB1	FEZF1
POLR2G	LGI2	KRBA1
GUCD1	ZNF540	ST7L
NUBP2	UQCRH	IKBKB
STK11IP	PPFIA4	CD58
RARS2	PDXK	LPXN
TMA16	SLC22A9	SLC45A2
ZFP36L2	LRFN2	ADAMTS2
P4HB	DNM1	HSD3B7
CALD1	SYNGR3	VGLL3
MRPL22	ATP1A3	MYOF
FBXO8	FBXO41	PDE7A
EEF1D	TTC9	LRRC8E
MON1B	CA7	GK5
LMF2	NETO1	ADAMTSL4
PLOD1	STMN2	C5AR1
FAM111A	SHANK2	TMEM150A
CNN2	NPM2	ALPK2
COPB1	CPEB3	TTF2
CDYL2	MYT1L	MMP19
KIF4A	UBE2QL1	NLRP14
GEN1	KSR2	COTL1
TRIP12	WIPF3	PSMB8
ARID3A	CABP1	MMP8
FMNL3	PI4KA	TMEM138
TNFAIP6	EEF1A2	LILRB3
ZNF561	BSN	TLR1
FN1	SLC25A18	NECAP2
CLK2	STX1A	SYNPO2L
DPP9	TESPA1	KLHDC7B
CARD8	KCNN1	TCIRG1
TIGD7	NDST3	CRYGS
URB1	AACS	SWI5
NUDT19	IQSEC3	CNOT11
ERCC6L	CKMT1B	RARRES2
RARG	SNPH	CD1D
MED23	WNT10B	CFD
FBLN7	PLIN5	GIMAP2
HMGB2	CDKN2D	AR
BDKRB2	CD164L2	ADPGK
RIPK2	MZT2B	SLC17A9
PRRX1	SCLT1	REEP4
BRAT1	CHRNA2	RGS1
PUS1	PITPNM3	ZC3H12D
UCKL1	ZBTB12	MCOLN2
PPP1R18	USP35	ATG10
XPOT	DGAT2	NME8
SMYD4	THOC7	TNPO1
NAGA	EPHA4	MDFIC
NEU1	SV2C	EHBP1L1
CD93	SEC23IP	HK3
PANX1	ADRB1	THEM4
NME3	MPP6	MYBL1
HDAC6	PUM1	SMS
OXA1L	NUDCD3	EIF5B
C18orf54	IL17RB	CCDC152
MMP14	ASPHD2	ARID4B
CDK5RAP3	PARM1	SYS1
FRMD6	SPEG	OMA1
GNB4	OPA1	TTC30B
RPL12	EVPL	VPS13C
PSMA1	C1QL3	AGO1
HEYL	HIVEP2	CFB
TMEM161A	VIP	FBLN5
PRR14	PNOC	EGF
XPO6	GOT1	TRMT2B
APLN	TMEM241	AP5B1
POPDC2	PCDH11Y	RNF213
WNK4	GPR83	ZSCAN29
OR51E1	CLIP3	SETX
RPS5	MAFG	HEPACAM
TYK2	SIDT1	AMDHD1
SMPD4	NCDN	ASIP
WDR46	SLC2A6	LSP1
MAK16	KCNAB2	RHBDD1
FILIP1L	LHX2	VNN1
HDAC3	ATP6V1H	SFMBT2
CNTROB	SNCG	DNAJC22
RPS16	SLC6A17	COL11A1
IVNS1ABP	KCNC4	KCNK5
MAPKAPK5	SH2D5	KCTD9
LIPT1	GFOD1	ITPRIPL1
RPS2	GPR6	RNF19A
C17orf80	RTN4RL1	CCDC18
ATF6B	HPRT1	ZC3H12A
PDGFRB	PLEKHA6	AHR
CDT1	SYNPR	ZNF585B
RAD54B	LRRC3B	TBC1D2B
NOX4	MEF2D	FAT4
MPZL1	C11orf87	H6PD
PHTF2	PDYN	AQP9
PRPF3	PPP1R3F	ELF1
TBXA2R	TTC7B	PALLD
ZNF443	ATXN7L3	GPR39
ZNF526	CALM1	TPRG1
NASP	SLC25A14	ZNF655
DDX58	MYPOP	SLC43A3
PRCC	GREM2	URM1
CLN3	CAMK2B	HNRNPF
PSMB1	MAP3K10	MAT2A
DCAF15	CARTPT	FGD3
RALY	ADRA1B	SRP19
PIGO	SLC10A5	DDR1
PLEKHJ1	STXBP5L	ZNF665
PSMB6	HK1	ZFP36L1
HPGD	GRM2	SYTL4
RABGEF1	GABRD	GALM
UBA52	UNC13C	TMEM38B
RBCK1	KCNH3	STYXL1
HMG20B	MAL2	TMEM87B
KXD1	GABRA4	PSMC2
CHMP6	MICAL2	VCAM1
KCNE4	PPP1R1A	C8orf37
COQ2	SLC8A2	CETN3
RCC1	C19orf81	ERAP1
NCKAP5L	CMAS	PLTP
GIT2	SLC17A7	ARHGAP15
PIK3C3	C9orf129	CCDC90B
ERCC8	DYNLRB1	THBS2
HOXD9	PHYHIP	ABHD3
UHRF1	SYNGR1	IQGAP2
IGLON5	NPR3	TRIP4
BLM	DUSP8	POLD1
USP19	GALNT9	MARVELD1
PPP1R14B	AGAP3	ANKHD1
PM20D2	CNNM1	MTIF2
MOSPD3	ENC1	CHFR
N4BP2	CCKBR	ASCC2
DKC1	HECTD4	TMCO6
EBF1	SLC26A8	PLOD3
PHF6	KCNS2	ANXA5
HCFC1	SYP	CD36
RBM4	CAMKK2	WDR26
ABHD2	PACSIN1	ZDHHC5
CBX1	CLTB	ALDH16A1
TMEM203	GLT1D1	SLC38A6
SMC2	CACNB1	RAP2B
HMGB3	ALDH1A2	SLC50A1
NCBP2	KCTD16	SAP25
RNF40	RERG	SP100
CBX3	TRIM54	GNL2
KPNA2	TNNT2	TDO2
DDX56	TMEM233	LARP4
EXOSC7	ARNT2	VENTX
RNF24	FAM81A	NUTF2
CIZ1	EHD3	EVA1C
TNRC18	UCHL1	RNPEP
NAA15	PSD3	RECQL5
SDC3	SYT1	MPHOSPH9
TBL3	KCNS1	GGCX
KIF14	CELF4	GNPDA1
SLC37A3	SYN2	NOL7
FAM111B	RBFOX3	IPP
PPIL3	CHN1	TRMU
PPRC1	TUBA8	AK2
TNKS1BP1	RAB3A	RREB1
ROBO2	B3GNT4	VASP
PURB	CDH9	SRGN
CRCP	STAC2	SH3TC1
PODXL	SNAP25	SLC30A7
HSPA13	CHGA	GSTK1
ZNF12	SNCB	GTF2H3
SFPQ	CHRM1	PTPN12
TONSL	RBFOX1	DPH5
ADPRM	OGDHL	HERPUD2
TECPR1	HCFC1R1	GATAD1
EIF2A	ERC2	SLC19A2
IPO9	TSPYL4	DNHD1
RAB39A	STXBP1	MFSD11
SETD5	SYN1	SRA1
PRRC2A	FBXL15	GPX8
ZNF462	MAPK8IP2	ARHGAP18
GPR173	CHD5	ARID3B
MCM4	STX1B	LAPTM4A
TTC31	PRKCB	TEP1
MRPL50	EPHB6	ADAMTS1
SOX4	JPH1	MAVS
ALKBH2	DOC2A	ERP44
GPC2	CAMK2A	ADAM17
MED21	SOHLH1	MIF4GD
TMEM39A	ANKRD18B	CDV3
PARD6G	TAC3	PSMD11
SNTG1	NECAB2	ARIH2
POLR1B	USP25	BTN3A2
TDG	YWHAG	GPATCH2
SNRNP200	VPS53	NUFIP2
CWC25	RIMS3	TRIM16
SOX2	STEAP2	IMPDH1
ACHE	KCNC2	NSL1
SPC25	PRRT2	IL10RB
CALCRL	SYT13	SUCLG2
MZF1	NEIL1	UBA6
AQR	WASF1	GTF2IRD1
ATAD3A	RIMBP2	TRRAP
CDCA7	TBC1D13	CCNJ
FOXK2	PNKD	CEP57L1
PIGX	MYRIP	B4GALT1
SEMA6D	ATP2B3	RASSF3
TM6SF2	ATP7B	CYP4V2
KDM1A	GRIN1	C12orf54
GGCT	TUBG2	CYP2S1
MRPS33	DFFB	PTPRC
ZNF285	ANKRD33B	TMEM106A
OXSR1	C1orf115	MAN2B1
EIF2AK1	MRAP2	RAB20
BRCA2	CACNG3	MSN
NAT10	SYT5	ANXA2
TMA7	KCNT1	CSTA
CCDC47	NRIP3	ARID1A
FAM136A	VIPR1	ELMOD3
PHF20L1	CCK	NABP1
CKS2	YWHAH	MSR1
KLHL20	TMEM130	NCF4
TXNRD3	SYT7	MTFR1
MRPL24	SLC9A6	GALNS
SPATA5	IDS	TNNI2
C21orf58	NEUROD2	ADTRP
SYCE1L	GABRG2	LETM2
BLVRA	VSNL1	PLSCR1
WDR74	GABRB2	TTC21A
FZD7	TSPYL1	TYW1B
PSMG3	BTBD6	FHOD1
SMAD1	SLC12A5	WDR5
SPAG5	HPCA	SERINC2
MFHAS1	DLGAP2	SLC11A1
TIA1	IL34	NEK6
DDX55	ZBTB41	MPZL2
LMNB2	MAP3K9	ARPC1B
EZH2	BAIAP2	COX19
KIF2C	RTBDN	ARHGEF1
CHEK1	NRGN	RELL1
ID4	CAMKV	SIRPB2
GTPBP10	CACNA1C	SLC15A4
NGLY1	CRYM	BRI3
LSM5	TMEM132D	NFATC3
EFTUD2	EMX1	ITGB2
IFT52	RYR2	TAGLN2
HIRA	VAMP2	OSCAR
AMH	NEGR1	FCGR2B
TIPIN	KCNMA1	PKD2
ZNF883	CCDC177	FCGRT
TIMM44	FRMPD4	EXOSC6
ZC3HAV1L	MYCBP2	FMO5
KBTBD2	PCLO	SOAT1
LSM3	TAC1	CD86
AGPAT5	KNDC1	PSMD5
ILF2	FAM8A1	SLC1A5
TMEM163	ZRANB1	MAFB
DCAF7	RSPO3	MAGT1
BMP7	WDR47	PSME4
SMARCE1	GAD2	ZAP70
CLPP	CREG2	SAYSD1
SOX12	CAMTA1	SS18
NLGN3	SLC25A4	TRIM26
MVB12A	PRMT8	STK3
RBM12	HS6ST3	KCTD12
SMIM3	PDE1B	TBC1D16
IGSF3	BEX5	GAA
CCND2	FXYD7	CRTAP
ZNF334	SPTB	TP53RK
ERAL1	CALM3	DCSTAMP
PCTP	MYO15A	PTGER4
PYCR1	PABPC1L2A	EML3
NUP88	KCNA2	RAB27A
DHX36	GDA	ARRDC4
PTPRE	ARHGDIG	TCN2
CDADC1	KY	CTSB
CLP1	EPN3	CCNE2
TRIB3	TGFBR3L	SNX19
DIABLO	PDE1A	LRCH4
SNRPB2	NGEF	ZNF71
VARS2	JAKMIP1	CEBPB
DCHS1	CA11	PLAU
DDX18	RAB3B	S100A11
WNT10A	CACNA1E	TRIM6
LATS1	ABCG4	GALNT10
S1PR2	MEF2C	SLC25A24
MEST	SV2B	ALDH3A2
SLC27A3	NAP1L2	POLR3B
CNOT1	NAPB	CARD6
SNAPC1	REPS1	TMEM51
XXYLT1	CYP4X1	TSR3
PEMT	PRRT1	TRAFD1
ZBTB9	KCNQ3	TMEM104
SMAP1	ETV3	TIMP2
LAMA4	EIF4A2	IGF2R
DSCC1		HS1BP3
LPL		RAC1
RRAGB		DMBT1
AFAP1L1		MFSD1
NSA2		CTSZ
ADAM19		SUFU
ADAMTS15		UAP1L1
SLC35B1		AP1G1
AGRN		JKAMP
ANGPTL2		HEXA
SHMT2		BRCA1
RPL10A		PHC2
INTS4		NFKBIZ
GEMIN6		NXF1
CCT5		CLIC1
CDH6		UBE2D3
SIGMAR1		NADSYN1
UNK		IRAK1
MRPS23		SETD9
IMPDH2		CLPSL2
IQGAP3		TRADD
ASF1B		RALGAPA2
TIMM9		ORAI1
ACAD10		WDR81
TSEN34		TFCP2L1
ALYREF		PCK2
SSR2		FAM20A
ARL6IP6		PLXND1
NT5DC2		BGN
NID1		ATM
STK36		PFN1
RPF2		NPHP3
PTGFRN		MGAT1
BTG1		MYL6
ASPM		COL18A1
NCOA3		CD164
EMG1		CTSC
MCM3		TGFB1
KIF18B		ARHGDIB
HJURP		NLRC4
RAVER1		EMILIN2
TDP1		OSGIN1
PLCB3		GPSM3
TP53		TMEM37
SETDB1		AKR1B1
CPNE1		GAPT
HOXB3		GIMAP1
RNASEH2A		C1QC
TAF4		SAMSN1
COPS6		ARPC5
ZNF202		MS4A6A
TOPBP1		CCDC54
IMMT		ABCD1
TRIM27		PUS10
FTSJ1		TNFRSF1B
ALDH18A1		TRAPPC3
TMEM177		CRIP1
MRPL45		MOCOS
DOCK6		GAL3ST4
CDK6		SAT1
POLRMT		FLII
TOP1MT		RGL3
KLHDC8A		CSNK2A2
DVL3		TRPM4
CDCA4		TOR4A
CENPH		HSPB6
CDK2		SIGLEC14
MED12		PARVB
SPRED1		RHOC
FAF2		CD4
AMMECR1		FCGR3A
EIF2B2		NMNAT1
CDKAL1		RNF17
B3GNT5		NOP10
WDR55		IL4R
ADAMTS3		ARHGDIA
NFIL3		DOK3
ZSCAN21		PTPN2
SEC61A1		LIMK2
TRMT5		TAZ
RAET1E		ITGA8
CCDC167		CENPB
TPRKB		NAGLU
CTHRC1		PRKCSH
CCDC130		INSR
TRA2B		ELOVL5
SMG8		ARAF
APEH		SLC25A13
DNTTIP1		NSMCE4A
EEFSEC		PDCD10
SLC36A1		ATF7
NELFE		RTTN
ADAMTS7		KIAA0355
MDK		TMEM86A
NKIRAS2		IP6K3
COL4A2		HPSE
TRIOBP		SUMF1
RNF145		RGS3
FANCG		TBXAS1
SNX3		WDFY4
RAC3		CYFIP1
CSTF1		MVP
PIGS		CCRL2
FARP1		CD300LF
ATG9A		FUCA2
NHP2		CPQ
ZNF441		PARVG
RPS10		ITGA2
DCPS		PAPSS1
AAR2		KIAA2013
LAMC3		EMID1
NODAL		FCGR1A
ROMO1		SAMD4B
OGFOD1		ACSM5
SNX14		OCSTAMP
PPP1R17		FLNB
RAB35		C3orf52
TTLL1		NKX2-8
RBM8A		AP1S2
TPPP2		DPEP2
YIPF3		DPYSL5
EEF1G		SLC35D2
EIF3H		STX4
SMURF2		LILRA2
CLHC1		LIPA
GTSE1		SNX6
CDK1		TALDO1
MRPS27		FRYL
BPIFB2		TJAP1
CDKN2C		KCNJ5
TUBB		ENPP6
LSM7		CCDC159
ZBED4		CTSD
RBFA		CD84
RPLP0		TLR7
RRM2		MYL9
TPX2		RHBDD3
ATP13A5		RER1
TOP2A		CYP4F3
MCM10		SLA
PFKFB4		CPVL
KRI1		GPAA1
ESYT2		RCSD1
CENPF		NAPSA
SENP7		CD200R1
ZNF827		LILRB1
DUSP12		FZD5
DDX41		MYL12A
RPL32		NDST1
GTF2F1		KCNK13
CCDC50		EBI3
MEN1		PEPD
DDX23		NAGK
CCNB1IP1		AKR1A1
KAT2A		TPK1
BOP1		PTPRU
BCHE		C3AR1
PQBP1		ARHGAP25
KHSRP		SLC25A26
MRPL14		DBNL
PGK1		KCTD10
AKT2		MS4A4A
MSTN		CHRNA1
PRKDC		VAV1
SLC25A36		SASH3
NDST4		CYBA
RMND1		LY86
POLR2H		NPLOC4
RSPRY1		MNDA
PFAS		AP1B1
RPS7		CCR1
MKI67		CALCA
MRPL4		HCLS1
RND3		GMFG
MRPL12		HCK
WDR12		HLA-DMB
GLCCI1		RAB32
GPR17		FUOM
CEP250		SNX8
TMEM97		IFFO1
TAOK3		MED8
CRB1		CPEB1
POLDIP2		CHMP2A
BEST3		RGS19
NOVA1		IL17RA
ARHGAP11A		UCP2
RGMB		LILRB4
VPS72		FOLR2
BMP2		LGMN
NOG		OTOA
FERMT1		SCARB2
CHL1		COPA
NLGN1		TIMMDC1
SOX6		WIPF1
PGAM5		CDC42
RIOK2		PLXDC2
CD24		CDC42EP2
FYN		CXCR4
NLGN4X		APOBR
ASIC4		BMP2K
KDM4B		ITGAD
MRPS26		GPNMB
CORO1C		TLR4
MRPL10		ASCL2
EFNA2		BNC2
HSF1		SWAP70
DDX11		SLC37A2
RBMX2		SERPINB6
PFDN4		SLC22A23
CRADD		NFKBID
MAPK1IP1L		MFAP5
EIF2S1		ALOX15B
ILF3		POLL
TMEM158		SIGLEC8
PTCH1		ARHGEF5
CILP2		CRYBB1
TRIM67		TREM2
SARM1		PYCR2
SMARCA4		REEP3
DNAH8		FOXO1
TLE6		ITGAX
LHFPL3		FMO4
DCX		PACSIN3
EDEM3		CSF3R
DUSP6		APOC1
TLCD1		IFNGR1
SAPCD2		STX11
UCK2		CYP4F12
AFAP1		TREML1
SLC29A4		MAN2A1
TMSB15A		MAMDC2
LAPTM4B		GM2A
ZNF286A		NCF2
PHF12		RNF13
MKRN3		FBXO7
CHD9		BBX
NPAS3		TNS1
TIGD1		DAZAP2
YTHDF1		SLC4A2
KLHL7		DAO
SEMA5B		NINJ1
ODC1		AGPS
D2HGDH		CRTC3
BCAN		SMIM5
GALNT13		RNF141
BID		RCBTB2
GALR1		ZDHHC14
ETFA		SELPLG
NEUROD4		GLTP
ZFP62		PIEZO2
MYT1		DNM2
PSME3		ANP32B
DBI		TBC1D2
COL9A1		CPM
DDX21		COL4A5
KLRC2		DIP2B
PER1		C21orf91
TSN		IRF8
RARA		HAPLN2
TCF3		TFEC
PGRMC2		PCSK6
ILDR2		FAR1
DROSHA		ST6GAL1
SNX22		COL9A3
TMEM100		MSLN
PCDHB3		GPR34
MMP16		EPB41L2
GAS1		PIGP
WSCD1		ALAS1
ZNF292		BACE1
PPM1G		FNTA
EPHB3		RETSAT
PTPRZ1		FAM131C
KCNQ2		FTL
FANCE		DYRK4
PHLDA1		GPD1
SYCE2		COX18
GLIS2		AXL
TRIB2		NMUR2
SOX13		SHROOM1
HMGN1		TMEM139
PPP6R3		SHKBP1
C1QL1		NRBP2
SULF2		LITAF
HEY1		TSPAN8
KIF24		DNAH17
JMJD4		TLE4
OBSL1		USH1C
RSL24D1		MBP
TUBG1		CTSH
ZMYND19		STRN
B4GALT5		TP53INP2
KLF15		MTUS1
MED20		MOBP
EPAS1		ACSL1
RPL26L1		PAQR6
SLC7A1		NFE2L1
GTF2E1		CERS2
IREB2		WASF2
SHROOM2		CD37
CYC1		ANXA9
SOX8		TJP2
TIMM13		FTH1
ZNF503		PSEN1
KLHL13		AATK
RFC3		ZFYVE16
ACBD6		MITF
ALG9		PLBD1
TRIM9		GCA
CACNG4		EML1
THSD1		LAYN
POLE3		CEBPA
LEMD1		MERTK
VPS54		SLC11A2
ZMAT3		ZDHHC9
PAX1		TMEM98
PRR14L		RHOA
PHB2		CDC42SE1
KAT7		CTNNA1
SPRY4		TUBA1A
SLC39A9		TMEM189
LYPLA1		CORO7
SNRPE		STARD7
MMP15		NDE1
LMO1		ABCG1
APC2		DDX4
[truncated: 1,689 more rows]
